1 **Septal Secretion of Protein A in *Staphylococcus aureus***

2 **Requires SecA and Lipoteichoic Acid Synthesis**

3

4 **Wenqi Yu<sup>1</sup>, Dominique Missiakas<sup>1</sup>, Olaf Schneewind<sup>1\*</sup>**

5 <sup>1</sup>Department of Microbiology, University of Chicago, Chicago, Illinois, USA

6

7 \*For correspondence: [oschnee@bsd.uchicago.edu](mailto:oschnee@bsd.uchicago.edu)

8

## 9 **Abstract**

10 Surface proteins of *Staphylococcus aureus* are secreted across septal membranes for assembly  
11 into the bacterial cross-wall. This localized secretion requires the YSIRK/GXXS motif signal  
12 peptide, however the mechanisms supporting precursor trafficking are not known. We show  
13 here that the signal peptide of staphylococcal protein A (SpA) is cleaved at the YSIRK/GXXS  
14 motif. A signal peptide mutant defective for cleavage can be crosslinked to SecA, SecDF and  
15 LtaS. SecA depletion blocks precursor targeting to septal membranes, whereas deletion of  
16 *secDF* diminishes SpA secretion into the cross-wall. Depletion of LtaS blocks lipoteichoic acid  
17 synthesis and promotes precursor trafficking to peripheral membranes. We propose a model  
18 whereby SecA directs SpA precursors to lipoteichoic acid-rich septal membranes for YSIRK/GXXS  
19 motif cleavage and secretion into the cross-wall.

20

## 21 **Introduction**

22 Surface proteins of *Staphylococcus aureus* and other gram-positive cocci enter the secretory  
23 pathway via their N-terminal signal peptides (Uhlén et al., 1984, DeDent et al., 2008). Once  
24 translocated across the membrane, surface proteins are covalently linked to cell wall  
25 peptidoglycan via sortase A-catalyzed cleavage at the LPXTG motif of C-terminal sorting signals  
26 (Schneewind et al., 1992, Schneewind et al., 1995, Mazmanian et al., 1999). Some, but not all  
27 surface proteins are secreted at septal membranes and incorporated into cross-wall  
28 peptidoglycan (Cole and Hahn, 1962, Carlsson et al., 2006, DeDent et al., 2008). Following  
29 division and separation of spherical daughter cells, cross-wall anchored surface proteins are  
30 displayed over large segments of the bacterial surface (DeDent et al., 2007). Cross-wall

31 trafficking of surface proteins requires a signal peptide with YSIRK/GXXS motif (Carlsson et al.,  
32 2006, DeDent et al., 2008). The YSIRK/GXXS motif is positioned N-terminal of the hydrophobic  
33 core, common to all signal peptide precursors traveling the Sec pathway (Emr et al., 1978, Emr  
34 et al., 1981, von Heijne, 1986).

35 Gram-positive bacteria rely on cell wall-anchored surface proteins for adherence to host  
36 tissues, evasion from host immune responses and acquisition of host-specific nutrients (Foster  
37 et al., 2014). Surface proteins with YSIRK/GXXS signal peptides are produced with high  
38 abundance and fulfill essential virulence functions during infection. For example, staphylococcal  
39 protein A (SpA) is well known for its attribute of binding to host immunoglobulin and disrupting  
40 adaptive immune responses (Forsgren and Sjöquist, 1966, Kim et al., 2016). SpA is synthesized  
41 as a precursor with an N-terminal YSIRK/GXXS signal peptide and a C-terminal LPXTG motif  
42 sorting signal (Abrahmsén et al., 1985, Schneewind et al., 1992). After initiation into the  
43 secretion pathway, the signal peptide is cleaved by signal peptidase (Abrahmsén et al., 1985,  
44 Schallenberger et al., 2012). Sortase A recognizes the LPXTG motif of the sorting signal, cleaves  
45 the polypeptide between the threonine (T) and the glycine (G) of the LPXTG motif and forms an  
46 acyl-enzyme intermediate with the C-terminal threonine (Mazmanian et al., 1999, Ton-That et  
47 al., 1999). The acyl-enzyme is relieved by the nucleophilic attack of the amino-group of the  
48 pentaglycine crossbridge within lipid II, the precursor for peptidoglycan synthesis (Ton-That et  
49 al., 2000, Perry et al., 2002). The product of this reaction, surface protein linked to lipid II, is  
50 then incorporated into peptidoglycan via the transglycosylation and transpeptidation reactions  
51 of cell wall synthesis (Ton-That et al., 1997, Ton-That and Schneewind, 1999).

52 Newly synthesized SpA is secreted into the cross-wall compartment, bounded by septal  
53 membranes of burgeoning cells during division (DeDent et al., 2007). Upon completion of  
54 peptidoglycan synthesis within the cross-wall, its peptidoglycan layer is split (Frankel et al.,  
55 2011). The adjacent cells separate and assume a spherical shape, resulting in SpA display on the  
56 bacterial surface (DeDent et al., 2007). Staphylococci divide perpendicular to previous cell  
57 division planes (Tzagoloff and Novick, 1977). By incorporating secreted polypeptides into newly  
58 synthesized cross-walls, staphylococci distribute SpA and other sortase A-anchored products  
59 over the bacterial surface (DeDent et al., 2008). However, not all sortase-anchored products  
60 traffic to septal membranes. Those that are secreted at polar membranes are also anchored to  
61 peptidoglycan but are not distributed over the bacterial surface (DeDent et al., 2008). In *S.*  
62 *aureus* strain Newman, thirteen different sortase-anchored surface proteins and four additional  
63 proteins are endowed with YSIRK/GXXS signal peptides for septal secretion: lipase (Lip),  
64 glycerol-ester hydrolase (Geh), murein hydrolase LytN and the cell size determinant Ebh (Yu and  
65 Götz, 2012, Frankel et al., 2011, Cheng et al., 2014).

66 The mechanisms supporting YSIRK/GXXS precursor secretion at septal membranes are  
67 not known. Here we show that the signal peptide of SpA is cleaved at the YSIRK/GXXS motif.  
68 Amino acid substitutions in the signal peptide that affect cleavage also impair SpA secretion.  
69 When used as a bait for the crosslinking of membrane proteins, purification of the SpA Ser<sup>18</sup>Leu  
70 (S18L) precursor identified SecA, SecDF and LtaS. We studied the contribution of these factors  
71 towards protein A secretion into the cross-wall compartment.

72

## 73 Results

#### 74 **SpA signal peptide variants defective for septal secretion**

75 To facilitate the analysis of signal peptide mutants, we generated SpA<sub>ED</sub>, a variant of protein A  
76 that is truncated for its C-terminal immunoglobulin binding domains, region X (Xr) and the  
77 LPXTG sorting signal (*Figure 1a*). *S. aureus* WY110 ( $\Delta spa \Delta sbi$ , pSpA<sub>ED</sub>) cultures expressing *spa*<sub>ED</sub>  
78 were fractionated into culture supernatant (S) and bacterial pellet (P) and analyzed by  
79 immunoblotting. SpA<sub>ED</sub> was found in the extracellular medium; its precursor species was  
80 detected in the bacterial pellet (*Figure 1bc*). Site-directed mutagenesis was used to generate  
81 short deletions and amino acid substitutions in the signal peptide of SpA<sub>ED</sub> (*Figure 1b*). Deletion  
82 of the YISRK motif ( $\Delta YISRK$ ) diminished the abundance of the SpA<sub>ED/ $\Delta YISRK$</sub>  precursor and its  
83 processing (*Figure 1b*). Single amino acid substitutions at two positions in the YISRK motif (I9S  
84 and R10A) resulted in precursor accumulation (*Figure 1b*). Further, the R10A variant exhibited  
85 diminished secretion and accumulated a precursor species that migrated faster on SDS-PAGE  
86 than the full-length precursor (*Figure 1bc*). Amino acid substitution at lysine 11 (K11A) of the  
87 YISRK motif had no effect on SpA<sub>ED/K11A</sub> precursor processing and secretion (*Figure 1bc*).  
88 Deletion of GIAS ( $\Delta GIAS$ ) or of the two variable residues in the GXXS motif ( $\Delta IA$ ) caused  
89 precursor accumulation and blocked precursor processing (*Figure 1bc*). Substitution of glycine  
90 15 (G15L) reduced the abundance of SpA<sub>ED/G15L</sub> and led to the accumulation of a unique  
91 precursor species that migrated faster on SDS-PAGE than full-length precursor (*Figure 1b*).  
92 Substitution of serine 18 (S18L) caused accumulation of full-length and processed precursors as  
93 well as reduced secretion (*Figure 1bc*).

94 *S. aureus* WY110 cultures were fractionated into culture supernatant (S), cell wall  
95 extract (W), membranes (M) and cytoplasm (C). The SpA<sub>ED</sub> precursor was found in the

96 cytoplasm and membrane, whereas mature product was secreted into the culture supernatant  
97 (S) (*Figure 2a*). Precursors of the SpA<sub>ED/ΔIA</sub> and SpA<sub>ED/R10A</sub> variants accumulated mostly in the  
98 cytoplasm, whereas the SpA<sub>ED/S18L</sub> precursor was located predominantly in the membrane  
99 (*Figure 2ab*). Pulse-labeling experiments revealed that wild-type SpA<sub>ED</sub> precursor was processed  
100 within 60 seconds into mature, secreted product (*Figure 2c*). In contrast, processing of the  
101 SpA<sub>ED/ΔIA</sub>, SpA<sub>ED/R10A</sub> and SpA<sub>ED/S18L</sub> precursors was delayed (*Figure 2c*). To test whether signal  
102 peptide variations affect trafficking of full-length SpA, mutations encoding the ΔIA, R10A and  
103 S18L variants were introduced into wild-type *spa*. Wild-type and mutant staphylococci were  
104 treated with trypsin to remove all surface proteins from the bacterial surface and incubated for  
105 20 min to allow for cell wall deposition of newly synthesized SpA. To localize SpA, bacteria were  
106 viewed by fluorescence microscopy after labeling with SpA-specific monoclonal antibody and  
107 Alexa Fluor 647-conjugated secondary IgG (red) and with BODIPY FL-vancomycin (green), which  
108 binds to cell wall peptidoglycan. As expected, wild-type SpA was assembled in the cross-wall  
109 compartment, whereas SpA<sub>SP-SaSF</sub>, which is secreted via a canonical signal peptide, was  
110 deposited into peripheral segments of the cell wall envelope (DeDent et al., 2008)(*Figure 2d*).  
111 SpA<sub>ΔIA</sub>, SpA<sub>R10A</sub> and SpA<sub>S18L</sub> exhibited defects in surface display, consistent with their observed  
112 defects in precursor processing and secretion (*Figure 2d*). Residual amounts of cross-wall  
113 localization were observed for SpA<sub>R10A</sub> and SpA<sub>S18L</sub>, whereas SpA<sub>ΔIA</sub> was not detected in the  
114 cross-wall compartment (*Figure 2e*). Together these data indicate that some features of the  
115 YSIRK/GXXS motif, specifically Arg<sup>10</sup>, Ser<sup>18</sup> and the GXXS motif, are crucial for septal secretion of  
116 SpA in *S. aureus* (*Figure 2e*).

117

## 118 Processing of SpA signal peptide variants

119 Wild-type SpA<sub>ED</sub>, SpA<sub>ED/ΔIA</sub>, SpA<sub>ED/R10A</sub> and SpA<sub>ED/S18L</sub> were purified from staphylococcal  
120 membranes via affinity chromatography, analyzed by Coomassie-stained SDS-PAGE and  
121 identified by Edman degradation (*Figure 3a*). For wild-type SpA<sub>ED</sub>, full-length precursor (SpA<sub>ED</sub>-  
122 1, starting at Met<sup>1</sup>), as well as two precursors with faster mobility on SDS-PAGE (SpA<sub>ED</sub>-2 and  
123 SpA<sub>ED</sub>-3) and mature product (SpA<sub>ED</sub>-4), i.e. SpsB signal peptidase-cleaved SpA<sub>ED</sub> starting at  
124 Ala<sup>37</sup>, were identified (*Figure 3ab*). Edman degradation revealed that SpA<sub>ED</sub>-2 is a product of  
125 proteolytic cleavage within the YSIRK/GXXS motif (N-terminus Gly<sup>13</sup>). SpA<sub>ED</sub>-3 is a product of  
126 further cleavage, as Edman degradation identified its N-terminal amino acid 10 residues  
127 downstream (N-terminus Thr<sup>23</sup>) (*Figure 3ab*). Purified SpA<sub>ED</sub>-1 precursor as well as its SpA<sub>ED</sub>-2,  
128 SpA<sub>ED</sub>-3 and SpA<sub>ED</sub>-4 cleavage products were analyzed by MALDI-TOF-MS, confirming the  
129 predicted mass of the precursor and its cleaved species (*Table 1*). SDS-PAGE and Edman analysis  
130 of the SpA<sub>ED/S18L</sub> sample revealed the same four species as wild-type SpA<sub>ED</sub>, albeit that the  
131 abundance of SpA<sub>ED/S18L</sub>-1 and SpA<sub>ED/S18L</sub>-4 were increased over those of SpA<sub>ED/S18L</sub>-2 and  
132 SpA<sub>ED/S18L</sub>-3 (*Figure 3ab*). Analysis of the SpA<sub>ED/R10A</sub> sample also identified four species, including  
133 SpA<sub>ED/R10A</sub>-1 precursor, SpA<sub>ED/R10A</sub>-3 cleavage product (N-terminus Thr<sup>23</sup>) and SpA<sub>ED/R10A</sub>-4  
134 mature product (N-terminus Ala<sup>37</sup>), whereas SpA<sub>ED/R10A</sub>-2 represented a variant cleavage  
135 product (N-terminus Ala<sup>10</sup>) (*Figure 3ab*). The SpA<sub>ED/ΔIA</sub> sample yielded the same precursor and  
136 cleavage species as SpA<sub>ED</sub> and SpA<sub>ED/S18L</sub>, however the abundance of SpA<sub>ED/ΔIA</sub>-1 was increased  
137 over that of SpA<sub>ED/ΔIA</sub>-2, SpA<sub>ED/ΔIA</sub>-3 and SpA<sub>ED/ΔIA</sub>-4 (*Figure 3ab*). Taken together, these data  
138 indicate that the SpA precursor (SpA<sub>ED</sub>-1) is cleaved between Leu<sup>12</sup> and Gly<sup>13</sup>, which are  
139 positioned between the two motifs (underlined) of the YSIRKL/GVGIAS sequence. The R10A

140 substitution alters the cleavage site and diminishes precursor cleavage, whereas the S18L  
141 substitution and  $\Delta$ IA deletion diminish precursor cleavage without altering the cleavage site  
142 between the YSIRK/GXXS motifs. Precursor cleavage between Gly<sup>22</sup> and Thr<sup>23</sup> was observed for  
143 all SpA variants, suggesting that it represents a proteolytic event unrelated to the function of  
144 the YSIRK/GXXS motif in targeting SpA to septal membranes.

145

#### 146 **Identification of proteins cross-linked to a mutant SpA precursor**

147 We used a biochemical approach to identify staphylococcal proteins that interact with SpA  
148 precursor in septal membranes. The SpA<sub>S18L</sub> precursor accumulates in septal membranes  
149 (*Figure 2bc*), and SpA<sub>ED/S18L</sub> precursor can be purified from these membranes (*Figure 3ab*). After  
150 crosslinking with formaldehyde, SpA<sub>ED/S18L</sub> precursor and associated species were isolated via  
151 affinity chromatography, heat-treated to resolve crosslinks and analyzed by Coomassie-stained  
152 SDS-PAGE and immunoblotting with anti-SpA (*Figure 4ab*). As compared to SpA<sub>ED/SP-SasF</sub>, which  
153 does not traffic to septal membranes and was not crosslinked to other proteins, several  
154 proteins were specifically crosslinked to SpA<sub>ED/S18L</sub> and were identified by mass spectrometry  
155 (*Figure 4ab* and *Table S1*). Most crosslinked proteins are components of the peptidoglycan  
156 (PBP2, MurE2, MurG, FemA, FemB, FemX), wall teichoic acid (TagB, TagF) and lipoteichoic acid  
157 synthesis pathways (LtaS) that are known to be localized to septal membranes (Pinho and  
158 Errington, 2005, Mann et al., 2013, Reichmann et al., 2014). We also identified EzrA, a cell  
159 division machinery component (Steele et al., 2011). SecA and SecDF, members of the bacterial  
160 protein secretory pathway (Oliver and Beckwith, 1981, Gardel et al., 1987, Pogliano and  
161 Beckwith, 1994), and LtaS, lipoteichoic acid synthase (Gründling and Schneewind, 2007), were



162 selected for further study. Immunoblotting confirmed SecA crosslinking to the SpA<sub>ED/S18L</sub>  
163 precursor (*Figure 4c*).

164

### 165 **SecA depletion in *S. aureus***

166 In *Escherichia coli*, *secA* is an essential gene (Oliver and Beckwith, 1981). SecA functions as an  
167 ATPase that moves many, but not all, precursor proteins across the SecYEG translocon  
168 (Tsirigotaki et al., 2017). To study the contribution of *secA* towards the septal secretion of SpA,  
169 we generated an inducible allele, P<sub>spac</sub>-*secA*, in *S. aureus* WY223 (*Figure 5a*). When induced with  
170 isopropyl β-D-1-thiogalactoside (IPTG), *S. aureus* WY223 (P<sub>spac</sub>-*secA*) forms colonies on agar and  
171 replicates in liquid media culture in a manner similar to wild-type *S. aureus* (*Figure 5bc*).

172 However, in the absence of IPTG, *S. aureus* WY223 cannot form colonies or replicate in broth  
173 culture (*Figure 5bc*). Following dilution of bacteria from IPTG-containing media into broth  
174 without inducer, *S. aureus* WY223 replicates for 3 hours at a rate similar to wild-type (*Figure*  
175 *5b*). Upon further dilution and incubation, *S. aureus* WY223 eventually exhibits growth  
176 retardation and arrest (6-hour time point). When analyzed by immunoblotting with SecA-  
177 specific antibody, SecA was depleted in *S. aureus* WY223 (P<sub>spac</sub>-*secA*) cultures 3 hours following  
178 dilution into inducer free medium. After 6 hours of incubation, SecA could no longer be  
179 detected (*Figure 5d*).

180

### 181 **SecA depletion blocks SpA secretion**

182 After dilution into media with and without inducer, wild-type (*S. aureus* RN4220) and P<sub>spac</sub>-*secA*  
183 (*S. aureus* WY223) were subjected to pulse labeling with [<sup>35</sup>S]methionine and protein A

184 precursor processing was analyzed by immunoprecipitation. In wild-type, SpA precursors are  
185 processed within 60 seconds; similar rates of processing were observed when the  $P_{spac}$ -*secA*  
186 mutant was grown with IPTG inducer (*Figure 6a*). In the absence of IPTG, SpA precursor  
187 processing was slowed to about 5 min, indicating that SecA depletion inhibits precursor  
188 translocation (*Figure 6a*). When analyzed by fluorescence microscopy in trypsin-treated  
189 staphylococci incubated for 20 min without protease, wild-type *S. aureus* deposited protein A  
190 into the cross wall (*Figure 6b, yellow arrow*). Cross wall localization was diminished in  $P_{spac}$ -*secA*  
191 mutant bacteria grown without IPTG inducer and restored to wild-type levels when bacteria  
192 were grown in the presence of inducer (*Figure 6c*). Six hours after dilution into broth without  
193 IPTG inducer, *S. aureus* WY223 ( $P_{spac}$ -*secA*) cells were grossly enlarged and surrounded by a thin  
194 layer of peptidoglycan with aberrant cross-wall formation (*Figure 6d, blue arrow*); at this time  
195 point, SpA could not be detected in the bacterial envelope. As a control, growth of *S. aureus*  
196 WY223 in the presence of IPTG did not affect cell size and SpA deposition into the cell wall  
197 (*Figure 6d*).

198         We wondered whether SecA depletion affects the secretion of other staphylococcal  
199 proteins. Glycerol-ester hydrolase (Geh) is synthesized as a precursor with YSIRK/GXXS signal  
200 peptide motif (Lee and Landolo, 1986). Following secretion at septal membranes into the cross-  
201 wall compartment, Geh is subsequently released into the extracellular medium (Yu and Götz,  
202 2012). When analyzed by immunoblotting of proteins in the extracellular medium, depletion of  
203 SecA in *S. aureus* WY223 ( $P_{spac}$ -*secA*) caused a reduction in secreted Geh, as compared to wild-  
204 type staphylococci or *S. aureus* WY223 grown in the presence of IPTG (*Figure 6e*). Staphylococcal  
205 nuclease (Nuc), a secreted protein that contribute to the pathogenesis of human and animal

206 infections, is synthesized as a precursor with a canonical signal peptide (Phonimdaeng et al.,  
207 1990, Shortle, 1983). The abundance of secreted Nuc was also diminished in SecA-depleted  
208 cultures of *S. aureus* WY223 (*Figure 6e*). As a control, production of sortase A in staphylococcal  
209 membranes was not affected by the depletion of SecA. Taken together, these data indicate that  
210 SecA is essential for *S. aureus* growth and for the secretion of precursors with canonical and  
211 YSIRK/GXXS signal peptides.

212

### 213 **Localization of SecA and SpA precursors in staphylococci**

214 To localize SecA within *S. aureus*, we generated a translational hybrid between *secA* and the  
215 structural gene for super-folder green fluorescent protein (*gfp*) (Pedelacq et al., 2006) under  
216 transcriptional control of the  $P_{tet}$  promoter in *S. aureus* WY230 ( $P_{spac}$ -*secA*,  $P_{tet}$ -*secA*:*sfGFP*,  
217 *Figure 7a*). Expression of *secA*:*sfGFP* in the  $P_{spac}$ -*secA* variant restored bacterial growth in the  
218 absence of IPTG inducer, indicating that *secA*-*gfp* is functional (*Figure 7b*). Growth restoration  
219 occurred in the presence and in the absence of anhydrotetracycline (ATc), suggesting that  
220 *secA*:*sfGFP* must be expressed even in the absence of the  $P_{tet}$  inducer (*Figure 7b*).

221 Immunoblotting staphylococcal cell extracts 3 and 6 hours following dilution into media lacking  
222 IPTG revealed that *S. aureus* WY230 indeed produced small amounts SecA:sfGFP in the absence  
223 of ATc (*Figure 7c*). In the presence of ATc inducer, the abundance of SecA-GFP was increased  
224 (*Figure 7c*). As expected, wild-type SecA was depleted when *S. aureus* WY230 was cultured for 3  
225 or 6 hours without the IPTG inducer (*Figure 7b*). However, under SecA depleting conditions,  
226 even small amounts of SecA-sfGFP in *S. aureus* WY230 (-ATc) restored precursor processing of  
227 pulse-labeled SpA (*Figure 7d*). SpA precursor processing was accelerated to levels faster than

228 wild-type when *S. aureus* WY230 cultures were grown in the presence of ATc (*Figure 7d*).  
229 Fluorescence microscopy of *S. aureus* WY230 stained with the membrane dye FM4-64 (red)  
230 revealed SecA-sfGFP localization to plasma membranes (*Figure 7e*). In dividing cells, SecA-sfGFP  
231 was found on septal (*yellow arrow*) and on polar membranes (*orange arrow, Figure 7e*). ATc-  
232 induced overexpression of SecA-sfGFP caused accumulation of hybrid protein throughout the  
233 cytoplasm (*Figure 7e*). Thus, in *S. aureus* WY230, SecA-sfGFP is associated throughout the  
234 plasma membranes and not restricted to the septal membrane.

235         The envelope of trypsin-treated, paraformaldehyde-fixed *S. aureus* WY223 ( $P_{spac}$ -SecA)  
236 was permeabilized with murein hydrolase and with detergent to detect intracellular precursors  
237 via microscopy with fluorescent antibody (Harry et al., 1995, Pinho and Errington, 2003). In *S.*  
238 *aureus* WY223 producing wild-type levels of SecA ( $P_{spac}$ -secA + IPTG), SpA precursors were  
239 localized to septal membranes (*Figure 8a*). In other images, SpA precursors appeared as two  
240 puncta or ring deposits at septal membranes, reminiscent of FtsZ and of the division rings that  
241 are known to accumulate at this site (*Figure 8ab*)(Lutkenhaus, 1993). In contrast, under SecA  
242 depleting conditions (-IPTG), SpA precursors in *S. aureus* WY223 were associated with polar  
243 membranes and were not localized to septal membranes (*Figure 8a*). These results suggest that  
244 in staphylococci with a functional secretion pathway, SpA precursor are localized to the vicinity  
245 of septal division rings. However, in cells lacking functional secretion machines, SpA precursors  
246 are located throughout the cytoplasm and cannot traffic to septal membranes.

247

248 **SecDF contributes to SpA secretion**

249 The *secDF* gene is not essential for protein secretion and *S. aureus* growth, however *secDF*  
250 mutants exhibit diminished secretion of many precursors secreted via canonical and YSIRK-  
251 GXXS signal peptides (Quiblier et al., 2011, Quiblier et al., 2013). SecDF is a member of the  
252 resistance nodulation and cell division (RND) membrane protein family with 12-transmembrane  
253 spanning segments. SecDF functions as a membrane-integrated chaperone. Sustained by the  
254 proton motive force, SecDF catalyzes ATP-independent translocation and folding of proteins on  
255 the *trans*-side of the plasma membrane (Tsukazaki et al., 2011). *S. aureus* expresses two  
256 additional RND proteins, here designated Rnd2 (SAOUHSC\_02525) and Rnd3 (SAOUHSC\_02866)  
257 (Quiblier et al., 2011). The *rnd2* gene is located downstream of *femX*, whose product tethers  
258 glycine from glycyl-tRNA to the  $\epsilon$ -amino group of lysine in lipid II peptidoglycan precursor [C<sub>55</sub>-  
259 (PO<sub>4</sub>)<sub>2</sub>-MurNAc(L-Ala-D-iGln-L-Lys-Da-Ala-D-Ala)-GlcNac](Rohrer et al., 1999). Rnd2 product  
260 interacts with FemB, PBP1 and PBP2 (Quiblier et al., 2011). As SecDF, FemB and PBP2 were each  
261 found crosslinked to SpA<sub>ED/S18L</sub> precursors (*Table S1*), we asked whether *secDF*, *rnd2* and *rnd3*  
262 contribute to septal secretion of SpA. Compared to wild-type *S. aureus*, the  $\Delta$ *secDF* mutant (*S.*  
263 *aureus* WY418) accumulated SpA<sub>ED</sub> precursor in bacterial cells and secreted reduced amounts  
264 of mature SpA<sub>ED</sub> into the extracellular medium (*Figure 9ab*). *S. aureus rnd2* (WY416) and *rnd3*  
265 (WY400) mutants exhibited wild-type levels of SpA<sub>ED</sub> secretion (*Figure 9ab*). A variant lacking all  
266 three genes,  $\Delta$ *secDF*  $\Delta$ *rnd23*, accumulated precursors at a level similar to the  $\Delta$ *secDF* mutant  
267 (*Figure 9ab*). When analyzed for other secreted proteins, the  $\Delta$ *secDF* mutant secreted  
268 diminished amounts of Geh and failed to secrete Coa, whose precursor is secreted via a  
269 canonical signal peptide (Phonimdaeng et al., 1990), while the  $\Delta$ *rnd2* and  $\Delta$ *rnd3* variants  
270 displayed wild-type phenotypes (*Figure 9ab*). Thus, SecDF, but not Rnd2 and Rnd3, contributes

271 to protein secretion in *S. aureus*. Immunofluorescence microscopy experiments revealed that  
272 septal secretion of SpA was diminished in the  $\Delta secDF$  and  $\Delta secDF \Delta rnd23$  mutants (*Figure 9c*).  
273 Unlike SecA-depleted cells, where SpA precursors failed to associate with septal membranes,  
274  $\Delta secDF$  and  $\Delta secDF \Delta rnd23$  mutants exhibited puncta of SpA precursors and rings of low  
275 fluorescent intensity at septal membranes (*Figure 9c*). The diminished abundance of SpA  
276 precursors at septal membranes was restored to wild-type levels by plasmid-borne expression  
277 of *secDF* in  $\Delta secDF$  (pSecDF) and in  $\Delta secDF \Delta rnd23$  (pSecDF) staphylococci (*Figure 9c*). These  
278 data suggest that SecDF aids in the translocation of SpA across staphylococcal membranes but  
279 is not required precursor targeting to septal membranes.

280

### 281 **LtaS is required for septal localization of SpA**

282 LtaS-mediated synthesis of lipoteichoic acid, a polyglycerol-phosphate polymer decorated with  
283 esterified D-alanyl and GlcNAc residues, is essential for *S. aureus* growth and cell division  
284 (Gründling and Schneewind, 2007). Earlier work generated *S. aureus*  $P_{spac}$ -*LtaS*, a strain with  
285 IPTG-inducible expression of lipoteichoic acid synthase. In the absence of IPTG inducer, LtaS is  
286 depleted in *S. aureus* ANG499 ( $P_{spac}$ -*LtaS*), providing an experimental system to study the effects  
287 of LTA synthesis on septal secretion of SpA (Gründling and Schneewind, 2007). Surface proteins  
288 were removed with trypsin and staphylococci were incubated for 20 min to localize deposition  
289 of newly synthesized SpA (*Figure 10bc*). LtaS depletion (-IPTG) resulted in SpA deposition into  
290 polar peptidoglycan, whereas under LtaS inducing conditions (+IPTG) SpA was localized in the  
291 cross-wall (*Figure 10bc*). We asked whether SpA precursors are mislocalized to polar  
292 membranes under conditions of LtaS depletion. Microscopic analysis of trypsin-treated,

293 lysostaphin- and detergent-permeabilized staphylococci revealed SpA targeting to septal  
294 membranes in wild-type (*S. aureus* RN4220) and in IPTG-induced *S. aureus* ANG499 ( $P_{spac}$ -  
295 *ltaS*)(*Figure 10d*). In contrast, without IPTG inducer, *S. aureus* ANG499 mislocalized SpA  
296 precursors to polar membranes (*Figure 10d*). Protein secretion and cell wall anchoring of SpA  
297 were analyzed by immunoblotting in *S. aureus* cultures separated into culture supernatant (S)  
298 and bacterial sediment (P, pellet) samples. These experiments revealed that LtaS depletion in *S.*  
299 *aureus* ANG499 ( $P_{spac}$ -*ltaS*, -IPTG) diminished the abundance of cell wall anchored SpA without  
300 affecting the secretion of Geh and Nuc (*Figure 10e*). Consistent with the immunoblotting  
301 results, LtaS depletion diminished the overall surface distribution of SpA (*Figure 10f*), in  
302 agreement with the hypothesis that cross-wall targeting via the YSIRK/GXXS signal peptide, but  
303 not polar secretion, is responsible for efficient surface distribution of proteins in staphylococci  
304 (Carlsson et al., 2006, DeDent et al., 2008). Together these data indicate that LtaS depletion  
305 and a block in lipoteichoic acid synthesis abolished SpA precursor trafficking to septal  
306 membranes without affecting its secretion at polar membranes.

307

## 308 Discussion

309 Cell wall-anchored surface proteins with YSIRK/GXXS motif signal peptides have been identified  
310 in streptococcal and staphylococcal species (Tettelin et al., 2005, Rosenstein and Götz, 2000).  
311 Although sortase-anchored surface proteins are found in many different gram-positive bacteria,  
312 the signal peptides of surface proteins in rod-shaped bacteria of the genus *Actinomyces*,  
313 *Bacillus*, *Clostridium*, and *Listeria* do not contain the YSIRK/GXXS motif. Common features of  
314 staphylococci and streptococci are their spherical or ovoid cell shapes and cell wall synthesis

315 programs at septal membranes; in staphylococci this compartment is designated as the cross-  
316 wall (Giesbrecht et al., 1976, Touhami et al., 2004, Monteiro et al., 2015). Earlier work  
317 demonstrated that the YSIRK/GXXS motif of the SpA precursor is dispensable for sortase-  
318 catalyzed cell wall anchoring (Bae and Schneewind, 2003). However, precursors with  
319 YSIRK/GXXS motif signal peptides are targeted for secretion at septal membranes and sortase-  
320 mediated deposition into the cross wall compartment (Carlsson et al., 2006, DeDent et al.,  
321 2008). After completion of cross-wall synthesis, peptidoglycan splitting and cell separation, the  
322 anchored products of *spa* and of other genes with YSIRK/GXXS motif signal peptides are  
323 distributed over the bacterial surface (Cole and Hahn, 1962, DeDent et al., 2007). In contrast,  
324 surface proteins with canonical signal peptides are deposited by sortase into polar  
325 peptidoglycan but cannot be distributed over bacterial surfaces (Carlsson et al., 2006, DeDent  
326 et al., 2008).

327         Although it is clear that YSIRK/GXXS signal peptides are necessary and sufficient for  
328 septal secretion of proteins, the mechanisms supporting such trafficking were heretofore not  
329 known. We show that the YSIRK/GXXS signal peptide of SpA is cleaved between Leu<sup>11</sup> and Gly<sup>12</sup>,  
330 separating the YSIRK sequence from the GXXS motif and from the remainder of the signal  
331 peptide. Amino acid substitutions and deletions that affect precursor cleavage and secretion  
332 map to three of the four residues (underlined) that are strictly conserved in the YSIRK/GXXS  
333 motif: Ile<sup>9</sup>, Arg<sup>10</sup> and Ser<sup>18</sup>. Substitution of the fourth residue, Gly<sup>15</sup>, with Leu resulted in  
334 diminished abundance of precursor substrate and secreted product and in accumulation of a  
335 cleaved precursor species (*Figure 1b*). On the basis of these observations, we are compelled to  
336 speculate that YSIRK/GXXS motif cleavage may represent a mechanism for precursor



337 translocation at septal membranes. For example, the YSIRK/GXXS motif may inhibit a key  
338 function of the adjacent hydrophobic core within signal peptides: promoting the membrane  
339 translocation of precursors. Such inhibitory mechanism could be relieved by a YSIRK/GXXS  
340 protease that localizes to the septal membrane. Other mechanisms of proteolytic control for  
341 YSIRK/GXXS mediated signal peptide function can also be thought of. Importantly, the discovery  
342 of two sequential proteolytic events, YSIRK/GXXS motif cleavage and the signal peptidase-  
343 mediated cut provide new experimental opportunities for the testing of predictive models. SpA  
344 precursors were also cut between Gly<sup>22</sup> and Thr<sup>23</sup>, a site that is located within the hydrophobic  
345 core of the signal peptide. Mass spectrometry analysis of the *S. aureus* COL secretome also  
346 identified signal peptide fragments that had been generated by cleavage in the hydrophobic  
347 core, including SpA signal peptides cleaved between Gly<sup>22</sup> and Thr<sup>23</sup> (Ravipaty and Reilly, 2010).  
348 The significance of signal peptide cleavage in the hydrophobic core is not known, as amino acid  
349 substitutions preventing such proteolysis have not been studied for their effect on protein  
350 secretion or membrane integrity. We presume that cleavage at Gly<sup>22</sup>/Thr<sup>23</sup> may not be related  
351 to septal secretion. Cleavage at the hydrophobic core may enable staphylococci to remove the  
352 products of processed signal peptides from the membrane. For example, products of  
353 degradative proteolysis have been observed during processing of SpA LPXTG motif sorting  
354 signal, which is cleaved between Thr (T) and Gly (G) and within the hydrophobic core (Navarre  
355 and Schneewind, 1994).

356       Precursors with amino acid substitutions or deletions in the YSIRK/GXXS motif are  
357 thought to accumulate in septal membranes, however these variants typically exhibit  
358 diminished secretion and cell wall anchoring in the cross wall (DeDent et al., 2008, Yu and Götz,

359 2012). Our observations corroborate these findings and suggest that not all features of the  
360 YSIRK/GXXS motif are required for precursor targeting to septal membranes. We took  
361 advantage of the SpA<sub>ED/S18L</sub> precursor and used affinity chromatography to purify crosslinked  
362 proteins. Several crosslinked proteins were already known to be located in septal membranes  
363 (PBP2, EzrA, LtaS), consistent with SpA<sub>ED/S18L</sub> precursor accumulation in this compartment.  
364 Among the crosslinked proteins are two components of the secretion machinery, SecA and  
365 SecDF, as well as LtaS, which catalyzes the synthesis of lipoteichoic acid in septal membranes  
366 (Tsirigotaki et al., 2017, Percy and Gründling, 2014).

367         The subcellular localization of the Sec apparatus has been examined in streptococci,  
368 enterococci and in *Bacillus subtilis*. A spiral pattern of Sec translocase has been reported for *B.*  
369 *subtilis* (Campo et al., 2004). In *S. pyogenes*, contradictory results have been reported for  
370 immunogold-labelling and electron microscopy experiments: SecA was localized to a single  
371 microdomain and also found distributed throughout the plasma membrane (Carlsson et al.,  
372 2006, Rosch and Caparon, 2004). In *S. pneumoniae*, SecA localization changed during cell cycle  
373 progression. In early divisional cells, SecA was predominantly localized to septal membranes,  
374 whereas during later stages of division SecA was hemispherically distributed within the region  
375 between septa and at the future equators of dividing cells (Tsui et al., 2011). *Streptococcus*  
376 *agalactiae* SecA was localized to septal membranes, whereas SecA was detected as a single  
377 microdomain in *Streptococcus mutans* and *Enterococcus faecalis* (Brega et al., 2013, Hu et al.,  
378 2008, Kline et al., 2009). We show here that *S. aureus* SecA is localized to the plasma  
379 membrane and is not spatially restricted to septal membranes or microdomains. This

380 distribution is consistent with our proposed role of SecA, promoting precursor translocation at  
381 polar and septal membranes.

382           When studied for its contribution to septal secretion, SecDF chaperone allows large  
383 amounts of protein A to be deposited into the cross-wall peptidoglycan and promotes secretion  
384 of YSIRK/GXXS motif precursors (SpA and Geh). Nevertheless, *secDF* is not essential for septal  
385 targeting or secretion of SpA precursors. In contrast, cells depleted for SecA, accumulate SpA  
386 precursors that cannot traffic to septal membranes in the cytoplasm. Finally, LtaS-depleted  
387 staphylococci are unable to synthesize lipoteichoic acid and cannot direct precursors to the  
388 septal area; instead, SpA is directed to polar membranes. We have incorporated these  
389 observations into a model whereby septal accumulation of LtaS and of lipoteichoic acids  
390 functions as a determinant for SecA-mediated targeting of SpA precursors. Following precursor  
391 cleavage at the YSIRK/GXXS motif, truncated SpA (SpA-2) is moved across the membrane, aided  
392 by the proton-motif force and by the chaperone activity of SecDF. Once translocated, SpA is  
393 cleaved by signal peptidase to generate SpA-4 and by sortase at the LPXTG motif of its C-  
394 terminal sorting signal (Navarre and Schneewind, 1994, Ton-That et al., 1999). The resulting  
395 sortase-acyl intermediate is then incorporated into cross wall peptidoglycan for distribution on  
396 the bacterial surface (Schneewind et al., 1995).

397

## 398 **Materials and methods**

### 399 **Bacterial strains and growth conditions**

400 *E. coli* strains were grown in Luria-Bertani broth (LB) or LB agar. *S. aureus* strains were grown in  
401 tryptic soy broth (TSB) or tryptic soy agar (TSA). Ampicillin (100 µg/ml) was used for plasmid

402 selection in *E. coli*. Chloramphenicol was used for selection of pOS1 derivatives (10 µg/ml) and  
403 pCL55 derivatives (5 µg/ml) in *S. aureus* (Lee et al., 1991). Erythromycin (Erm 10 µg/ml) was  
404 used for selection of *ermB* marked *bursa aurealis* transposon mutants in *S. aureus* WY110 ( $\Delta spa$   
405  $\Delta sbi$ ) and 10 µg/ml Erm plus 1 mM isopropyl  $\beta$ -D-1-thiogalactopyranoside (IPTG) was used for  
406 pMutin–HA–5'secA selection in *S. aureus*. Protein expression from *Pspac* promoter was induced  
407 with 1 mM IPTG. Anhydrotetracycline (ATc, 200 ng/ml) was used to induce expression from the  
408 tetracycline-inducible promoter in pCL55-P<sub>tet</sub> constructs.

409

#### 410 **Plasmids and strains**

411 To avoid mutations in the *spa* gene, all cloning procedures were performed at 30°C. All the  
412 pOS1-derivative and pCL55-derivative plasmids were constructed in *E. coli* DC10B (Monk et al.,  
413 2012) and transformed to *S. aureus* strains by electroporation (Schneewind and Missiakas,  
414 2014). All the plasmids or strains constructed were confirmed by sequencing (*Table S2*). Primers  
415 used in this study are listed in *Table S3*. To avoid cross reaction in SpA immunoblot and  
416 purification, *S. aureus* WY110 ( $\Delta spa \Delta sbi$ ) was generated by transducing the *sbi::ermB* allele  
417 from the Phoenix library (Bae et al., 2004) into *S. aureus* SEJ1, i.e. *S. aureus* RN4220 carrying  
418  $\Delta spa$ . Phage transduction was performed as described previously (Schneewind and Missiakas,  
419 2014). To construct pSpA<sub>ED</sub>, primers 10 and 69 were used to amplify the *spa* promoter and  
420 *spa*<sub>ED</sub> coding sequence encoding IgBDs E and D (-40 bp upstream of the transcription start site  
421 of *spa* to 459 bp of *spa* coding sequence) from chromosomal DNA of *S. aureus* RN4220. The PCR  
422 product was digested with EcoRI and BamHI, and ligated with plasmid pOS1 (Schneewind et al.,  
423 1993). To generate mutations and deletions within SpA signal peptide sequence, quick-change

424 mutagenesis was performed as follows: primers pairs (*Table S3*) that contain desired mutation  
425 or deletion were used to PCR amplify pSpA<sub>ED</sub>. The PCR products were digested with DpnI and  
426 transformed to *E. coli* DC10B. Plasmid variants confirmed by DNA sequencing were transformed  
427 to *S. aureus* WY110. To construct pCL55-SpA and its derivatives, primer pairs 175 and 177 were  
428 used to PCR amplify the *spa* promoter and full-length *spa* coding sequence. PCR products were  
429 digested with BamHI and KpnI and ligated into pCL55 cut with the same enzymes (Lee et al.,  
430 1991). The resulting plasmid pCL55-SpA was used as template for PCR mutagenesis of its signal  
431 peptide mutant derivatives via quick-change mutagenesis as described above. To construct  
432 pCL55-SpA<sub>SP-SasF</sub>, primer pairs 175 and 21 were used to amplify the promoter sequence of *spa*.  
433 Primers 22 and 23 were used to amplify coding sequence for the signal peptide sequence of  
434 *sasF*. Last, primers 24 and 177 were used amplify *spa* coding sequence for the E and D IgBDs. All  
435 three DNA fragments were ligated via SOE (splicing by overlap extension) PCR, digested with  
436 BamHI and KpnI, and then ligated into pCL55 cut with the same restriction enzymes. pCL55-  
437 derivatives were transformed to *S. aureus* WY110 and integrated into the chromosome at the  
438 *geh* locus (Lee et al., 1991). The integration was confirmed by PCR. To construct the *secA*  
439 depletion strain *S. aureus* WY223 (P<sub>spac</sub>-*secA*), primers 189 and 190 were used to amplify the  
440 ribosome binding site and the first 656 bp of the *secA* gene. The PCR product was digested with  
441 HindIII and KpnI and ligated with pMutin-HA (Bacillus Genetic Stock Center, Columbus, OH).  
442 The resulting plasmid pMutin-HA-5'*secA* was transformed into RN4220 and integrated at the  
443 *secA* locus in the chromosome. Clones were selected on TSA supplemented with 10 µg/ml  
444 erythromycin and 1 mM IPTG. To construct pCL55-P<sub>tet</sub>-*secA:sfGFP*, primers 180 and 181 were  
445 used to amplify *secA* full-length coding sequence together with its ribosome binding site.

446 Primers 182 and 183 were used to amplify *sfGFP* gene from pCX-sfGFP (Yu and Götz, 2012). The  
447 two DNA fragments were joined together by SOE. The resulting *secA:sfGFP* hybrid, which  
448 contains the 'Gly-Gly-Ala-Ala-Gly-Ala' between SecA and sfGFP, was digested with AvrII-BglII  
449 and ligated with pCL55- $P_{tet}$  (Gründling and Schneewind, 2007). pCL55- $P_{tet}$ -*secA:sfGFP* was  
450 transformed to into *S. aureus* WY223 ( $P_{spac}$ -*secA*) and integrated into the chromosome at the  
451 *geh* locus, thereby generating *S. aureus* WY230 ( $P_{spac}$ -*secA*,  $P_{tet}$ -*secA:sfGFP*). Plasmid pKOR1  
452 based allelic replacement strategy (Bae and Schneewind, 2006) was used to generate the  
453  $\Delta$ *secDF* (*S. aureus* WY418) and  $\Delta$ *rnd2* (*S. aureus* WY416) knock-out mutants. *S. aureus* WY412, a  
454 mutant with  $\Delta$ *secDF*  $\Delta$ *rnd23* mutations, was generated by transducing the *rnd3::ermB* allele  
455 from the Phoenix library into *S. aureus* carrying  $\Delta$ *secDF* and  $\Delta$ *rnd2* mutations. To construct the  
456 complementation plasmid pSecDF, the *secDF* ORF and 274 bp upstream sequence were PCR  
457 amplified with primers 315 and 316, digested with EcoRI and BamHI, and ligated into pOS1 cut  
458 with the same enzymes. The resulting plasmid, pSecDF, was transformed into *S. aureus* strains  
459 WY418 ( $\Delta$ *secDF*) and WY412 ( $\Delta$ *secDF*  $\Delta$ *rnd23*).

460

#### 461 **Cell fractionation and immunoblotting**

462 Bacterial overnight cultures were diluted 1: 100 into fresh TSB and grown to OD<sub>600</sub> 0.8. One ml  
463 culture was centrifuged at 18,000  $\times$ g for 5 min in an Eppendorf tube. The culture supernatant  
464 (S) was transferred to another tube and proteins were precipitated with 10 % trichloroacetic  
465 acid (TCA) on ice for 30 min. The bacterial sediment (P, pellet) was suspended in 1 ml Tris-  
466 buffer [50 mM Tris-HCl (pH 7.5), 150 mM NaCl] and incubated with 20  $\mu$ g/ml lysostaphin at 37°C  
467 for 30 min. After cell lysis, proteins from the cell pellet were precipitated with 10% TCA. To

468 localize proteins in different cellular compartments, cell fractionation was performed as  
469 follows: 1 ml culture ( $OD_{600}=0.8$ ) was centrifuged at  $18,000 \times g$  for 5 min in an Eppendorf tube.  
470 The supernatant was transferred to a new tube and proteins were precipitated with 10% TCA  
471 (S, supernatant). The pellet was suspended in 1 ml TSM [50 mM Tris-HCl (pH 7.5), 0.5 M  
472 sucrose, 10 mM  $MgCl_2$ ] and incubated with 20  $\mu g/ml$  lysostaphin for 10 min at 37°C. After  
473 centrifugation at  $18,000 \times g$  for 5 min, the supernatant (cell wall fraction) was transferred to  
474 another tube. The protoplast pellet was suspended in 1 ml Tris-buffer and subjected to freeze-  
475 thaw cycle for 3 times in dry ice/ethanol bath and warm water. Membranes were in the cell  
476 lysate were sedimented by ultracentrifugation  $150,000 \times g$  for 40 min. Supernatant was  
477 transferred to another tube (cytosolic fraction) whereas the pellet (membrane fraction) was  
478 suspended in 1 ml Tris-buffer and precipitated with 10% TCA. After TCA precipitation on ice for  
479 30 min, proteins were sedimented at  $18,000 \times g$  for 10 min, washed with ice-cold acetone, air-  
480 dried and solubilized in 100  $\mu l$  1 $\times$ SDS sample buffer [62.5 mM Tris-HCl (pH 6.8), 2 % SDS, 10 %  
481 glycerol, 5 % 2-mercaptoethanol, 0.01 % bromophenol blue]. For immunoblotting, protein  
482 samples were separated on 10%, 12% or 15% SDS-PAGE and transferred to polyvinylidene  
483 difluoride (PVDF) membranes. Membranes were blocked with 5% milk for 45 min. As needed,  
484 50  $\mu l$  human IgG (Sigma) was added to 10 ml block-solution to block SpA cross-reaction. Primary  
485 antibodies were affinity-purified rabbit polyclonal antibodies against SpA<sub>KKAA</sub> (1:10,000  
486 dilution), rabbit serum of anti-SrtA (1:20,000 dilution), rabbit serum of anti-SecA (1:10,000  
487 dilution), rabbit serum of anti-Geh (1:10,000 dilution), polyclonal antibodies of anti-Coa  
488 (1:5,000 dilution), rabbit serum of anti-Nuc (1:5,000 dilution), and anti-GFP rabbit serum  
489 (1:10,000 dilution) (Invitrogen). Membranes were incubated with primary antibodies for 1 h,

490 washed three times for 5 min with TBST [50 mM Tris(pH 7.5), 150 mM NaCl, 0.1% Tween 20],  
491 incubated with secondary anti-rabbit IgG linked with HRP for 1 h, washed and developed using  
492 enhanced chemiluminescence substrates. The intensity of immunoblot signals was analyzed  
493 and measured with Image J software (Schneider et al., 2012). Statistical analysis was performed  
494 using GraphPad Prism software. One-way ANOVA (Dunnett's multiple comparisons test) was  
495 used to compare the mean for each variant with the mean for SpA<sub>ED</sub> wild-type (*Figure 1c, 2b*).

496

#### 497 **Pulse-labeling**

498 Staphylococcal cultures were grown to mid-log phase (OD<sub>600</sub> 0.8) in TSB and bacteria  
499 sedimented by centrifugation at 18,000 ×g for 5 min. Bacterial pellets were washed twice and  
500 suspended in 1 ml minimal medium 4. <sup>35</sup>S-methionine/cysteine (100 μl =100 μCi Perkin Elmer)  
501 was added to bacterial suspensions, vortexed and incubated for 60 seconds at 37°C. 250 μl was  
502 removed and immediately mixed with 250 μl ice-cold 10% TCA to quench all metabolic activity  
503 (time 0'). Chase solution (50 μl of 2 mg/ml methionine, 2 mg/ml cysteine and 10 mg/ml  
504 casamino acids) was added to the remainder of bacterial suspension and incubated for 1, 5 and  
505 20 min. At each time point, 250 μl bacterial suspension was removed and mixed with 250 μl ice-  
506 cold 10% TCA. TCA precipitated cells were washed with acetone, dried and suspended in 1 ml  
507 0.5 M Tris-HCl (pH 7.0) containing 20 μg/ml lysostaphin. After lysostaphin treatment at 37°C for  
508 1 h, cell lysate was precipitated with 7% TCA, washed with acetone, dried, suspended in 50 μl  
509 4% SDS, 0.5 M Tris-HCl (pH 7.5) and allowed to incubate for 30 min prior to boiling.  
510 Subsequently, samples were incubated for 1 h with rabbit polyclonal anti-SpA<sub>KKAA</sub> antibody (Kim  
511 et al., 2010) that was 1:1000 diluted in 1 ml RIPA buffer (0.1% SDS, 0.5% deoxycholic acid, 1%



512 Triton X-100, 50 mM Tris-HCl pH 8.0, 150 mM NaCl). Protein A sepharose (50  $\mu$ l of 50% slurry,  
513 Sigma) was added to each sample and incubated for 1 h followed by five washes with 1 ml RIPA  
514 buffer. Proteins bound to the beads were solubilized by boiling in 15  $\mu$ l 2 $\times$ SDS sample buffer for  
515 10 min and separated on 10% (SpA) or 15% SDS-PAGE (SpA<sub>ED</sub>). Gels were dried on Whatman 3  
516 M paper and autoradiographed on X-ray film for 48 hours or longer.

517

### 518 **Purification of SpA<sub>ED/S18L</sub>, Edman degradation and MALDI-TOF mass spectrometry**

519 Overnight bacterial cultures of *S. aureus* WY110 (pSpA<sub>ED</sub> or its derivatives) were diluted 1: 100  
520 into 4 liters of TSB and grown to OD<sub>600</sub> 2. Staphylococci were sedimented by centrifugation at  
521 8,000  $\times g$  for 10 min. Bacteria were suspended in 30 ml of Tris-buffer, 0.5 (vol/vol) 0.1 mm  
522 sterilized glass beads were added and peptidoglycan was broken with 15 $\times$ 1 min pulses in a  
523 bead-beating instrument (MP Biomedicals). Samples were centrifuged at 7000  $\times g$  for 10 min to  
524 sediment glass beads. The supernatant was transferred to another tube and centrifuged at  
525 33,000  $\times g$  for 1 hour at 4 °C. The membrane sediment was suspended in 30 ml RIPA buffer and  
526 incubated for 1 hour with rotation. RIPA extract was centrifuged at centrifuged at 33,000  $\times g$  for  
527 1 hour at 4 °C. The supernatant was removed and subjected to affinity chromatography. Two ml  
528 50% suspension of IgG sepharose (GE Healthcare) was loaded onto column. Column bed was  
529 washed with 7 ml 0.1 M glycine (pH 3.0), twice with 14 ml 50 mM Tris-HCl (pH 7.5) and once  
530 with 10 ml RIPA buffer. RIPA membrane extracts were loaded onto the column followed with  
531 two washes with 14 ml RIPA buffer and once with 10 ml 50 mM Tris-HCl (pH 7.5). Proteins were  
532 eluted by adding four times 1 ml 0.1 M glycine (pH 3.0) to the column and immediately  
533 neutralizing the eluate with 25  $\mu$ l of 1.5 M Tris (pH 8.8). For Edman degradation, the purified

534 SpA<sub>ED</sub> precursors were 10-fold concentrated via Amicon<sup>®</sup> Ultra-0.5 ml Centrifugal Filters (10 kD  
535 cut off). Proteins were separated by 15% SDS-PAGE, electro-transferred to PVDF and stained by  
536 Coomassie-Brilliant Blue. Bands of interest were excised and subjected to Edman degradation  
537 (Alphalyse, Inc, CA, USA). For MALDI-TOF mass spectrometry analysis, 1 µl of SpA<sub>ED</sub> samples  
538 were mixed with 1 µl of 10 mg/ml sinapic acid, dried on the Bruker MTP 384 massive plate, and  
539 examined in a Bruker Autoflex Speed MALDI-TOF mass spectrometry in the linear positive-ion  
540 mode using peptide standards for calibration.

541

#### 542 **Crosslinking of SpA<sub>ED</sub> precursor**

543 Overnight cultures of *S. aureus* WY110 ( $\Delta spa \Delta sbi$ , pSpA<sub>ED/S18L</sub>) and *S. aureus* WY110 ( $\Delta spa \Delta sbi$ ,  
544 pSpA<sub>ED/SP-SasF</sub>) were each diluted 1: 100 into 4 L TSB and grown to OD<sub>600</sub> 2. Formaldehyde (0.9%,  
545 methanol free) was added to the bacterial culture and incubated for 20 min with shaking.  
546 Cross-linking was quenched by adding 400 ml ice-cold 0.125 M glycine and rotating the sample  
547 for 10 min. Staphylococci were sedimented by centrifugation at 8,000 ×g for 10 min. Bacteria  
548 were suspended in 30 ml of 50 mM Tris-HCl (pH 7.5), 150 mM NaCl, and washed twice in the  
549 same buffer. Sterilized 0.1 mm glass beads 0.5 (vol/vol) were added and peptidoglycan broken  
550 with 15×1 min pulses in a bead-beating instrument (MP Biomedicals). Samples were  
551 centrifuged at 7000 ×g for 10 min to sediment glass beads. The supernatant was transferred to  
552 another tube and centrifuged at 33,000 ×g for 1 hour at 4 °C. The membrane sediment was  
553 suspended in 30 ml 50 mM Tris-HCl (pH 7.5), 2% n-dodecyl β-D-maltoside (DDM) and incubated  
554 at 4 °C overnight. Samples were subjected to ultracentrifugation at 150,000 ×g for 40 min. The  
555 supernatant was subjected to affinity chromatography on IgG sepharose affinity purification as

556 described above. Eluate was concentrated via Amicon® Ultra-0.5 ml 10 kD Centrifugal Filters  
557 and mixed with equal volume of 2×SDS sample buffer. To reverse the cross-linking, samples  
558 were either boiled at 90°C for 20 min or, as a control, incubated at 60°C (no reversal of cross-  
559 linking). Proteins in all samples were separated on 12% SDS-PAGE and bands of interest excised  
560 as indicated in Figure 4 and subjected to protein identification and semi-quantitative analysis at  
561 the Harvard University Taplin Mass Spectrometry Facility (*Table S1*).

562

### 563 **SecA depletion and SecA-sfGFP induction**

564 Overnight cultures of *S. aureus* RN4220 (WT), *S. aureus* WY223 ( $P_{spac}$ -*secA*) and *S. aureus* WY230  
565 ( $P_{spac}$ -*secA*,  $P_{tet}$ -*secA*:*sfGFP*) were grown in TSB and 1 mM IPTG. Overnight cultures were washed  
566 twice with an equal volume of TSB and diluted 1:100 into fresh TSB with or without 1 mM IPTG  
567 and with or without 200 ng/ml ATc. After 3 h growth at 37°C, cultures were diluted into fresh  
568 TSB with or without IPTG or ATc and subjected to further growth at 37°C. Growth was  
569 monitored by sampling cultures at timed intervals and measuring optical density. One ml  
570 bacterial culture was removed after 3 hours (prior to the second 1:100 dilution) and after 6  
571 hours (3 hours after the second 1:100 dilution). Samples were processed for protein secretion  
572 and immunoblotting assays or analyzed by fluorescence microscopy. A similar procedure was  
573 performed for LtaS depletion using *S. aureus* ANG499 ( $P_{spac}$ -*LtaS*). Samples from the LtaS  
574 depletion experiments were analyzed after 3 hours growth with or without 1 mM IPTG.

575

### 576 **Fluorescence microscopy**

577 To observe SpA targeting to the cross-wall, 2 ml mid-log phase *S. aureus* culture (OD<sub>600</sub> 0.8)  
578 were centrifuged at 18,000 ×g for 5 min, supernatant removed, bacteria washed once in 2 ml  
579 PBS and suspended in 1 ml PBS containing 0.5 mg/ml trypsin (Sigma). After incubation at 37°C  
580 for 1 hour, staphylococci were washed twice with PBS, suspended in fresh TSB containing 2.5  
581 mg/ml soybean trypsin inhibitor (Sigma) and incubated at 37°C for 20 min with rotation. 250 µl  
582 of the cell suspension was removed and immediately mixed with fixation solution (2.5%  
583 paraformaldehyde and 0.006% glutaraldehyde in PBS). The cells were fixed for 20 min at room  
584 temperature, washed three times with PBS and applied to poly-L-lysine coated 8-well glass  
585 slides (MP Biomedicals) for 5 min. Excess and non-adherent cells were washed away with PBS.  
586 Mobilized cells were blocked with 3% BSA in PBS for 45 min and incubated with SpA-specific  
587 mouse hybridoma monoclonal antibody 5A10 (Kim et al., 2010) (diluted 1:4,000 in 3% BSA) for 1  
588 hour. Cells were washed 8 times with PBS and further incubated in dark with Alexa Fluor 647  
589 conjugated anti-mouse IgG (1:500 in 3% BSA) (Invitrogen) for 1 hour. Cells were washed 10  
590 times with PBS and incubated with 1 µg/ml BODIPY-FL vancomycin (ThermoFisher) for 10 min in  
591 the dark followed by washing 5 times with PBS. A drop of SlowFade® Gold reagent (Molecular  
592 Probes) was applied to samples before sealing coverslips with nail polish. Fluorescent images  
593 were visualized and captured on a Leica SP5 Tandem Scanner Spectral 2-Photon Confocal  
594 microscope with 100×oil objective. Identical settings and exposure times were applied to all  
595 samples.

596 To image SpA display on the staphylococcal surface, 1 ml of mid-log phase *S. aureus*  
597 cultures were centrifuged at 18,000 ×g for 5 min and supernatant removed. Bacteria were  
598 washed once in 2 ml PBS and suspended in 1 ml PBS and mixed with fixation solution. Cells

599 were fixed for 20 min at room temperature, washed three times with PBS and applied to poly-L-  
600 lysine coated 8-well glass slides (MP Biomedicals) for 5 min, stained with vancomycin and  $\alpha$ SpA  
601 antibodies and analyzed by fluorescence microscopy.

602 To localize intracellular SpA, 2 ml of mid-log phase staphylococcal cultures were  
603 centrifuged at  $18,000 \times g$  for 5 min and supernatant removed. Bacteria were washed once in 2  
604 ml PBS and suspended in 1 ml PBS, 0.5 mg/ml trypsin (Sigma). After incubation at  $37^{\circ}\text{C}$  for 1  
605 hour, staphylococcal cells were washed twice with PBS and fixed with fixation solution. The  
606 cells were fixed for 15 min at room temperature and 30 min on ice, washed three times with  
607 PBS and suspended in 1 ml GTE buffer [50 mM glucose, 20 mM Tris-HCl (pH 7.5), 10 mM EDTA].  
608 Lysostaphin (10  $\mu\text{g}/\text{ml}$ ) was added and 50  $\mu\text{l}$  cell suspensions were immediately applied to poly-  
609 L-lysine coated 8-well glass slides and incubated for 1 min. Non-adherent cells were removed  
610 and PBS, 0.2% Triton X-100 was applied to samples for 10 seconds. Excessive liquid was  
611 aspirated and slides were air-dried. Dried slides were immediately dipped in methanol at  $-20^{\circ}\text{C}$   
612 for 5 min, and in acetone at  $-20^{\circ}\text{C}$  for 30 s and then allowed to dry completely. Afterwards, the  
613 cells on the slides were re-hydrated with PBS for 5 min, blocked with 3% BSA, stained with the  
614 membrane dye Nile red (Sigma) and rabbit antibodies specific for SpA followed by Alexa-Fluor-  
615 488 conjugated goat-anti-rabbit-IgG and analyzed by fluorescence microscopy as described  
616 above.

617 To visualize the sub-cellular localization of SecA-sfGFP, samples from 3 h growth  
618 cultures were removed as described above. Bacteria were sedimented by centrifugation and  
619 washed twice in PBS. Cells were stained with 1  $\mu\text{g}/\mu\text{l}$  FM4-64FX (Molecular Probes) for 10 min  
620 in the dark and were then fixed with fixation solution for 20 min. After washing twice with PBS,

621 cells were applied to poly-L-lysine coated glass slides, SlowFade® Gold reagent added,  
622 coverslips sealed and samples imaged by fluorescence microscopy.

623 All the images were analyzed in Image J software (Schneider et al., 2012). To quantify  
624 the frequency of SpA cross-wall localization at 20 min regeneration after trypsin digestion,  
625 numbers of diplococci and numbers of cross-wall localized SpA were counted manually using  
626 the cell counter tool in Image J. Diplococci were defined as two daughter cells that had divided  
627 and formed a cross-wall but had not yet separated. Cross-wall localized SpA signals were  
628 defined as lines at the cross-wall of diplococci. Diplococci were counted in vancomycin stained  
629 images and cross-wall localized SpA was counted in merged images. The frequency was  
630 determined by dividing cross-wall localized SpA by the number of diplococci. An example of the  
631 counting method is displayed in the *Source file to Figure 2e*. At least two random images were  
632 acquired per sample for each experiment. Three or more independent experiments were  
633 performed and data from more than 200 diplococci were analyzed for statistically significant  
634 differences using one-way ANOVA with Dunnett's multiple comparison test comparing  
635 staphylococci expressing wild-type and *spa* variants (Figure 2e). In *Figure 6c* and *Figure 10c* the  
636 Tukey's multiple comparison test was used to analyze differences between multiple groups.

637

## 638 **Acknowledgements**

639 We thank Vytas Bindokas (Microscopy Core Facility, University of Chicago) for assistance with  
640 microscopy and members of our laboratory for experimental advice and discussion. This work  
641 was supported by National Institute of Allergy and Infectious Diseases grants AI038897 and

642 AI052474. W. Y acknowledges support from German Research Foundation (DFG) Fellowship  
643 (award YU 181/1-1). The authors declare no conflicts of interest.

644

## 645 **Figure legends**

646 **Figure 1.** Mutagenesis of the signal peptide of staphylococcal protein A (SpA). (a) Schematic  
647 illustrating the primary structure of SpA and of SpA<sub>ED</sub> with the immunoglobulin binding domains  
648 (IgBDs, designated E, A, B, C and D), region X (Xr), LysM domain and LPXTG sorting signal.  
649 Cleavage sites for signal peptidase and sortase A are indicated. The amino acid sequence of the  
650 SpA signal peptide is displayed. YSIRK/GXXS motif residues are printed in red. (b) The structural  
651 genes for SpA<sub>ED</sub> and its variants were cloned into pOS1, expressed from the *spa* promoter in *S.*  
652 *aureus* WY110 ( $\Delta spa \Delta sbi$ ) and secretion of SpA<sub>ED</sub> was analyzed by immunoblotting with SpA-  
653 specific antibody in the culture supernatant (S) and lysostaphin-digested bacterial pellets (P). (c)  
654 Percent secretion of wild-type SpA<sub>ED</sub> and its variants was quantified from triplicate experiments  
655 as the intensity of immunoblotting signals in the supernatant (S) divided by the sum signals in  
656 (S+P) fractions  $\times 100$ . Statistical significance was analyzed with one-way ANOVA comparing each  
657 variant with wild-type and *p* values were recorded: WT vs.  $\Delta GIAS$ ,  $p=0.031$ ; WT vs.  $\Delta IA$ ,  
658  $p=0.0032$ ; WT vs. R10A,  $p=0.0116$ ; WT vs. S18L,  $p=0.0172$ . \* denotes  $p<0.05$ , \*\* denotes  
659  $p<0.01$ .

660

661 **Figure 2.** SpA signal peptide variants defective in precursor processing and septal secretion. (a)  
662 *S. aureus* cultures were fractionated into cytoplasm (C), membrane (M), cell wall (W) and  
663 culture supernatant (S) and analyzed by immunoblotting with  $\alpha SpA$  to reveal the subcellular

664 location of wild-type SpA<sub>ED</sub> precursor and secreted product of the SpA<sub>ED/ΔIA</sub>, SpA<sub>ED/S18L</sub>, and  
665 SpA<sub>ED/R10A</sub> variants. Immunoblotting with αSrtA and αL6 was used to establish fractionation and  
666 loading controls. (b) Quantification of immunoblot signal intensity in (a) using Image J.  
667 Precursor abundance (%) the bacterial cytoplasm (C) and membrane (M) was quantified from  
668 triplicate experiments as the intensity of immunoblotting signals divided by the sum signals in  
669 all four fractions (C+M+W+S)×100. Statistical significance was analyzed with one-way ANOVA  
670 comparing each variant with wild-type and *p* values were recorded: for [C/(C+M+W+S)]×100,  
671 WT vs. ΔIA, *p*<0.0001; WT vs. S18L, *p*=0.0042; WT vs. R10A, *p*<0.0001; for [M/(C+M+W+S)]×100,  
672 WT vs. ΔIA, *p*=0.0056; WT vs. S18L, *p*<0.0001; WT vs. R10A, *p*=0.0405. \*\*\*\* denotes *p*<0.0001,  
673 \*\* denotes *p*<0.01, \* denotes *p*<0.05. (c) *S. aureus* cultures were pulse-labeled for 60 seconds  
674 with [<sup>35</sup>S]methionine and labeling quenched by adding an excess of non-radioactive methionine  
675 (chase). At timed intervals during the pulse (0') or 1 (1'), 5 (5'), and 20 (20') minutes after the  
676 pulse (chase), culture aliquots were precipitated with trichloroacetic acid (TCA), lysostaphin-  
677 treated, immunoprecipitated with αSpA and analyzed by autoradiography. (d) *S. aureus* WY110  
678 (Δ*spa* Δ*sbi*) harboring chromosomal pCL55-insertions of wild-type *spa* (SpA), *spa*<sub>ΔIA</sub> (SpA<sub>ΔIA</sub>)  
679 *spa*<sub>S18L</sub> (SpA<sub>S18L</sub>), *spa*<sub>R10A</sub> (SpA<sub>R10A</sub>) *spa*<sub>SP-SasF</sub> (SpA<sub>SP-SasF</sub>) or pCL55 alone (Vector) were treated  
680 with trypsin to remove SpA. Bacteria were incubated for 20 min to allow for secretion and cell  
681 wall deposition of newly synthesized SpA. Samples were incubated with BODIPY-FL vancomycin  
682 (Vancomycin) (green) to stain the bacterial cell wall and with SpA-specific monoclonal antibody  
683 and Alexa fluor 647-labeled secondary IgG (red) to reveal SpA. (e) SpA-positive staphylococci in  
684 images derived from samples in (d) were analyzed for SpA deposition at the cross wall of  
685 diplococci (n=200). Data from three independent experiments were used to derive the mean



686 ( $\pm$ SEM) and were analyzed for significant differences with one-way ANOVA for comparisons  
687 between wild-type and mutant SpA.  $p$  values were recorded: SpA vs. SpA $_{\Delta IA}$ ,  $p < 0.0001$ ; SpA vs.  
688 SpA $_{S18L}$ ,  $p = 0.0006$ ; SpA vs. SpA $_{R10A}$ ,  $p = 0.0004$ ; SpA vs. SpA $_{SP-SasF}$ ,  $p < 0.0001$ ; SpA vs. Vector,  
689  $p < 0.0001$ . \*\*\*\* denotes  $p < 0.0001$ , \*\*\* denotes  $p < 0.001$ .

690  
691 **Figure 3.** Proteolytic cleavage of the SpA signal peptide. (a) Wild-type SpA $_{ED}$  or SpA $_{ED/\Delta IA}$ ,  
692 SpA $_{ED/S18L}$ , and SpA $_{ED/R10A}$  variants precursors and cleavage products were purified from  
693 detergent-solubilized staphylococcal membranes using affinity chromatography on IgG-  
694 sepharose and analyzed on Coomassie-Blue stained SDS-PAGE. Full length precursors (1) and  
695 their cleavage products (2-4) were analyzed by Edman degradation and MALDI-TOF mass  
696 spectrometry. See Table 1 for mass spectrometry data. (b) Schematic illustrating the proteolytic  
697 cleavage sites for each of the four precursors SpA $_{ED}$ , SpA $_{ED/\Delta IA}$ , SpA $_{ED/S18L}$  and SpA $_{ED/R10A}$ .

698  
699 **Figure 4.** Crosslinking of staphylococcal proteins to SpA $_{ED/S18L}$  or SpA $_{ED/SP-SasF}$ . (a) Bacteria from *S.*  
700 *aureus* WY110 (pSpA $_{ED/S18L}$ ) and *S. aureus* WY110 (pSpA $_{ED/SP-SasF}$ ) cultures were crosslinked with  
701 0.9% formaldehyde, membrane proteins detergent-solubilized and SpA $_{ED/S18L}$  as well as SpA $_{ED/SP-}$   
702  $SasF$ . precursors purified by affinity chromatography on IgG-sepharose. Eluate was treated for 20  
703 min at 90°C to reverse cross-linking or kept at 60°C (cross-linked control) and analyzed on  
704 Coomassie-stained SDS-PAGE. Bands were excised as indicated and individual proteins  
705 identified via ESI-MS analyses of tryptic peptides and data comparison with *in silico* trypsin-  
706 cleaved translation products derived from the genome sequence of *S. aureus*. Immunoblotting

707 of 90°C samples to validate crosslinking of SpA<sub>ED/S18L</sub> staphylococcal proteins (b) and to SecA (c).

708 See Table S1 for a summary of proteins crosslinked to SpA<sub>ED/S18L</sub>.

709

710 **Figure 5.** Depletion of SecA in *S. aureus*. (a) Diagram of the *secA* gene locus in *S. aureus* RN4220

711 (wild-type parent, WT) and its P<sub>spac</sub>-*secA* variant. (b) Bacteria from overnight cultures of wild-

712 type *S. aureus* and *S. aureus* P<sub>spac</sub>-*secA* grown in TSB with 1 mM IPTG were washed and

713 suspended in fresh TSB with or without 1 mM IPTG. Subsequent growth was monitored as

714 increased absorbance at 600 nm (A<sub>600</sub>). After three hours, cultures were diluted 1:100 into fresh

715 TSB with or without 1 mM IPTG and incubated for additional growth measurements. (c) *S.*

716 *aureus* P<sub>spac</sub>-*secA* was streaked on tryptic soy agar with or without 1 mM IPTG supplement and

717 incubated for 16 hours at 37°C for growth. (d) Culture samples retrieved after 3 and 6 hours in

718 (b) were analyzed by immunoblotting with antibodies against SecA ( $\alpha$ SecA).

719

720 **Figure 6.** SecA depletion diminishes septal secretion of SpA in *S. aureus*. (a) SpA precursor

721 processing of [<sup>35</sup>S]methionine pulse-labeled *S. aureus* RN4220 (WT) or *S. aureus* P<sub>spac</sub>-*secA*

722 grown in the presence or absence of 1 mM IPTG. Bacteria were pulse-labeled for 60 sec with

723 radioactive methionine and then incubated with an excess of non-radioactive methionine.

724 During the pulse (0') or 1 (1'), 5 (5') and 20 (20') min after the addition of excess unlabeled

725 methionine, culture aliquots were withdrawn, precipitated with TCA, digested with lysostaphin,

726 and subjected to SDS-PAGE and autoradiography of immunoprecipitated SpA. Wild-type *S.*

727 *aureus* (WT) and its P<sub>spac</sub>-*secA* variant were grown for 3 (b) and 6 hours (d) in the presence or

728 absence of 1 mM IPTG (see Figure 5) and treated with trypsin to remove SpA from the bacterial

729 surface. Bacteria were incubated for 20 min to allow for secretion and cell wall deposition of  
730 newly synthesized SpA. Samples were incubated with BODIPY-FL vancomycin (green) to stain  
731 the bacterial cell wall and with SpA-specific monoclonal antibody and Alexa Fluor 647-labeled  
732 secondary IgG (red) to reveal SpA. As a control for SpA-specific staining, the *S. aureus*  $\Delta spa$   
733 variant grown in the absence of IPTG was analyzed by fluorescence microscopy. (c) SpA-positive  
734 staphylococci in images derived from samples in (b) were analyzed for SpA deposition at the  
735 cross wall of diplococci (n=200). Data from three independent experiments were used to derive  
736 the mean ( $\pm$ SEM), were analyzed for significant differences with one-way ANOVA and *p* values  
737 were recorded: RN4220-IPTG vs. RN4220+IPTG, non-significant (ns); RN4220-IPTG vs. WY223-  
738 IPTG, *p*=0.0003; WY223-IPTG vs. WY223+IPTG, *p*<0.0001, RN4220+IPTG vs. WY223+IPTG, ns. (e)  
739 SecA depletion diminishes secretion of staphylococcal proteins. Protein samples from the  
740 extracellular medium and bacterial pellet of *S. aureus* RN4220 (WT) and *S. aureus*  $P_{spac}\text{-}secA$   
741 cultures grown for 3 hours in the presence or absence of 1 mM IPTG were analyzed by  
742 immunoblotting with antibodies against glycerol-ester hydrolase ( $\alpha$ Geh), nuclease ( $\alpha$ Nuc) and  
743 sortase A ( $\alpha$ SrtA).

744

745 **Figure 7.** SecA localization in staphylococci. (a) Diagram of the *secA* gene locus and of the  
746 pCL55-mediated *att* insertion site for *secA-sfGFP* in the staphylococcal genome. (b) Bacteria  
747 from overnight cultures of *S. aureus* RN4220 (WT), *S. aureus*  $P_{spac}\text{-}secA$  and *S. aureus*  $P_{spac}\text{-}$   
748 *secA/P<sub>tet</sub>-secA:sfGFP* grown in TSB with 1 mM IPTG were washed and suspended in fresh TSB  
749 without IPTG and with or without 1 mM anhydro-tetracycline (ATc); growth was monitored as  
750 increased absorbance at 600 nm ( $A_{600}$ ). After three hours, cultures were diluted 1:100 into fresh

751 TSB without IPTG and with or without 1 mM ATc and incubated for further growth  
752 measurements. (c) Culture samples retrieved after 3 and 6 hours from the experiment detailed  
753 in (b) were analyzed by immunoblotting with rabbit antibodies against SecA ( $\alpha$ SecA) and sfGFP  
754 ( $\alpha$ GFP). (d) [ $^{35}$ S]methionine-labeled *S. aureus* cultures incubated for three hours as described in  
755 (b) were analyzed during the 60 sec pulse with radioactive methionine (0) and 1, 5 and 20 min  
756 after the addition of excess unlabeled methionine via SDS-PAGE and autoradiography of  
757 immunoprecipitated SpA. (e) Fluorescence microscopy of bacteria from *S. aureus* cultures  
758 incubated for three hours as described in (b). Bacteria were stained with the membrane dye  
759 FM4-64 (red) and analyzed for SecA-sfGFP fluorescence (green).

760

761 **Figure 8.** Intracellular trafficking of SpA in the presence and absence of SecA. (a) *S. aureus* P<sub>spac</sub><sup>-</sup>  
762 *secA* cells were grown in the presence (+SecA) or absence of 1 mM IPTG (-SecA) and, alongside  
763 *S. aureus*  $\Delta$ *spa* control cells, were trypsin treated to remove extracellular surface proteins and  
764 fixed with para-formaldehyde. Samples were then treated with lysostaphin (+Lysostaphin) or  
765 left untreated (-Lysostaphin), incubated with detergent and SpA-specific rabbit antibodies and  
766 Alexa Fluor 488-labeled goat-anti-rabbit-IgG (green) and with Nile red to reveal bacterial  
767 membranes. Bright-field microscopy (BF) images were acquired to reveal the contours of all  
768 bacterial cells. Scale bar, 1  $\mu$ m. (b) Additional samples (#1, #2 and #3) of *S. aureus* P<sub>spac</sub>-*SecA*  
769 cells were grown in the presence of 1 mM IPTG (+SecA), trypsin treated, fixed with  
770 formaldehyde, lysostaphin treated, incubated with detergent and with SpA-specific antibody  
771 (green) and Nile red.

772

773 **Figure 9.** SecDF is required for SpA trafficking to septal membranes. (a) *S. aureus* cultures were  
774 centrifuged to sediment the bacteria into a pellet (P) and separate them from the extracellular  
775 medium (S, supernatant). Following lysostaphin digestion of bacteria, proteins in both fractions  
776 were precipitated with TCA and analyzed by immunoblotting with  $\alpha$ SpA. (b) *S. aureus* cultures  
777 were fractionated as described in (a) and subjected to immunoblotting with antibodies specific  
778 for glycerol-ester hydrolase ( $\alpha$ Geh), coagulase ( $\alpha$ Coa) and sortase A ( $\alpha$ SrtA). (c) Fluorescence  
779 microscopy of bacteria from cultures of *S. aureus* RN4220 (WT, wild-type), WY418 ( $\Delta$ secDF),  
780 WY416 ( $\Delta$ rnd2), WY400 ( $\Delta$ rnd3) and WY412 ( $\Delta$ secDF  $\Delta$ rnd23) mutants with and without  
781 expression plasmid for wild-type secDF (pSecDF) as well as *S. aureus* SEJ1 ( $\Delta$ spa) as control.  
782 Bacteria were trypsin treated to remove extracellular surface proteins and fixed with para-  
783 formaldehyde. Samples were treated with lysostaphin, incubated with detergent and SpA-  
784 specific rabbit antibodies and Alexa Fluor 488-labeled goat-anti-rabbit-IgG (green) and with Nile  
785 red to reveal bacterial membranes. BF identifies the bright-field microscopy view of  
786 fluorescence microscopy images. Scale bar, 1  $\mu$ m.

787

788 **Figure 10.** Localization of SpA secretion in LtaS-depleted *S. aureus*. (a) Schematic to illustrate  
789 the *ltaS* locus in *S. aureus* RN4220 and ANG499. (b) Fluorescence microscopy with BODIPY-FL-  
790 vancomycin (green) and  $\alpha$ SpA (red) stained samples 20 min after trypsin removal of surface  
791 proteins from the staphylococcal envelope to detect newly synthesized SpA. Scale bar, 2  $\mu$ m. (c)  
792 SpA-positive staphylococci in images derived from samples in (b) were analyzed for SpA  
793 deposition at the cross wall of diplococci (n=200). Data from three independent experiments  
794 were used to derive the mean ( $\pm$ SEM) and were analyzed for significant differences with one-

795 way ANOVA for comparisons between *S. aureus* RN4220 (WT) and ANG499 grown with (+LtaS)  
796 and without IPTG (-LtaS). *p* values were recorded: RN4220-IPTG vs. ANG499-IPTG, *p* <0.0001;  
797 ANG499-IPTG vs. ANG499+IPTG, *p* <0.0001. (d) Fluorescence microscopy to localize intracellular  
798 SpA in *S. aureus* strains RN4220 (WT) and ANG499 (*P<sub>spac</sub>-ltaS*) grown with and without IPTG  
799 induction for 3 hours. Bacteria were trypsin treated to remove extracellular surface proteins  
800 and fixed with para-formaldehyde. Samples were then treated with lysostaphin, incubated with  
801 detergent and SpA-specific rabbit antibodies and Alexa Fluor 488-labeled goat-anti-rabbit-IgG  
802 (green) and with Nile red to reveal bacterial membranes. BF identifies the bright-field  
803 microscopy view of fluorescence microscopy images. Scale bar, 2  $\mu$ m. (e) The culture  
804 supernatant (S) and bacterial pellet (P) samples of *S. aureus* RN4220 and ANG499 grown for  
805 three hours in the presence or absence of IPTG were immunoblotted with antibodies specific  
806 for SpA ( $\alpha$ SpA), glycerol-ester hydrolase ( $\alpha$ Geh), coagulase ( $\alpha$ Coa), nuclease ( $\alpha$ Nuc) and sortase  
807 A ( $\alpha$ SrtA). (f) Fluorescence microscopy of staphylococci to measure surface display of protein A  
808 in bacteria stained with BODIPY-FL-vancomycin (Van-FL) (green) and  $\alpha$ SpA (red) without trypsin  
809 treatment. Scale bar, 2  $\mu$ m.

810

## 811 References

- 812 ABRAHMSÉN, L., MOKS, T., NILSSON, B., HELLMAN, U. & UHLÉN, M. 1985. Analysis of signals for  
813 secretion in the staphylococcal protein A gene. *EMBO J.*, 4, 3901-3906.
- 814 BAE, T., BANGER, A. K., WALLACE, A., GLASS, E. M., ASLUND, F., SCHNEEWIND, O. & MISSIAKAS,  
815 D. M. 2004. Staphylococcus aureus virulence genes identified by bursa aurealis  
816 mutagenesis and nematode killing. *Proc Natl Acad Sci U S A*, 101, 12312-7.
- 817 BAE, T. & SCHNEEWIND, O. 2003. The YSIRK-G/S motif of staphylococcal protein A and its role in  
818 efficiency of signal peptide processing. *J. Bacteriol.*, 185, 2910-2919.
- 819 BAE, T. & SCHNEEWIND, O. 2006. Allelic replacement in Staphylococcus aureus with inducible  
820 counter-selection. *Plasmid*, 55, 58-63.

- 821 BREGA, S., CALIOT, E., TRIEU-CUOT, P. & DRAMSI, S. 2013. SecA localization and SecA-  
822 dependent secretion occurs at new division septa in group B streptococcus. *PLoS One*, 8,  
823 e65832.
- 824 CAMPO, N., TJALSMA, H., BUIST, G., STEPNIAK, D., MEIJER, M., VEENHUIS, M., WESTERMANN,  
825 M., MULLER, J. P., BRON, S., KOK, J., KUIPERS, O. P. & JONGBLOED, J. D. 2004.  
826 Subcellular sites for bacterial protein export. *Mol. Microbiol.*, 53, 1583-1599.
- 827 CARLSSON, F., STALHAMMAR-CARLEMALM, M., FLARDH, K., SANDIN, C., CARLEMALM, E. &  
828 LINDAHL, G. 2006. Signal sequence directs localized secretion of bacterial surface  
829 proteins. *Nature*, 442, 943-946.
- 830 CHENG, A. G., MISSIAKAS, D. M. & SCHNEEWIND, O. 2014. The giant protein Ebh is a cross wall  
831 determinant of *Staphylococcus aureus* cell size and complement resistance. *J. Bacteriol.*,  
832 196, 971-981.
- 833 COLE, R. M. & HAHN, J. J. 1962. Cell wall replication in *Streptococcus pyogenes*. *Science*, 135,  
834 722-724.
- 835 DEDENT, A. C., MCADOW, M. & SCHNEEWIND, O. 2007. Distribution of protein A on the surface  
836 of *Staphylococcus aureus*. *J. Bacteriol.*, 189, 4473-4484.
- 837 DEDENT, A. C., MISSIAKAS, D. M. & SCHNEEWIND, O. 2008. Signal peptides direct surface  
838 proteins to two distinct envelope locations of *Staphylococcus aureus*. *EMBO J.*, 27, 2656-  
839 2668.
- 840 EMR, S. D., HANLEY-WAY, S. & SILHAVY, T. J. 1981. Suppressor mutations that restore export of  
841 a protein with a defective signal sequence. *Cell*, 23, 79-88.
- 842 EMR, S. D., SCHWARTZ, M. & SILHAVY, T. J. 1978. Mutations altering the cellular localization of  
843 the phage lambda receptor, an *Escherichia coli* outer membrane protein. *Proc. Natl.*  
844 *Acad. Sci USA*, 75, 5802-6.
- 845 FORSGREN, A. & SJÖQUIST, J. 1966. Protein A from *S. aureus*. I. Pseudo-immune reaction with  
846 human gamma-globulin. *J. Immunol.*, 97, 822-827.
- 847 FOSTER, T. J., GEOGHEGAN, J. A., GANESH, V. K. & HÖÖK, M. 2014. Adhesion, invasion and  
848 evasion: the many functions of the surface proteins of *Staphylococcus aureus*. *Nat. Rev.*  
849 *Microbiol.*, 12, 49-62.
- 850 FRANKEL, M. B., HENDRICKX, A. P., MISSIAKAS, D. M. & SCHNEEWIND, O. 2011. LytN, a murein  
851 hydrolase in the cross-wall compartment of *Staphylococcus aureus*, is involved in proper  
852 bacterial growth and envelope assembly. *J. Biol. Chem.*, 286, 32593-32605.
- 853 GARDEL, C., BENSON, S., HUNT, J., MICHAELIS, S. & BECKWITH, J. 1987. *secD*, a new gene  
854 involved in protein export in *Escherichia coli*. *J. Bacteriol.*, 169, 1286-1290.
- 855 GIESBRECHT, P., WECKE, J. & REINICKE, B. 1976. On the morphogenesis of the cell wall of  
856 staphylococci. *Int. Rev. Cytol.*, 44, 225-318.
- 857 GRÜNDLING, A. & SCHNEEWIND, O. 2007. Synthesis of glycerol phosphate lipoteichoic acid in  
858 *Staphylococcus aureus*. *Proc. Nat. Acad. Sci. USA*, 104, 8478-8483.
- 859 HANAHAH, D. 1983. Studies on transformation of *Escherichia coli* with plasmids. *J Mol Biol*, 166,  
860 557-80.
- 861 HARRY, E. J., POGLIANO, K. & LOSICK, R. 1995. Use of immunofluorescence to visualize cell-  
862 specific gene expression during sporulation in *Bacillus subtilis*. *J. Bacteriol.*, 177, 3386-  
863 3393.



- 864 HU, P., BIAN, Z., FAN, M., HUANG, M. & ZHANG, P. 2008. Sec translocase and sortase A are  
865 colocalised in a locus in the cytoplasmic membrane of *Streptococcus mutans*. *Arch. Oral*  
866 *Biol.*, 53, 150-154.
- 867 KIM, H. K., CHENG, A. G., KIM, H. Y., MISSIAKAS, D. M. & SCHNEEWIND, O. 2010. Nontoxicogenic  
868 protein A vaccine for methicillin-resistant *Staphylococcus aureus* infections in mice. *J*  
869 *Exp Med*, 207, 1863-70.
- 870 KIM, H. K., FALUGI, F., MISSIAKAS, D. & SCHNEEWIND, O. 2016. Peptidoglycan-linked protein A  
871 promotes T-cell dependent antibody expansion during *Staphylococcus aureus* infection.  
872 *Proc. Natl. Acad. Sci. USA*, 113, 5718-5723.
- 873 KLINE, K. A., KAU, A. L., CHEN, S. L., LIM, A., PINKNER, J. S., ROSCH, J., NALLAPAREDDY, S. R.,  
874 MURRAY, B. E., HENRIQUES-NORMARK, B., BEATTY, W., CAPARON, M. G. & HULTGREN,  
875 S. J. 2009. Mechanism for sortase localization and the role of sortase localization in  
876 efficient pilus assembly in *Enterococcus faecalis*. *J. Bacteriol.*, 191, 3237-3247.
- 877 KREISWIRTH, B. N., LOFDAHL, S., BETLEY, M. J., O'REILLY, M., SCHLIEVERT, P. M., BERGDOLL, M.  
878 S. & NOVICK, R. P. 1983. The toxic shock syndrome exotoxin structural gene is not  
879 detectably transmitted by a prophage. *Nature*, 305, 709-12.
- 880 LEE, C. Y., BURANEN, S. L. & YE, Z. H. 1991. Construction of single-copy integration vectors for  
881 *Staphylococcus aureus*. *Gene*, 103, 101-5.
- 882 LEE, C. Y. & IANDOLO, J. J. 1986. Lysogenic conversion of staphylococcal lipase is caused by  
883 insertion of the bacteriophage L54a genome into the lipase structural gene. *J. Bacteriol.*,  
884 166, 385-391.
- 885 LUTKENHAUS, J. 1993. FtsZ ring in bacterial cytokinesis. *Mol. Microbiol.*, 9, 403-409.
- 886 MANN, P. A., MÜLLER, A., XIAO, L., PEREIRA, P. M., YANG, C., HO LEE, S., WANG, H., TRZECIAK,  
887 J., SCHNEEWEIS, J., DOS SANTOS, M. M., MURGOLO, N., SHE, X., GILL, C., BALIBAR, C. J.,  
888 LABROLI, M., SU, J., FLATTERY, A., SHERBORNE, B., MAIER, R., TAN, C. M., BLACK, T.,  
889 ONDER, K., KARGMAN, S., MONSMA, F. J. J., PINHO, M. G., SCHNEIDER, T. & ROEMER, T.  
890 2013. Murgocil is a highly bioactive staphylococcal-specific inhibitor of the  
891 peptidoglycan glycosyltransferase enzyme MurG. *ACS Chem. Biol.*, Epub, ahead of print.
- 892 MAZMANIAN, S. K., LIU, G., TON-THAT, H. & SCHNEEWIND, O. 1999. *Staphylococcus aureus*  
893 sortase, an enzyme that anchors surface proteins to the cell wall. *Science*, 285, 760-763.
- 894 MONK, I. R., SHAH, I. M., XU, M., TAN, M. W. & FOSTER, T. J. 2012. Transforming the  
895 untransformable: application of direct transformation to manipulate genetically  
896 *Staphylococcus aureus* and *Staphylococcus epidermidis*. *MBio*, 3.
- 897 MONTEIRO, J. M., FERNANDES, P. B., VAZ, F., PEREIRA, A. R., TAVARES, A. C., FERREIRA, M. T.,  
898 PEREIRA, P. M., VEIGA, H., KURU, E., VANNIEUWENHZE, M. S., BRUN, Y. V., FILIPE, S. R. &  
899 PINHO, M. G. 2015. Cell shape dynamics during the staphylococcal cell cycle. *Nat.*  
900 *Commun.*, 6, 8055.
- 901 NAVARRE, W. W. & SCHNEEWIND, O. 1994. Proteolytic cleavage and cell wall anchoring at the  
902 LPXTG motif of surface proteins in gram-positive bacteria. *Mol. Microbiol.*, 14, 115-121.
- 903 OLIVER, D. B. & BECKWITH, J. 1981. *E. coli* mutant pleiotropically defective in the export of secreted  
904 proteins. *Cell*, 25, 765-772.
- 905 PEDELACQ, J. D., CABANTOUS, S., TRAN, T., TERWILLIGER, T. C. & WALDO, G. S. 2006.  
906 Engineering and characterization of a superfolder green fluorescent protein. *Nat.*  
907 *Biotechnol.*, 24, 79-88.



- 908 PERCY, M. G. & GRÜNDLING, A. 2014. Lipoteichoic acid synthesis and function in gram-positive  
909 bacteria. *Annu. Rev. Microbiol.*, 68, 81-100.
- 910 PERRY, A. M., TON-THAT, H., MAZMANIAN, S. K. & SCHNEEWIND, O. 2002. Anchoring of surface  
911 proteins to the cell wall of *Staphylococcus aureus*. III. Lipid II is an *in vivo* peptidoglycan  
912 substrate for sortase-catalyzed surface protein anchoring. *J. Biol. Chem.*, 277, 16241-  
913 16248.
- 914 PHONIMDAENG, P., O'REILLY, M., NOWLAN, P., BRAMLEY, A. J. & FOSTER, T. J. 1990. The  
915 coagulase of *Staphylococcus aureus* 8325-4. Sequence analysis and virulence of site-  
916 specific coagulase-deficient mutants. *Mol. Microbiol.*, 4, 393-404.
- 917 PINHO, M. G. & ERRINGTON, J. 2003. Dispersed mode of *Staphylococcus aureus* cell wall  
918 synthesis in the absence of the division machinery. *Mol. Microbiol.*, 50, 871-881.
- 919 PINHO, M. G. & ERRINGTON, J. 2005. Recruitment of penicillin-binding protein PBP2 to the  
920 division site of *Staphylococcus aureus* is dependent on its transpeptidation substrates.  
921 *Mol. Microbiol.*, 55, 799-807.
- 922 POGLIANO, J. A. & BECKWITH, J. 1994. SecD and SecF facilitate protein export in *Escherichia*  
923 *coli*. *EMBO J.*, 13, 554-561.
- 924 QUIBLIER, C., SEIDL, K., ROSCHITZKI, B., ZINKERNAGEL, A. S., BERGER-BÄCHI, B. & SENN, M. M.  
925 2013. Secretome analysis defines the major role of SecDF in *Staphylococcus aureus*  
926 virulence. *PLoS One*, 8, e63513.
- 927 QUIBLIER, C., ZINKERNAGEL, A. S., SCHUEPBACH, R. A., BERGER-BÄCHI, B. & SENN, M. M. 2011.  
928 Contribution of SecDF to *Staphylococcus aureus* resistance and expression of virulence  
929 factors. *BMC Microbiol.*, 11, 72.
- 930 RAVIPATY, S. & REILLY, J. P. 2010. Comprehensive characterization of methicillin-resistant  
931 *Staphylococcus aureus* subsp. *aureus* COL secretome by two-dimensional liquid  
932 chromatography and mass spectrometry. *Mol. Cell. Proteomics*, 9, 1898-1919.
- 933 REICHMANN, N. T., PIÇARRA CASSONA, C., MONTEIRO, J. M., BOTTOMLEY, A. L., CORRIGAN, R.  
934 M., FOSTER, S. J., PINHO, M. G. & GRÜNDLING, A. 2014. Differential localization of LTA  
935 synthesis proteins and their interaction with the cell division machinery in  
936 *Staphylococcus aureus*. *Mol. Microbiol.*, 92, 273-286.
- 937 ROHRER, S., EHLERT, K., TSCHERSKE, M., LABISCHINSKI, H. & BERGER-BÄCHI, B. 1999. The  
938 essential *Staphylococcus aureus* gene *fmbB* is involved in the first step of peptidoglycan  
939 pentaglycine interpeptide formation. *Proc. Natl. Acad. Sci. USA*, 96, 9351-9356.
- 940 ROSCH, J. & CAPARON, M. 2004. A microdomain for protein secretion in Gram-positive bacteria.  
941 *Science*, 304, 1513-1515.
- 942 ROSENSTEIN, R. & GÖTZ, F. 2000. Staphylococcal lipases:biochemical and molecular  
943 characterization. *Biochimie*, 82, 1005-1014.
- 944 SCHALLENBERGER, M. A., NIESSEN, S., SHAO, C., FOWLER, B. J. & ROMESBERG, F. E. 2012. Type I  
945 signal peptidase and protein secretion in *Staphylococcus aureus*. *J. Bacteriol.*, 194, 2677-  
946 2686.
- 947 SCHNEEWIND, O., FOWLER, A. & FAULL, K. F. 1995. Structure of the cell wall anchor of surface  
948 proteins in *Staphylococcus aureus*. *Science*, 268, 103-106.
- 949 SCHNEEWIND, O., MIHAYLOVA-PETKOV, D. & MODEL, P. 1993. Cell wall sorting signals in  
950 surface proteins of gram-positive bacteria. *EMBO J*, 12, 4803-11.

- 951 SCHNEEWIND, O. & MISSIAKAS, D. 2014. Genetic manipulation of *Staphylococcus aureus*. *Curr*  
952 *Protoc Microbiol*, 32, Unit 9C 3.
- 953 SCHNEEWIND, O., MODEL, P. & FISCHETTI, V. A. 1992. Sorting of protein A to the staphylococcal  
954 cell wall. *Cell*, 70, 267-281.
- 955 SCHNEIDER, C. A., RASBAND, W. S. & ELICEIRI, K. W. 2012. NIH Image to ImageJ: 25 years of  
956 image analysis. *Nat Methods*, 9, 671-5.
- 957 SHORTLE, D. 1983. A genetic system for analysis of staphylococcal nuclease. *Gene*, 22, 181-189.
- 958 STEELE, V. R., BOTTOMLEY, A. L., GARCIA-LARA, J., KASTURIARACHCHI, J. & FOSTER, S. J. 2011.  
959 Multiple essential roles for EzrA in cell division of *Staphylococcus aureus*. *Mol.*  
960 *Microbiol.*, 80, 542-555.
- 961 TETTELIN, H., MASIGNANI, V., CIESLEWICZ, M. J., DONATI, C., MEDINI, D., WARD, N. L.,  
962 ANGIUOLI, S. V., CRABTREE, J., JONES, A. L., DURKIN, A. S., DEBOY, R. T., DAVIDSEN, T.  
963 M., MORA, M., SCARSELLI, M., MARGARIT Y ROS, I., PETERSON, J. D., HAUSER, C. R.,  
964 SUNDARAM, J. P., NELSON, W. C., MADUPU, R., BRINKAC, L. M., DODSON, R. J.,  
965 ROISOVITZ, M. J., SULLIVAN, S. A., DAUGHERTY, S. C., HAFT, D. H., SELENGUT, J., GWINN,  
966 M. L., ZHOU, L., ZAFAR, N., KHOURI, H., RADUNE, D., DIMITROV, G., WATKINS, K.,  
967 O'CONNOR, K. J., SMITH, S., UTTERBACK, T. R., WHITE, O., RUBENS, C. E., GRANDI, G.,  
968 MADOFF, L. C., KASPER, D. L., TELFORD, J. L., WESSELS, M. R., RAPPUOLI, R. & FRASER, C.  
969 M. 2005. Genome analysis of multiple pathogenic isolates of *Streptococcus agalactiae*:  
970 implications for the microbial "pan-genome". *Proc. Natl. Acad. Sci. USA*, 102, 13950-  
971 13955.
- 972 TON-THAT, H., FAULL, K. F. & SCHNEEWIND, O. 1997. Anchor structure of staphylococcal  
973 surface proteins. I. A branched peptide that links the carboxyl terminus of proteins to  
974 the cell wall. *J. Biol. Chem.*, 272, 22285-22292.
- 975 TON-THAT, H., LIU, G., MAZMANIAN, S. K., FAULL, K. F. & SCHNEEWIND, O. 1999. Purification  
976 and characterization of sortase, the transpeptidase that cleaves surface proteins of  
977 *Staphylococcus aureus* at the LPXTG motif. *Proc. Natl. Acad. Sci. USA*, 96, 12424-12429.
- 978 TON-THAT, H., MAZMANIAN, H., FAULL, K. F. & SCHNEEWIND, O. 2000. Anchoring of surface  
979 proteins to the cell wall of *Staphylococcus aureus*. I. Sortase catalyzed *in vitro*  
980 transpeptidation reaction using LPXTG peptide and NH<sub>2</sub>-Gly<sub>3</sub> substrates. *J. Biol. Chem.*,  
981 275, 9876-9881.
- 982 TON-THAT, H. & SCHNEEWIND, O. 1999. Anchor structure of staphylococcal surface proteins.  
983 IV. Inhibitors of the cell wall sorting reaction. *J. Biol. Chem.*, 274, 24316-24320.
- 984 TOUHAMI, A., JERICHO, M. H. & BEVERIDGE, T. J. 2004. Atomic force microscopy of cell growth  
985 and division in *Staphylococcus aureus*. *J. Bacteriol.*, 186, 3286-3295.
- 986 TSIRIGOTAKI, A., DE GEYTER, J., ŠOŠTARIC, N., ECONOMOU, A. & KARAMANOU, S. 2017. Protein  
987 export through the bacterial Sec pathway. *Nat. Rev. Microbiol.*, 15, 21-36.
- 988 TSUI, H. C., KEEN, S. K., SHAM, L. T., WAYNE, K. J. & WINKLER, M. E. 2011. Dynamic distribution  
989 of the SecA and SecY translocase subunits and septal localization of the HtrA surface  
990 chaperone/protease during *Streptococcus pneumoniae* D39 cell division. *MBio*, 2,  
991 e00202-11.
- 992 TSUKAZAKI, T., MORI, H., ECHIZEN, Y., ISHITANI, R., FUKAI, S., TANAKA, T., PEREDERINA, A.,  
993 VASSYLYEV, D. G., KOHNO, T., MATURANA, A. D., ITO, K. & NUREKI, O. 2011. Structure

994           and function of a membrane component SecDF that enhances protein export. *Nature*,  
995           474, 235-238.

996   TZAGOLOFF, H. & NOVICK, R. 1977. Geometry of cell division in *Staphylococcus aureus*. *J.*  
997           *Bacteriol.*, 129, 343-350.

998   UHLÉN, M., GUSS, B., NILSSON, B., GOTZ, F. & LINDBERG, M. 1984. Expression of the gene  
999           encoding protein A in *Staphylococcus aureus* and coagulase-negative staphylococci. *J.*  
1000           *Bacteriol.*, 159, 713-719.

1001   VON HEIJNE, G. 1986. Towards a comparative anatomy of N-terminal topogenic protein  
1002           sequences. *J. Mol. Biol.*, 189, 239-42.

1003   YU, W. & GÖTZ, F. 2012. Cell wall antibiotics provoke accumulation of anchored mCherry in the  
1004           cross wall of *Staphylococcus aureus*. *PLoS One*, 7, e30076.

1005

1006

1007

**Table 1. MALDI-TOF-MS ion signals of purified SpA<sub>ED</sub> species and their variants**

| Protein                   | Observed <i>m/z</i> | <sup>a</sup> Calculated <i>m/z</i> | Δobs.- calc. |
|---------------------------|---------------------|------------------------------------|--------------|
| SpA <sub>ED</sub> -1      | 16776.47            | 16777.7                            | 1.23         |
| SpA <sub>ED</sub> -2      | 15273.92            | 15273.78                           | 0.14         |
| SpA <sub>ED</sub> -3      | 14418.92            | 14418.78                           | 0.14         |
| SpA <sub>ED</sub> -4      | 13152.40            | 13152.32                           | 0.08         |
| SpA <sub>ED/S18L</sub> -1 | 16803.02            | 16803.78                           | 0.76         |
| SpA <sub>ED/S18L</sub> -2 | 15298.89            | 15299.86                           | 0.97         |
| SpA <sub>ED/S18L</sub> -3 | 14417.89            | 14418.78                           | 0.89         |
| SpA <sub>ED/S18L</sub> -4 | 13152.22            | 13152.32                           | 0.10         |
| SpA <sub>ED/ΔIA</sub> -1  | 16592.95            | 16593.46                           | 0.51         |
| SpA <sub>ED/ΔIA</sub> -2  | 15088.71            | 15089.54                           | 0.83         |
| SpA <sub>ED/ΔIA</sub> -3  | 14417.86            | 14418.78                           | 0.92         |
| SpA <sub>ED/ΔIA</sub> -4  | 13151.55            | 13152.32                           | 0.77         |
| SpA <sub>ED/R10A</sub> -1 | 16692.99            | 16692.59                           | 0.40         |
| SpA <sub>ED/R10A</sub> -2 | 15584.97            | 15586.2                            | 1.23         |
| SpA <sub>ED/R10A</sub> -3 | 14418.46            | 14418.78                           | 0.32         |
| SpA <sub>ED/R10A</sub> -4 | 13152.07            | 13152.32                           | 0.25         |

<sup>a</sup>Based on average mass calculated with the online EXPASy tool.

1008

1009

1010  
1011

**Table S1. List of ESI-MS identified tryptic peptides crosslinked to SpA<sub>ED/S18L</sub>**

| Number | Gene Locus or Symbol                                                 | UniProt reference     |
|--------|----------------------------------------------------------------------|-----------------------|
| 26     | <i>secA</i>                                                          | (O06446_SECA_STAA8)   |
| 21     | <i>alaS</i>                                                          | (Q2FXV9_SYA_STAA8)    |
| 18     | <i>murG</i>                                                          | (Q2FYL5_MURG_STAA8)   |
| 15     | <i>polA</i>                                                          | (Q2FXN9_Q2FXN9_STAA8) |
| 15     | SAOUHSC_01854                                                        | (Q2G245_Q2G245_STAA8) |
| 15     | <i>femA</i>                                                          | (Q2FYR2_FEMA_STAA8)   |
| 11     | <i>clpC</i>                                                          | (Q2G0P5_CLPC_STAA8)   |
| 10     | SAOUHSC_01810                                                        | (Q2FXM5_Q2FXM5_STAA8) |
| 10     | <i>ezrA</i>                                                          | (Q2FXK8_EZRA_STAA8)   |
| 9      | <i>pbp2</i>                                                          | (Q2FYI0_Q2FYI0_STAA8) |
| 9      | <i>murE2</i>                                                         | (Q2FWZ9_Q2FWZ9_STAA8) |
| 9      | UDP-N-acetylglucosamine<br>pyrophosphorylase                         | (Q2FW81_URTF_STAA8)   |
| 9      | <i>femB</i>                                                          | (Q2FYR1_FEMB_STAA8)   |
| 9      | <i>tagB</i>                                                          | (Q2G1C2_Q2G1C2_STAA8) |
| 8      | <i>tagF</i>                                                          | (Q2G1C1_Q2G1C1_STAA8) |
| 7      | <i>ltaS</i>                                                          | (Q2G093_LTAS_STAA8)   |
| 7      | <i>femX</i>                                                          | (Q2FVZ4_FEMX_STAA8)   |
| 6      | 1-acyl-sn-glycerol-3-phosphate<br>acyltransferases domain<br>protein | (Q2FXJ7_Q2FXJ7_STAA8) |
| 6      | <i>purl</i>                                                          | (Q2FZJ0_PURL_STAA8)   |
| 6      | Conserved hypothetical phage                                         | (Q2FY82_Q2FY82_STAA8) |

|   | protein       |                       |
|---|---------------|-----------------------|
| 6 | SAOUHSC_02447 | (Q2G2D7_Q2G2D7_STAA8) |
| 6 | SAOUHSC_01347 | (Q2FYS9_Q2FYS9_STAA8) |
| 6 | SAOUHSC_01180 | (Q2G264_Q2G264_STAA8) |
| 5 | <i>clpB</i>   | (Q2FZS8_Q2FZS8_STAA8) |
| 5 | <i>dltD</i>   | (Q2FZW3_Q2FZW3_STAA8) |
| 5 | <i>cshA</i>   | (Q2FWH5_Y2316_STAA8)  |
| 5 | <i>prfC</i>   | (Q2FZP4_RF3_STAA8)    |
| 5 | <i>parE</i>   | (Q2FYS5_PARE_STAA8)   |
| 5 | <i>parC</i>   | (Q2FYS4_PARC_STAA8)   |
| 5 | <i>betA</i>   | (Q2FV11_BETA_STAA8)   |
| 5 | SAOUHSC_02417 | (Q2FW86_Q2FW86_STAA8) |
| 5 | SAOUHSC_02274 | (Q2FWL5_Q2FWL5_STAA8) |
| 5 | SAOUHSC_01960 | (Q2FXA5_Q2FXA5_STAA8) |
| 5 | SAOUHSC_01908 | (Q2G1W5_Q2G1W5_STAA8) |
| 5 | SAOUHSC_01613 | (Q2FY52_Q2FY52_STAA8) |
| 5 | SAOUHSC_01026 | (Q2FZH8_Q2FZH8_STAA8) |
| 5 | SAOUHSC_00309 | (Q2G146_Q2G146_STAA8) |
| 5 | SAOUHSC_00113 | (Q2G1K9_Q2G1K9_STAA8) |
| 4 | <i>saeS</i>   | (Q2G2U1_SAES_STAA8)   |
| 4 | <i>rplK</i>   | (P0A0F4_RL11_STAA8)   |
| 4 | <i>rplE</i>   | (Q2FW18_RL5_STAA8)    |
| 4 | <i>murC</i>   | (Q2FXJ0_MURC_STAA8)   |
| 4 | <i>metN2</i>  | (Q2FZZ2_METN2_STAA8)  |
| 4 | <i>lip2</i>   | (Q2G155_LIP2_STAA8)   |
| 4 | SAOUHSC_02859 | (Q2FV77_Q2FV77_STAA8) |
| 4 | SAOUHSC_02582 | (Q2FVV9_FDHL_STAA8)   |
| 4 | SAOUHSC_02363 | (Q2FWD6_ALD1_STAA8)   |
| 4 | SAOUHSC_01884 | (Q2FXG3_Q2FXG3_STAA8) |

|   |               |                       |
|---|---------------|-----------------------|
| 4 | SAOUHSC_01855 | (Q2G247_Y1855_STAA8)  |
| 4 | SAOUHSC_01723 | (Q2FXV8_Q2FXV8_STAA8) |
| 4 | SAOUHSC_01679 | (Q2FXZ6_Q2FXZ6_STAA8) |
| 4 | SAOUHSC_01460 | (Q2FYI6_Q2FYI6_STAA8) |
| 4 | SAOUHSC_01321 | (Q2FYV3_Q2FYV3_STAA8) |
| 4 | SAOUHSC_00893 | (Q2FZU7_Q2FZU7_STAA8) |
| 4 | SAOUHSC_00637 | (Q2G2L2_Q2G2L2_STAA8) |
| 4 | SAOUHSC_00531 | (Q2G0M9_Q2G0M9_STAA8) |
| 3 | <i>tgt</i>    | (Q2FXT6_TGT_STAA8)    |
| 3 | <i>queA</i>   | (Q2FXT5_QUEA_STAA8)   |
| 3 | <i>prs</i>    | (Q2G0S2_Q2G0S2_STAA8) |
| 3 | <i>pcrA</i>   | (Q53727_PCRA_STAA8)   |
| 3 | <i>hemE</i>   | (Q2FXA3_DCUP_STAA8)   |
| 3 | <i>gyrA</i>   | (Q2G2Q0_GYRA_STAA8)   |
| 3 | <i>gpsA</i>   | (Q2FYG1_GPDA_STAA8)   |
| 3 | <i>glmU</i>   | (Q2G0S3_GLMU_STAA8)   |
| 3 | SAOUHSC_02684 | (Q2FVL8_Q2FVL8_STAA8) |
| 3 | SAOUHSC_02627 | (Q2G2W3_Q2G2W3_STAA8) |
| 3 | SAOUHSC_02317 | (Q2FWH4_Q2FWH4_STAA8) |
| 3 | SAOUHSC_02134 | (Q2G234_Q2G234_STAA8) |
| 3 | SAOUHSC_01973 | (Q2G2T1_Q2G2T1_STAA8) |
| 3 | SAOUHSC_01728 | (Q2FXV3_Q2FXV3_STAA8) |
| 3 | SAOUHSC_01673 | (Q2FY01_Q2FY01_STAA8) |
| 3 | SAOUHSC_01612 | (Q2FY53_Q2FY53_STAA8) |
| 3 | SAOUHSC_01584 | (Q2FY81_Q2FY81_STAA8) |
| 3 | SAOUHSC_01499 | (Q2FYF3_Q2FYF3_STAA8) |
| 3 | SAOUHSC_01490 | (Q2FYG2_Q2FYG2_STAA8) |
| 3 | SAOUHSC_01071 | (Q2FZF9_Q2FZF9_STAA8) |
| 3 | SAOUHSC_00875 | (Q2FZW0_Q2FZW0_STAA8) |

|   |               |                       |
|---|---------------|-----------------------|
| 3 | SAOUHSC_00756 | (Q2G065_Q2G065_STAA8) |
| 3 | SAOUHSC_00731 | (Q2G089_Q2G089_STAA8) |
| 3 | SAOUHSC_00584 | (Q2G011_Q2G011_STAA8) |
| 3 | SAOUHSC_00480 | (Q2G0R6_Q2G0R6_STAA8) |
| 3 | SAOUHSC_00467 | (Q2G0S7_Q2G0S7_STAA8) |
| 3 | SAOUHSC_00139 | (Q2G1I3_Q2G1I3_STAA8) |
| 2 | <i>pknB</i>   | (Q2FZ64_Q2FZ64_STAA8) |
| 2 | <i>tsaD</i>   | (Q2FWL2_TSAD_STAA8)   |
| 2 | <i>topB</i>   | (Q2FW03_TOP3_STAA8)   |
| 2 | <i>topA</i>   | (Q2FZ32_TOP1_STAA8)   |
| 2 | <i>rsmH</i>   | (P60393_RSMH_STAA8)   |
| 2 | <i>rsmA</i>   | (Q2G0T0_RSMA_STAA8)   |
| 2 | <i>rpsG</i>   | (P48940_RS7_STAA8)    |
| 2 | <i>rpsC</i>   | (Q2FW12_RS3_STAA8)    |
| 2 | <i>rplM</i>   | (Q2FW38_RL13_STAA8)   |
| 2 | <i>rplI</i>   | (Q2G2T3_RL9_STAA8)    |
| 2 | <i>rplF</i>   | (Q2FW21_RL6_STAA8)    |
| 2 | <i>potA</i>   | (Q2G2A7_POTA_STAA8)   |
| 2 | <i>mutS</i>   | (Q2FYZ9_MUTS_STAA8)   |
| 2 | <i>murE</i>   | (Q2FZP6_MURE_STAA8)   |
| 2 | <i>lysA</i>   | (Q2FYN4_Q2FYN4_STAA8) |
| 2 | <i>gcvT</i>   | (Q2FY33_GCST_STAA8)   |
| 2 | <i>fmt</i>    | (Q2FZ68_FMT_STAA8)    |
| 2 | <i>ebpS</i>   | (Q2FYF1_EBPS_STAA8)   |
| 2 | <i>dnaJ</i>   | (Q2FXZ3_DNAJ_STAA8)   |
| 2 | <i>atpG</i>   | (Q2FWE9_Q2FWE9_STAA8) |
| 2 | <i>aroC</i>   | (Q2FYG9_AROC_STAA8)   |
| 2 | <i>alr1</i>   | (Q9ZAH5_ALR1_STAA8)   |
| 2 | <i>ald2</i>   | (Q2FXL7_DHA2_STAA8)   |



|   |               |                       |
|---|---------------|-----------------------|
| 2 | SAOUHSC_02980 | (Q2G220_Q2G220_STAA8) |
| 2 | SAOUHSC_02899 | (Q2FV40_Q2FV40_STAA8) |
| 2 | SAOUHSC_02875 | (Q2FV62_Q2FV62_STAA8) |
| 2 | SAOUHSC_02382 | (Q2FWB6_Q2FWB6_STAA8) |
| 2 | SAOUHSC_02145 | (Q2FWX6_Q2FWX6_STAA8) |
| 2 | SAOUHSC_02133 | (Q2G235_Q2G235_STAA8) |
| 2 | SAOUHSC_01998 | (Q2G281_Q2G281_STAA8) |
| 2 | SAOUHSC_01816 | (Q2FXL9_Y1816_STAA8)  |
| 2 | SAOUHSC_01794 | (Q2FXP2_Q2FXP2_STAA8) |
| 2 | SAOUHSC_01791 | (Q2FXP5_Q2FXP5_STAA8) |
| 2 | SAOUHSC_01766 | (Q2FXR9_Q2FXR9_STAA8) |
| 2 | SAOUHSC_01660 | (Q2FY14_Q2FY14_STAA8) |
| 2 | SAOUHSC_01615 | (Q2FY50_Q2FY50_STAA8) |
| 2 | SAOUHSC_01606 | (Q2FY59_Q2FY59_STAA8) |
| 2 | SAOUHSC_01486 | (Q2FYG6_Q2FYG6_STAA8) |
| 2 | SAOUHSC_01249 | (Q2G2Q2_Q2G2Q2_STAA8) |
| 2 | SAOUHSC_01199 | (Q2FZ53_Q2FZ53_STAA8) |
| 2 | SAOUHSC_01184 | (Q2FZ67_Q2FZ67_STAA8) |
| 2 | SAOUHSC_01054 | (Q2G2G7_Y1054_STAA8)  |
| 2 | SAOUHSC_01014 | (Q2FZI9_Q2FZI9_STAA8) |
| 2 | SAOUHSC_00834 | (Q2G000_Q2G000_STAA8) |
| 2 | SAOUHSC_00794 | (Q2G033_Q2G033_STAA8) |
| 2 | SAOUHSC_00508 | (Q2G242_Q2G242_STAA8) |
| 2 | SAOUHSC_00442 | (Q2G0T5_Q2G0T5_STAA8) |
| 1 | <i>yajC</i>   | (Q2FXT7_Q2FXT7_STAA8) |
| 1 | <i>secDF</i>  | (Q2FXT8_Q2FXT8_STAA8) |
| 1 | <i>scaH</i>   | (Q2G222_Y2979_STAA8)  |
| 1 | <i>murl</i>   | (Q2FZC6_MURI_STAA8)   |
| 1 | <i>msrR</i>   | (Q7BHL7_MSRR_STAA8)   |

|   |              |                       |
|---|--------------|-----------------------|
| 1 | <i>msrB</i>  | (P0A088_MSRB_STAA8)   |
| 1 | <i>xerD</i>  | (Q2FY74_Q2FY74_STAA8) |
| 1 | <i>uvrC</i>  | (Q2FZD0_UVRC_STAA8)   |
| 1 | <i>uvrA</i>  | (Q2G046_Q2G046_STAA8) |
| 1 | <i>ugtP</i>  | (Q2FZP7_UGTP_STAA8)   |
| 1 | <i>tagX</i>  | (O05154_TAGX_STAA8)   |
| 1 | <i>srrB</i>  | (Q2FY80_SRRB_STAA8)   |
| 1 | <i>sarZ</i>  | (Q2FVN3_SARZ_STAA8)   |
| 1 | <i>sarS</i>  | (Q2G1N7_SARS_STAA8)   |
| 1 | <i>sarR</i>  | (Q9F0R1_SARR_STAA8)   |
| 1 | <i>sarA</i>  | (Q2G2U9_SARA_STAA8)   |
| 1 | <i>gdpp</i>  | (Q2G2T6_Q2G2T6_STAA8) |
| 1 | <i>ruvB</i>  | (Q2FXT4_RUVB_STAA8)   |
| 1 | <i>rpsL</i>  | (P0A0H0_RS12_STAA8)   |
| 1 | <i>rpsD</i>  | (Q2FXK6_RS4_STAA8)    |
| 1 | <i>rpmI</i>  | (Q2FXQ0_RL35_STAA8)   |
| 1 | <i>rplW</i>  | (Q2FW08_RL23_STAA8)   |
| 1 | <i>rplP</i>  | (Q2FW13_RL16_STAA8)   |
| 1 | <i>rplN</i>  | (Q2FW16_RL14_STAA8)   |
| 1 | <i>rot</i>   | (Q9RFJ6_ROT_STAA8)    |
| 1 | <i>rrn</i>   | (Q2G024_Q2G024_STAA8) |
| 1 | <i>recG</i>  | (O50581_RECG_STAA8)   |
| 1 | <i>pyrF</i>  | (Q2FZ71_PYRF_STAA8)   |
| 1 | <i>putP</i>  | (Q2FWY7_PUTP_STAA8)   |
| 1 | <i>nusG</i>  | (Q2G0P2_NUSG_STAA8)   |
| 1 | <i>mutS2</i> | (Q2FZD3_MUTS2_STAA8)  |
| 1 | <i>mgo</i>   | (Q2FVQ5_Q2FVQ5_STAA8) |
| 1 | <i>moaA</i>  | (P69848_MOAA_STAA8)   |
| 1 | <i>infC</i>  | (Q2FXP9_IF3_STAA8)    |

|   |                      |                       |
|---|----------------------|-----------------------|
| 1 | <i>hslO</i>          | (Q2G0Q9_HSLO_STAA8)   |
| 1 | <i>hemH</i>          | (Q2FXA4_Q2FXA4_STAA8) |
| 1 | <i>guaC</i>          | (Q2FYU4_GUAC_STAA8)   |
| 1 | <i>gmk</i>           | (Q2G1U0_KGUA_STAA8)   |
| 1 | <i>ftsY</i>          | (Q2FZ48_Q2FZ48_STAA8) |
| 1 | <i>dltC</i>          | (Q2FZW4_DLTC_STAA8)   |
| 1 | <i>dinG</i>          | (Q2FYH5_DING_STAA8)   |
| 1 | <i>cvfB</i>          | (Q2FYP3_CVFB_STAA8)   |
| 1 | <i>copA</i>          | (Q2FV64_COPA_STAA8)   |
| 1 | <i>cinA</i>          | (Q2FZ10_Q2FZ10_STAA8) |
| 1 | <i>bioA</i>          | (Q2FVJ6_BIOA_STAA8)   |
| 1 | <i>atpF</i>          | (Q2G2F8_ATPF_STAA8)   |
| 1 | <i>addA</i>          | (Q2FZT5_ADDA_STAA8)   |
| 1 | SAOUHSC_02525 (RND2) | (Q2FVZ5_Q2FVZ5_STAA8) |
| 1 | SAOUHSC_03016        | (Q2FUT5_Q2FUT5_STAA8) |
| 1 | SAOUHSC_02971        | (Q2FUX4_Q2FUX4_STAA8) |
| 1 | SAOUHSC_02956        | (Q2FUY9_Q2FUY9_STAA8) |
| 1 | SAOUHSC_02947        | (Q2FUZ8_Q2FUZ8_STAA8) |
| 1 | SAOUHSC_02791        | (Q2FVC2_Q2FVC2_STAA8) |
| 1 | SAOUHSC_02760        | (Q2FVF4_Q2FVF4_STAA8) |
| 1 | SAOUHSC_02727        | (Q2FVI3_Q2FVI3_STAA8) |
| 1 | SAOUHSC_02723        | (Q2FVI7_Q2FVI7_STAA8) |
| 1 | SAOUHSC_02690        | (Q2G1U8_Q2G1U8_STAA8) |
| 1 | SAOUHSC_02681        | (Q2FVM1_Q2FVM1_STAA8) |
| 1 | SAOUHSC_02668        | (Q2FVN4_Q2FVN4_STAA8) |
| 1 | SAOUHSC_02660        | (Q2FVP2_Q2FVP2_STAA8) |
| 1 | SAOUHSC_02649        | (Q2FVQ3_Q2FVQ3_STAA8) |
| 1 | SAOUHSC_02648        | (Q2FVQ4_Q2FVQ4_STAA8) |
| 1 | SAOUHSC_02629        | (Q2G2W1_Q2G2W1_STAA8) |

|   |               |                       |
|---|---------------|-----------------------|
| 1 | SAOUHSC_02614 | (Q2FVS7_Q2FVS7_STAA8) |
| 1 | SAOUHSC_02601 | (Q2FVU1_Q2FVU1_STAA8) |
| 1 | SAOUHSC_02583 | (Q2FVV8_Q2FVV8_STAA8) |
| 1 | SAOUHSC_02555 | (Q2FVW8_Q2FVW8_STAA8) |
| 1 | SAOUHSC_02554 | (Q2FVW9_Q2FVW9_STAA8) |
| 1 | SAOUHSC_02553 | (Q2FVX0_Q2FVX0_STAA8) |
| 1 | SAOUHSC_02544 | (Q2FVX8_Q2FVX8_STAA8) |
| 1 | SAOUHSC_02406 | (Q2FW93_Q2FW93_STAA8) |
| 1 | SAOUHSC_02381 | (Q2FWB7_Q2FWB7_STAA8) |
| 1 | SAOUHSC_02374 | (Q2FWC4_Q2FWC4_STAA8) |
| 1 | SAOUHSC_02357 | (Q2FWE2_Q2FWE2_STAA8) |
| 1 | SAOUHSC_02352 | (Q2G2F5_Q2G2F5_STAA8) |
| 1 | SAOUHSC_02197 | (Q2FWT3_Q2FWT3_STAA8) |
| 1 | SAOUHSC_02161 | (Q2FWW1_Q2FWW1_STAA8) |
| 1 | SAOUHSC_02098 | (Q2FX09_Q2FX09_STAA8) |
| 1 | SAOUHSC_01987 | (Q2FX90_Q2FX90_STAA8) |
| 1 | SAOUHSC_01979 | (Q2FX98_Q2FX98_STAA8) |
| 1 | SAOUHSC_01978 | (Q2FX99_Y1978_STAA8)  |
| 1 | SAOUHSC_01977 | (Q2FXA0_Y1977_STAA8)  |
| 1 | SAOUHSC_01969 | (Q2G2T0_Q2G2T0_STAA8) |
| 1 | SAOUHSC_01966 | (Q2G2F2_Q2G2F2_STAA8) |
| 1 | SAOUHSC_01915 | (Q2G2V2_Q2G2V2_STAA8) |
| 1 | SAOUHSC_01877 | (Q2FXH0_Q2FXH0_STAA8) |
| 1 | SAOUHSC_01869 | (Q2FXH8_Q2FXH8_STAA8) |
| 1 | SAOUHSC_01867 | (Q2FXI0_Q2FXI0_STAA8) |
| 1 | SAOUHSC_01846 | (Q2G294_Q2G294_STAA8) |
| 1 | SAOUHSC_01825 | (Q2FXL0_Q2FXL0_STAA8) |
| 1 | SAOUHSC_01812 | (Q2FXM3_Q2FXM3_STAA8) |
| 1 | SAOUHSC_01803 | (Q2FXN2_Q2FXN2_STAA8) |

|   |               |                       |
|---|---------------|-----------------------|
| 1 | SAOUHSC_01801 | (Q2FXN4_Q2FXN4_STAA8) |
| 1 | SAOUHSC_01744 | (Q2FXT9_Q2FXT9_STAA8) |
| 1 | SAOUHSC_01734 | (Q2FXU8_Q2FXU8_STAA8) |
| 1 | SAOUHSC_01732 | (Q2FXV0_Q2FXV0_STAA8) |
| 1 | SAOUHSC_01700 | (Q2FXY0_Q2FXY0_STAA8) |
| 1 | SAOUHSC_01664 | (Q2FY10_PDRP_STAA8)   |
| 1 | SAOUHSC_01659 | (Q2FY15_Q2FY15_STAA8) |
| 1 | SAOUHSC_01652 | (Q2FY21_Q2FY21_STAA8) |
| 1 | SAOUHSC_01610 | (Q2FY55_Y1610_STAA8)  |
| 1 | SAOUHSC_01587 | (Q2FY78_Q2FY78_STAA8) |
| 1 | SAOUHSC_01488 | (Q2FYG4_Q2FYG4_STAA8) |
| 1 | SAOUHSC_01487 | (Q2FYG5_Q2FYG5_STAA8) |
| 1 | SAOUHSC_01480 | (Q2FYH2_Q2FYH2_STAA8) |
| 1 | SAOUHSC_01455 | (Q2FYJ0_Q2FYJ0_STAA8) |
| 1 | SAOUHSC_01436 | (Q2FYK4_Y1436_STAA8)  |
| 1 | SAOUHSC_01284 | (Q2FYY8_Q2FYY8_STAA8) |
| 1 | SAOUHSC_01279 | (Q2FYZ3_Q2FYZ3_STAA8) |
| 1 | SAOUHSC_01267 | (Q2FZ04_Q2FZ04_STAA8) |
| 1 | SAOUHSC_01258 | (Q2FZ13_Q2FZ13_STAA8) |
| 1 | SAOUHSC_01214 | (Q2FZ39_Q2FZ39_STAA8) |
| 1 | SAOUHSC_01198 | (Q2FZ54_Q2FZ54_STAA8) |
| 1 | SAOUHSC_01179 | (Q2G266_Q2G266_STAA8) |
| 1 | SAOUHSC_01031 | (Q2FZH3_Q2FZH3_STAA8) |
| 1 | SAOUHSC_01016 | (Q2FZI7_Q2FZI7_STAA8) |
| 1 | SAOUHSC_00989 | (Q2FZL1_Q2FZL1_STAA8) |
| 1 | SAOUHSC_00982 | (Q2FZL8_Q2FZL8_STAA8) |
| 1 | SAOUHSC_00974 | (Q2FZM6_Q2FZM6_STAA8) |
| 1 | SAOUHSC_00951 | (Q2FZP9_Y951_STAA8)   |
| 1 | SAOUHSC_00946 | (Q2FZQ4_Q2FZQ4_STAA8) |

|   |               |                       |
|---|---------------|-----------------------|
| 1 | SAOUHSC_00925 | (Q2FZR5_Q2FZR5_STAA8) |
| 1 | SAOUHSC_00909 | (Q2FZT1_Q2FZT1_STAA8) |
| 1 | SAOUHSC_00897 | (Q2FZU3_Q2FZU3_STAA8) |
| 1 | SAOUHSC_00873 | (Q2FZW2_Q2FZW2_STAA8) |
| 1 | SAOUHSC_00855 | (Q2FZX9_2NPD_STAA8)   |
| 1 | SAOUHSC_00847 | (Q2FZY7_Q2FZY7_STAA8) |
| 1 | SAOUHSC_00792 | (Q2G035_Y792_STAA8)   |
| 1 | SAOUHSC_00730 | (Q2G090_Q2G090_STAA8) |
| 1 | SAOUHSC_00727 | (Q2G094_Q2G094_STAA8) |
| 1 | SAOUHSC_00711 | (Q2G2T9_Q2G2T9_STAA8) |
| 1 | SAOUHSC_00707 | (Q2G238_Q2G238_STAA8) |
| 1 | SAOUHSC_00640 | (Q2G2L3_Q2G2L3_STAA8) |
| 1 | SAOUHSC_00639 | (Q2G2K9_Q2G2K9_STAA8) |
| 1 | SAOUHSC_00547 | (Q2G0L3_Q2G0L3_STAA8) |
| 1 | SAOUHSC_00483 | (Q2G0R3_Q2G0R3_STAA8) |
| 1 | SAOUHSC_00444 | (Q2G0T4_Y444_STAA8)   |
| 1 | SAOUHSC_00413 | (Q2G0W1_Y413_STAA8)   |
| 1 | SAOUHSC_00398 | (Q2G0X5_Q2G0X5_STAA8) |
| 1 | SAOUHSC_00333 | (Q2G1V4_Q2G1V4_STAA8) |
| 1 | SAOUHSC_00307 | (Q2G148_Q2G148_STAA8) |
| 1 | SAOUHSC_00269 | (Q2G178_Q2G178_STAA8) |
| 1 | SAOUHSC_00268 | (Q2G179_Q2G179_STAA8) |
| 1 | SAOUHSC_00261 | (Q2G185_Q2G185_STAA8) |
| 1 | SAOUHSC_00236 | (Q2G1A9_Q2G1A9_STAA8) |
| 1 | SAOUHSC_00196 | (Q2G1C9_Q2G1C9_STAA8) |
| 1 | SAOUHSC_00126 | (Q2G1J6_Q2G1J6_STAA8) |
| 1 | SAOUHSC_00039 | (Q2G1R3_Q2G1R3_STAA8) |

**Table S2. Strains and plasmids used in this study**

| Strain or plasmid                          | Description                                                       | Reference or source              |
|--------------------------------------------|-------------------------------------------------------------------|----------------------------------|
| <i>E. coli</i> DC10B                       | Cloning strain                                                    | (Monk et al., 2012)              |
| <i>E. coli</i> DH5 $\alpha$                | Cloning strain                                                    | (Hanahan, 1983)                  |
| <i>S. aureus</i> RN4220                    | <i>S. aureus</i> laboratory strain                                | (Kreiswirth et al., 1983)        |
| <i>S. aureus</i> SEJ1                      | $\Delta spa$ in RN4220                                            | (Gründling and Schneewind, 2007) |
| <i>S. aureus</i> WY110                     | $\Delta spa \Delta sbi, sbi::ermB$ in <i>S. aureus</i> SEJ1       | This work                        |
| <i>S. aureus</i> WY223                     | $P_{spac}$ - <i>secA</i> in <i>S. aureus</i> RN4220               | This work                        |
| <i>S. aureus</i> WY230                     | $P_{tet}$ - <i>secA:sfGFP</i> in <i>S. aureus</i> WY223           | This work                        |
| <i>S. aureus</i> ANG499                    | $P_{spac}$ - <i>ItaS</i> in <i>S. aureus</i> RN4220               | (Gründling and Schneewind, 2007) |
| <i>S. aureus</i> WY418                     | $\Delta secDF$ in <i>S. aureus</i> RN4220                         | This work                        |
| <i>S. aureus</i> WY416                     | $\Delta rnd2$ in <i>S. aureus</i> RN4220                          | This work                        |
| <i>S. aureus</i> WY400                     | $\Delta rnd3$ in <i>S. aureus</i> RN4220                          | This work                        |
| <i>S. aureus</i> WY412                     | $\Delta secDF \Delta rnd2 \Delta rnd3$ in <i>S. aureus</i> RN4220 | This work                        |
| pOS1                                       | <i>E. coli/S. aureus</i> shuttle vector                           | (Schneewind et al., 1993)        |
| pSpA <sub>ED</sub>                         | <i>spa</i> promoter, signal peptide and IgBDs E and D in pOS1     | This work                        |
| pSpA <sub>ED/R10A</sub>                    | R10A variant of pSpA <sub>ED</sub>                                | This work                        |
| pSpA <sub>ED/S18L</sub>                    | S18L variant of of pSpA <sub>ED</sub>                             | This work                        |
| pSpA <sub>ED/<math>\Delta</math>IA</sub>   | $\Delta$ IA variant of pSpA <sub>ED</sub>                         | This work                        |
| pCL55                                      | <i>S. aureus</i> integration vector                               | (Lee et al., 1991)               |
| pCL55-SpA                                  | Full length <i>spa</i> with its native promoter cloned in pCL55   | This work                        |
| pCL55-SpA <sub>R10A</sub>                  | R10A variant of pCL55-SpA                                         | This work                        |
| pCL55-SpA <sub>S18L</sub>                  | S18L variant of pCL55-SpA                                         | This work                        |
| pCL55-SpA <sub><math>\Delta</math>IA</sub> | $\Delta$ IA variant of pCL55-SpA                                  | This work                        |
| pCL55-SpA <sub>SP-SasF</sub>               | SpA signal peptide replaced by SasF signal peptide in pCL55-SpA   | This work                        |
| pCL55-P <sub>tet</sub>                     | pCL55 with anhydro-tetracycline inducible                         | (Gründling and                   |

|                                               |                                                          |                                  |
|-----------------------------------------------|----------------------------------------------------------|----------------------------------|
|                                               | promoter                                                 | Schneewind, 2007)                |
| pCL55-P <sub>tet</sub> -<br><i>secA:sfGFP</i> | SecA-sfGFP hybrid cloned into pCL55-P <sub>tet</sub>     | This work                        |
| pMutin-HA                                     | Single copy integration vector                           | Bacillus Genetic Stock<br>Center |
| pMutin-HA-5' <i>secA</i>                      | <i>secA</i> promoter and 656 bp in pMutin-HA             | This work                        |
| pKOR1- <i>secDF</i>                           | allelic replacement vector for <i>secDF1</i><br>deletion | This work                        |
| pKOR1- <i>rnd2</i>                            | allelic replacement vector for <i>secDF2</i><br>deletion | This work                        |
| pSecDF                                        | <i>secDF</i> ORF and 274 bp upstream in pOS1             | This work                        |

---

1013

1014



1015

**Table S3. Oligonucleotide primers used in this study**

| Primer | <sup>a</sup> Direction | Sequence                                       | Plasmid                      |
|--------|------------------------|------------------------------------------------|------------------------------|
| 10     | F                      | GCGTAGTATTGCAATACATAATTCGTTA                   | pSpA <sub>ED</sub>           |
| 69     | R                      | TTTTGGATCCTTACATTTTCGGTGCTTGAGATTCGTT          | pSpA <sub>ED</sub>           |
| 38     | R                      | TGCAATACCTACACCTAGAATGTTTTCTTTTTCA             | pSpA <sub>ED/ΔYSIRK</sub>    |
| 39     | F                      | GAAAAAGAAAAACATTCTAGGTGTAGGTATTGCATC           | pSpA <sub>ED/ΔYSIRK</sub>    |
| 49     | R                      | TGTACCTAAAGTTACTACACCTAGTTTACGA                | pSpA <sub>ED/ΔGIAS</sub>     |
| 50     | F                      | TCGTAAACTAGGTGTAGTAACTTTAGGTACA                | pSpA <sub>ED/ΔGIAS</sub>     |
| 51     | R                      | TGTACCTAAAGTTACTGCAATTACACCTAGT                | pSpA <sub>ED/ΔG15ΔS18</sub>  |
| 52     | F                      | ACTAGGTGTAATTGCAGTAACTTTAGGTACA                | pSpA <sub>ED/ΔG15ΔS18</sub>  |
| 53     | R                      | ACCTAAAGTTACGAACTACACCTAGTTTAC                 | pSpA <sub>ED/ΔIA</sub>       |
| 54     | F                      | GTAAACTAGGTGTAGGTTCTGTAACCTTAGGT               | pSpA <sub>ED/ΔIA</sub>       |
| 55     | R                      | AGTTACAGATGCAATTAATACACCTAGTTTACGA             | pSpA <sub>ED/G15L</sub>      |
| 56     | F                      | TCGTAAACTAGGTGTATTAATTGCATCTGTAACCT            | pSpA <sub>ED/G15L</sub>      |
| 57     | R                      | TGTACCTAAAGTTACTAATGCAATACCTACACCT             | pSpA <sub>ED/S18L</sub>      |
| 58     | F                      | AGGTGTAGGTATTGCATTAGTAACTTTAGGTACA             | pSpA <sub>ED/S18L</sub>      |
| 70     | R                      | AGTAATGTACCTAAAGTTACCAATGCAATTAATACACCTAGT     | pSpA <sub>ED/G15L/S18L</sub> |
| 71     | F                      | ACTAGGTGTATTAATTGCATTGGTAACTTTAGGTACATTACT     | pSpA <sub>ED/G15L/S18L</sub> |
| 72     | R                      | AGTAATGTACCTAAAGTTACAGATGCAATTACACCTAGTTTACGA  | pSpA <sub>ED/ΔG15</sub>      |
| 73     | F                      | TCGTAAACTAGGTGTAATTGCATCTGTAACCTTTAGGTACATTACT | pSpA <sub>ED/ΔG15</sub>      |
| 74     | R                      | ACCTAAAGTTACTGCAATACCTACACCTAGTTTACGAATTGA     | pSpA <sub>ED/ΔS18</sub>      |
| 75     | F                      | TCAATTCGTAACCTAGGTGTAGGTATTGCAGTAACTTTAGGT     | pSpA <sub>ED/ΔS18</sub>      |
| 84     | R                      | ATACCTACACCTAGTTTAGCAATTGAATAAATGTTT           | pSpA <sub>ED/R10A</sub>      |
| 85     | F                      | AAACATTTATTCAATTGCTAAACTAGGTGTAGGTAT           | pSpA <sub>ED/R10A</sub>      |
| 92     | R                      | TAGTTTACGAATTGAAGCAATGTTTTCTTTTTCA             | pSpA <sub>ED/Y7A</sub>       |
| 93     | F                      | TGAAAAAGAAAAACATTGCTTCAATTCGTAAACTA            | pSpA <sub>ED/Y7A</sub>       |
| 94     | R                      | TACACCTAGTTTACGAGATGAATAAATGTTTTCT             | pSpA <sub>ED/I9S</sub>       |
| 95     | F                      | AGAAAAACATTTATTCATCTCGTAAACTAGGTGTA            | pSpA <sub>ED/I9S</sub>       |
| 96     | R                      | TGCAATACCTACACCTAGAGCACGAATTGAATAAATGT         | pSpA <sub>ED/K11A</sub>      |
| 97     | F                      | ACATTTATTCAATTCGTGCTCTAGGTGTAGGTATTGCA         | pSpA <sub>ED/K11A</sub>      |
| 175    | F                      | GCGGGATCCTAGTATTGCAATACATAATTCGTTA             | pCL55-SpA                    |
| 177    | R                      | GCGGGTACCTTATAGTTCGCGACGACGTCCAGCT             | pCL55-SpA                    |
| 21     | R                      | ATTAATACCCCTGTATGTATTTGT                       | pCL55-SpA <sub>SP-SasF</sub> |
| 22     | F                      | TACAGGGGGTATTAATATGGCTAAATATCGAGGGAAAC         | pCL55-SpA <sub>SP-SasF</sub> |

|     |   |                                                        |                                            |
|-----|---|--------------------------------------------------------|--------------------------------------------|
| 23  | R | TGTTGAGCTTCATCGTGTTCGCGCAGCTTGGGCATCGTACGGCAAGA        | pCL55-SpA <sub>Sp-SasF</sub>               |
| 24  | F | GCGCAACACGATGAAGCTCAACAA                               | pCL55-SpA <sub>Sp-SasF</sub>               |
| 189 | F | CCCAAGCTTTAGCTAAAGGAGCGAACGAAATGGGA                    | pMUTIN-HA-5' <i>secA</i>                   |
| 190 | R | GCGGGTACCTGAGTCAACCTCATCAATGATTGCA                     | pMUTIN-HA-5' <i>secA</i>                   |
| 180 | F | CTCCCTAGGTAAAGGAGCGAACGAAATGGGAT                       | pCL55-P <sub>tet</sub> - <i>secA:sfGFP</i> |
| 181 | R | TGCAGCTCCTGCGGCGCCTCCTTTTCCATGGCAATTTTTGA              | pCL55-P <sub>tet</sub> - <i>secA:sfGFP</i> |
| 182 | F | AGGAGGCGCCGAGGAGCTGCATCAAAAGGTGAAGAATT                 | pCL55-P <sub>tet</sub> - <i>secA:sfGFP</i> |
| 183 | R | CTCAGATCTTTATTTATATAATTCATCCATACCA                     | pCL55-P <sub>tet</sub> - <i>secA:sfGFP</i> |
| 295 | F | GGGGACAAGTTTGTACAAAAAAGCAGGCTAATATTGTCATTGTATCCCGCTTCT | pKOR1- <i>secDF</i>                        |
| 313 | R | ACATACGTAAATATCGAACGATGAAAAGATTTTAGT                   | pKOR1- <i>secDF</i>                        |
| 314 | F | TCATCGTTCGATATTTACGTATGTATTTAGAATACT                   | pKOR1- <i>secDF</i>                        |
| 298 | R | GGGGACCACTTTGTACAAGAAAGCTGGGTTGAACATACAGAGCAGTTTATGCCT | pKOR1- <i>secDF</i>                        |
| 305 | F | GGGGACAAGTTTGTACAAAAAAGCAGGCTACATACTCCACAGATATTTTAGA   | pKOR1- <i>rnd2</i>                         |
| 306 | R | TGAATATAGATAATATAAAAGCCATAAAAGCGGT                     | pKOR1- <i>rnd2</i>                         |
| 307 | F | TGGCTTTTATATTATCTATATTCAAAAATATTTTACT                  | pKOR1- <i>rnd2</i>                         |
| 308 | R | GGGGACCACTTTGTACAAGAAAGCTGGGTTTCGATCTGATGTTGAAGTTGAT   | pKOR1- <i>rnd2</i>                         |
| 315 | F | GCGGAATTCTGAGAAGTGGTATTA AAAAGGATGA                    | pSecDF                                     |
| 316 | R | GCGGGATCCTTAACTAAAATCTTTTCATCGTTCGA                    | pSecDF                                     |

---

<sup>a</sup>PCR primer direction for forward (F) or reverse (R) amplification of template DNA.

---

1016

1017

1018

1019

1020

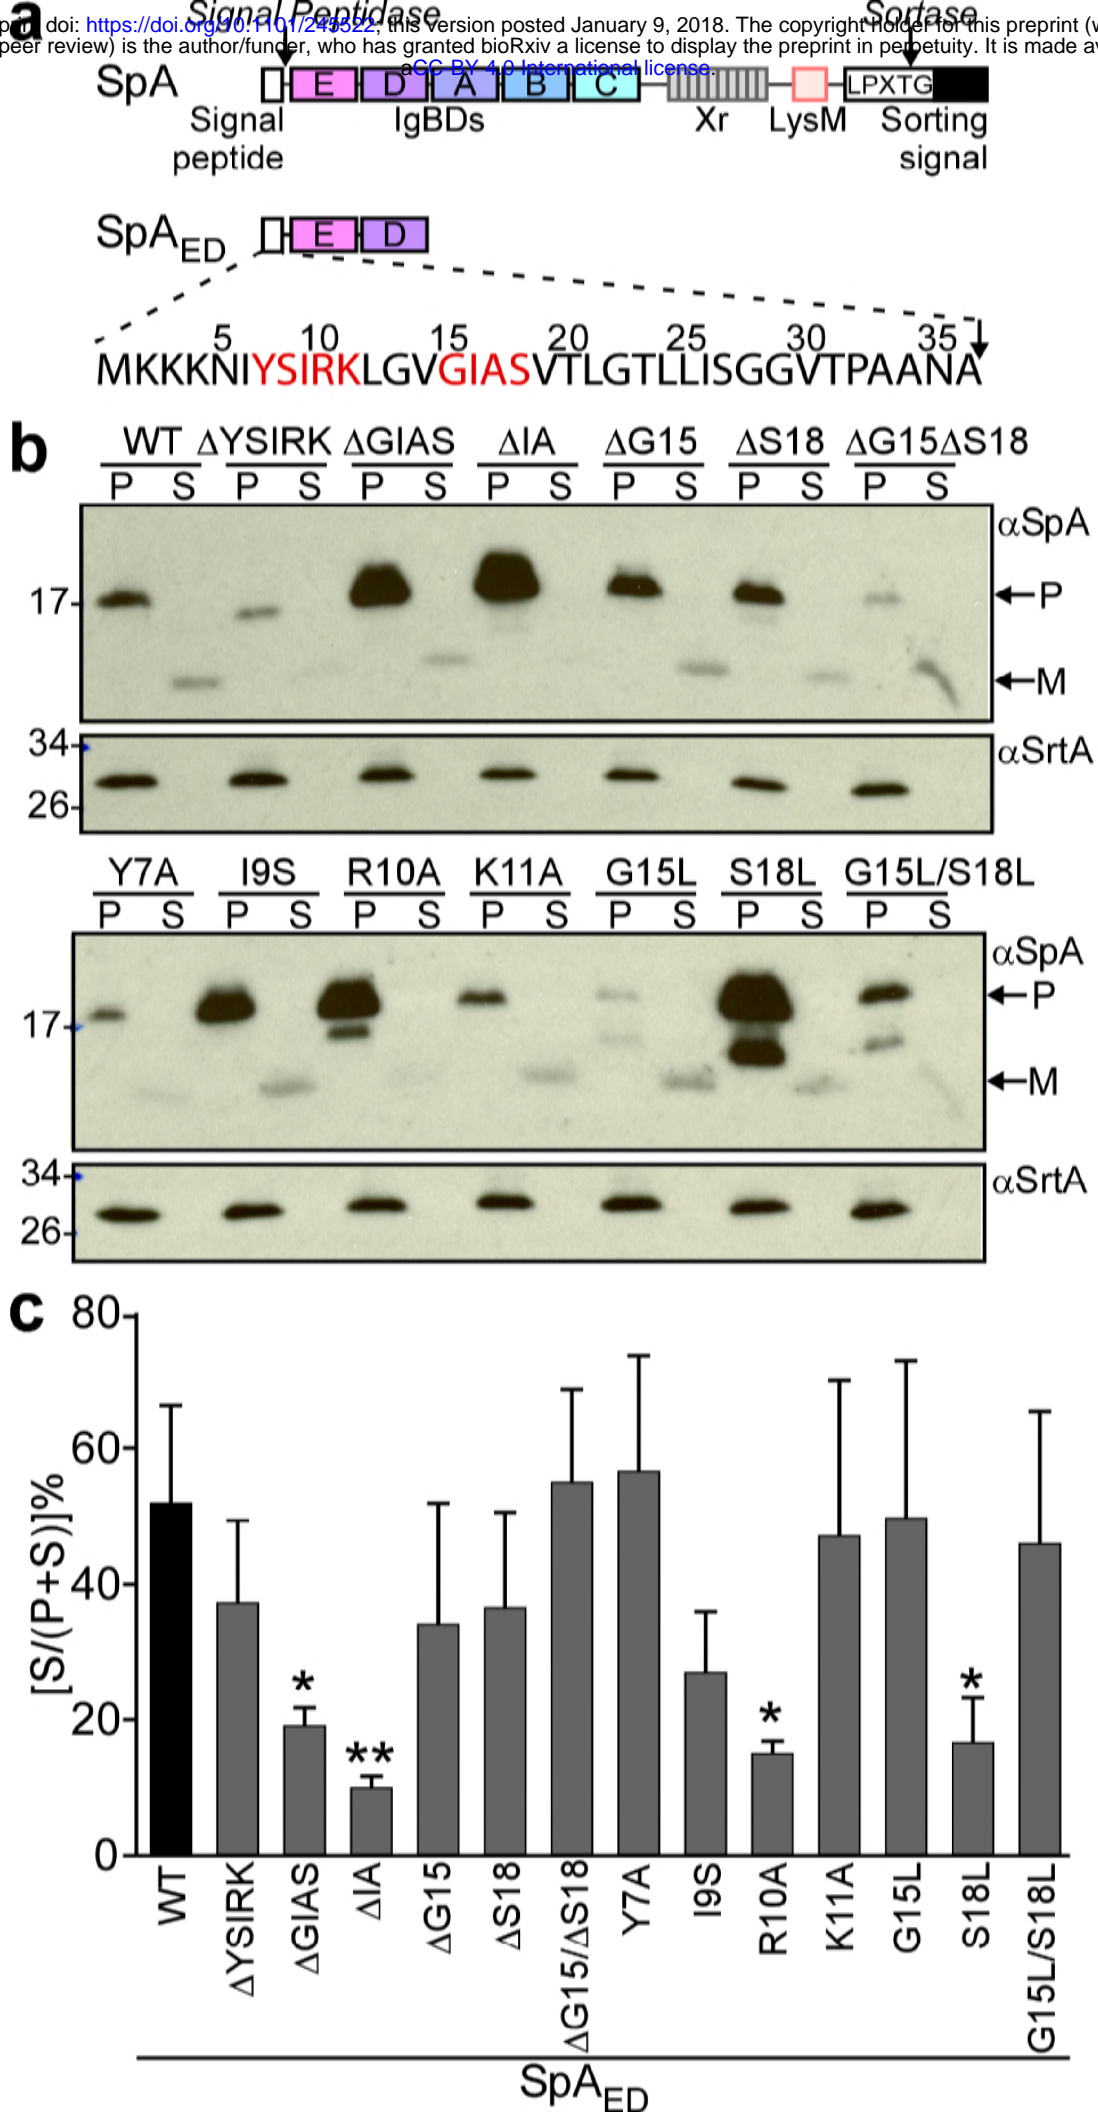

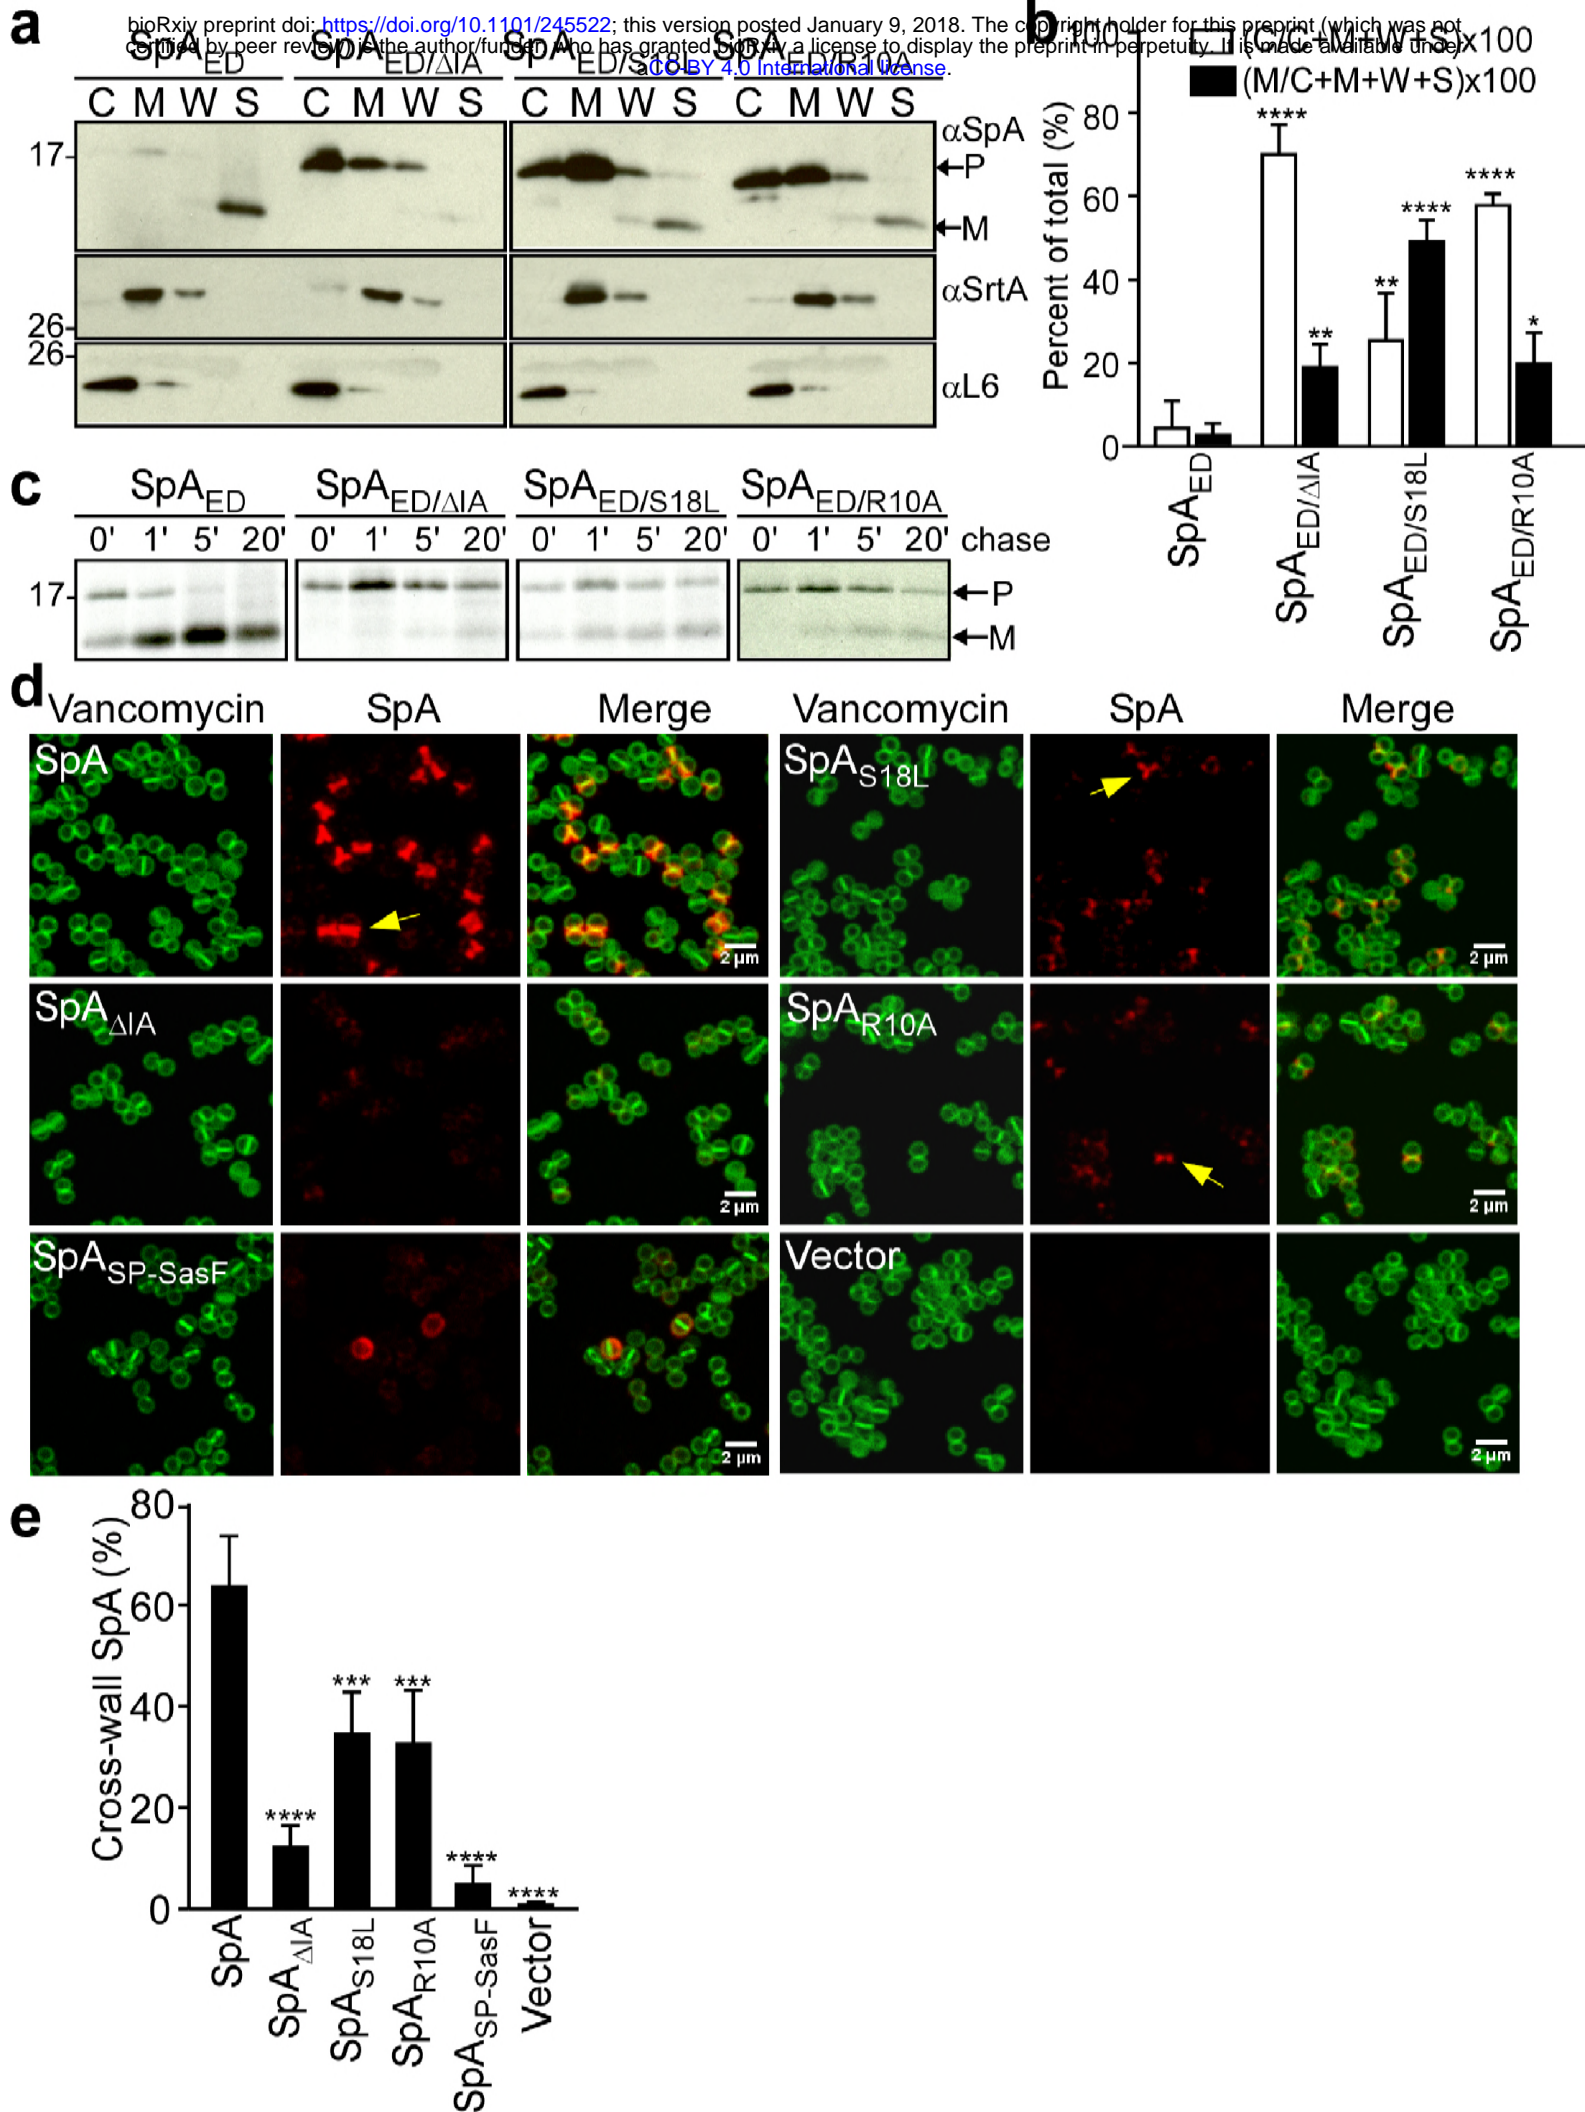



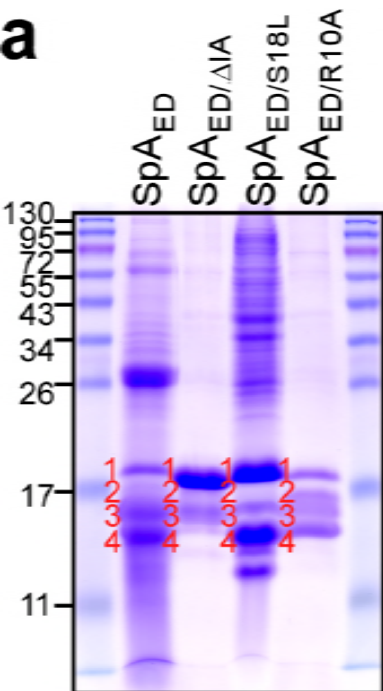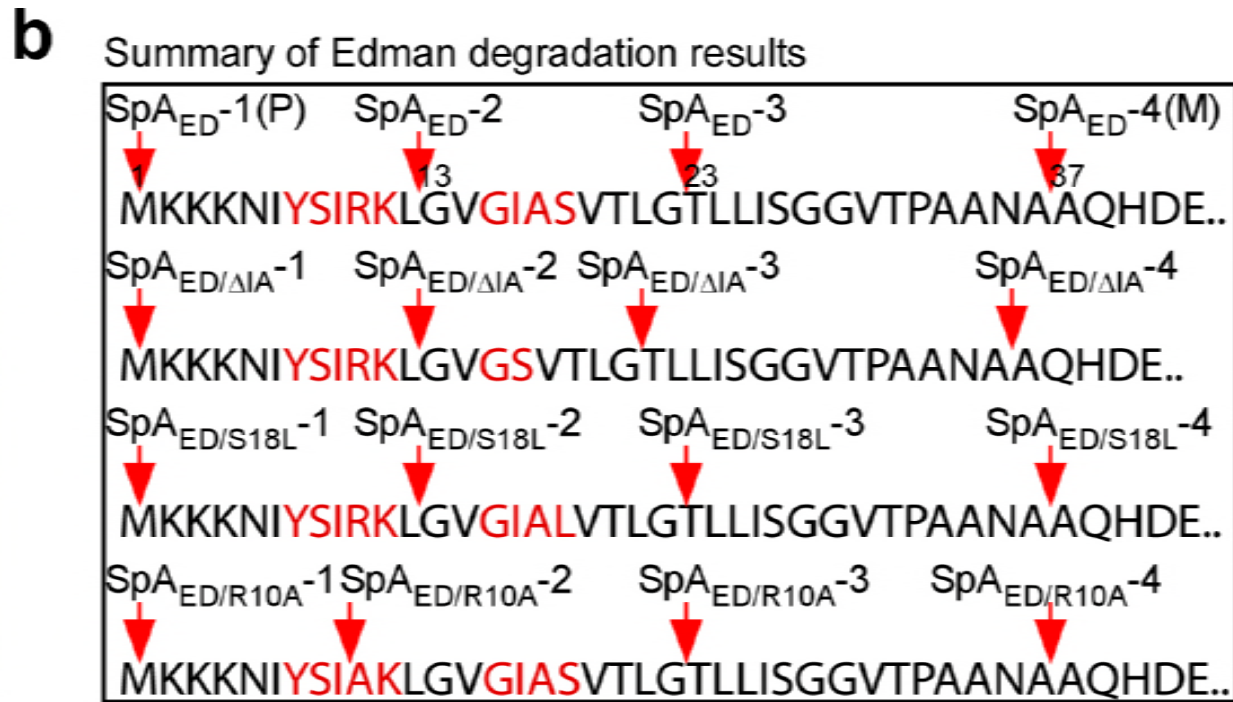

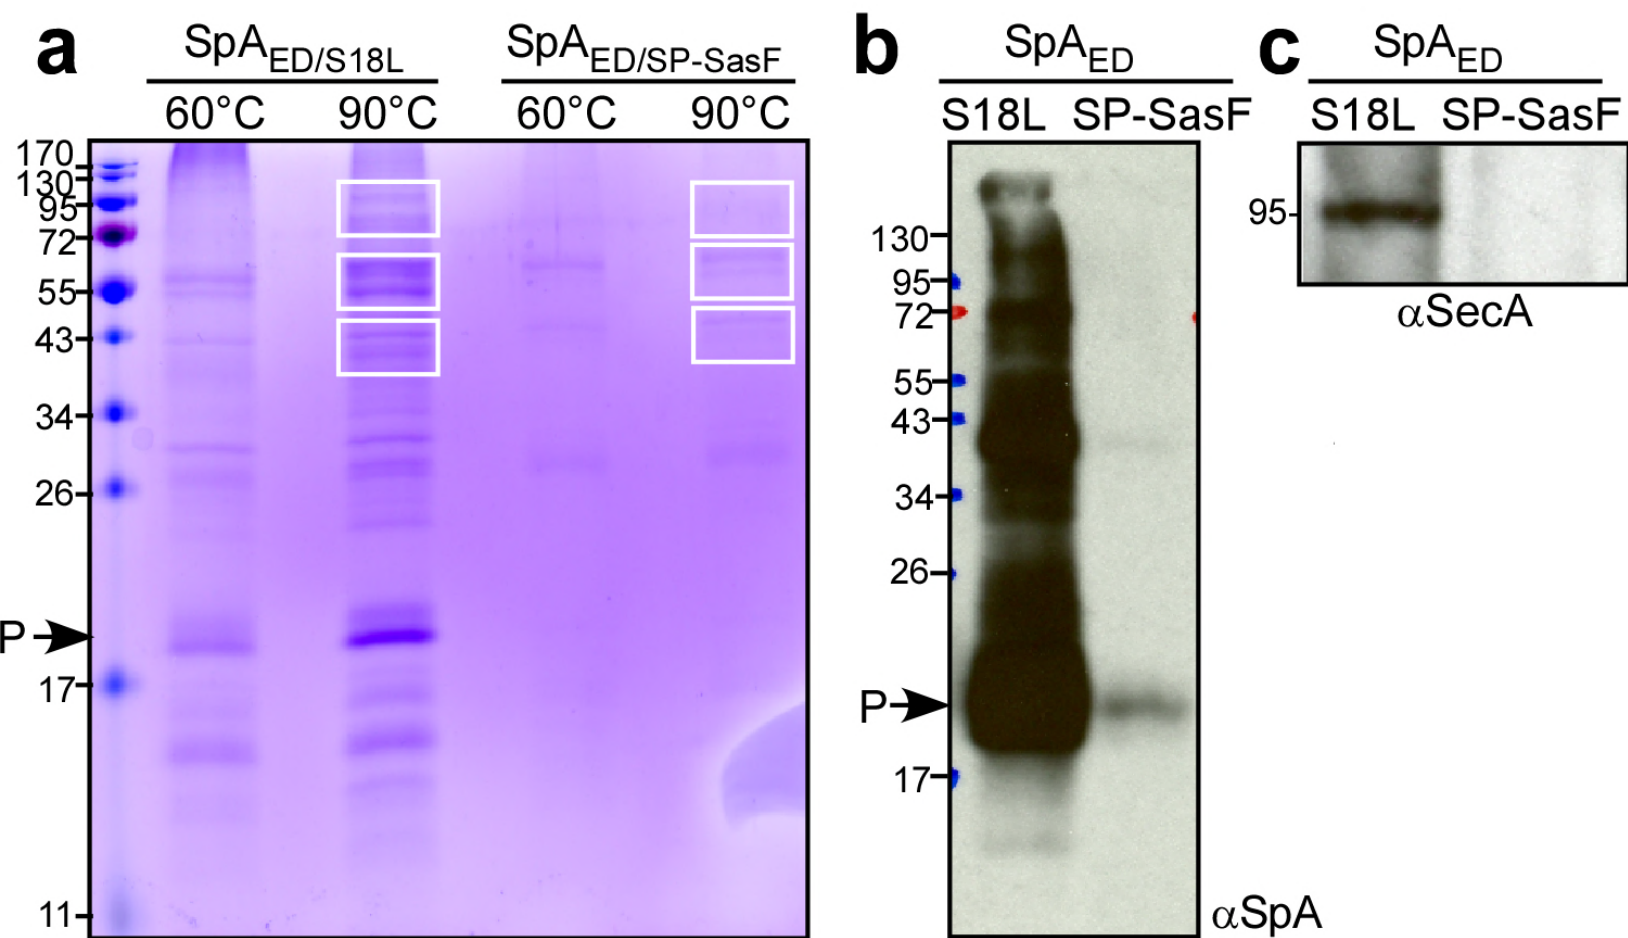

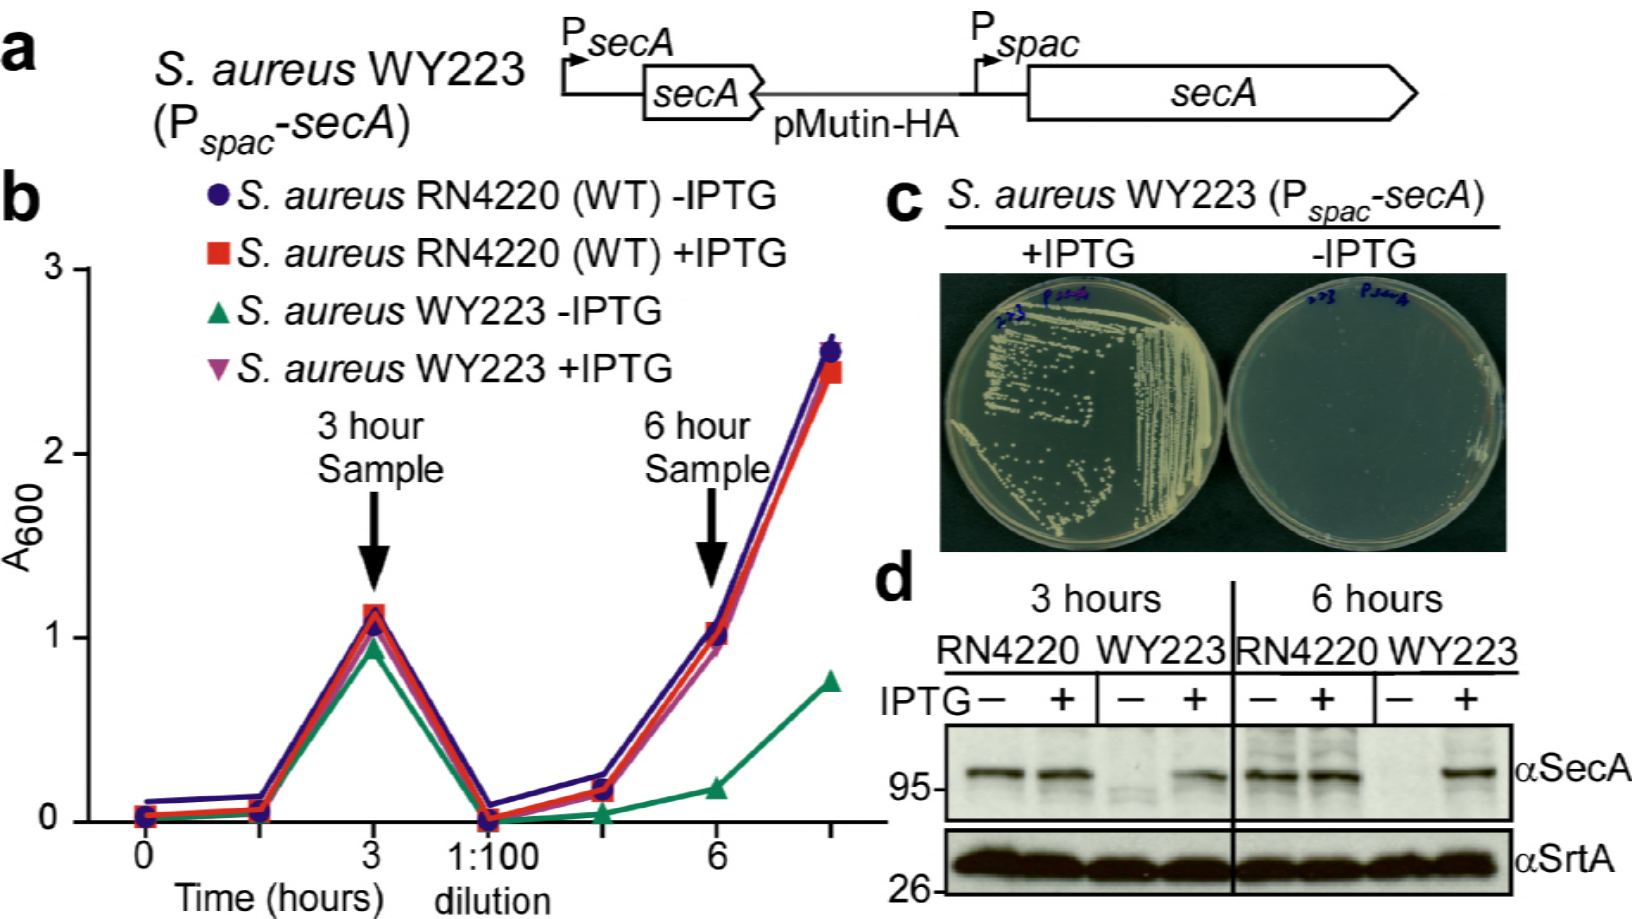

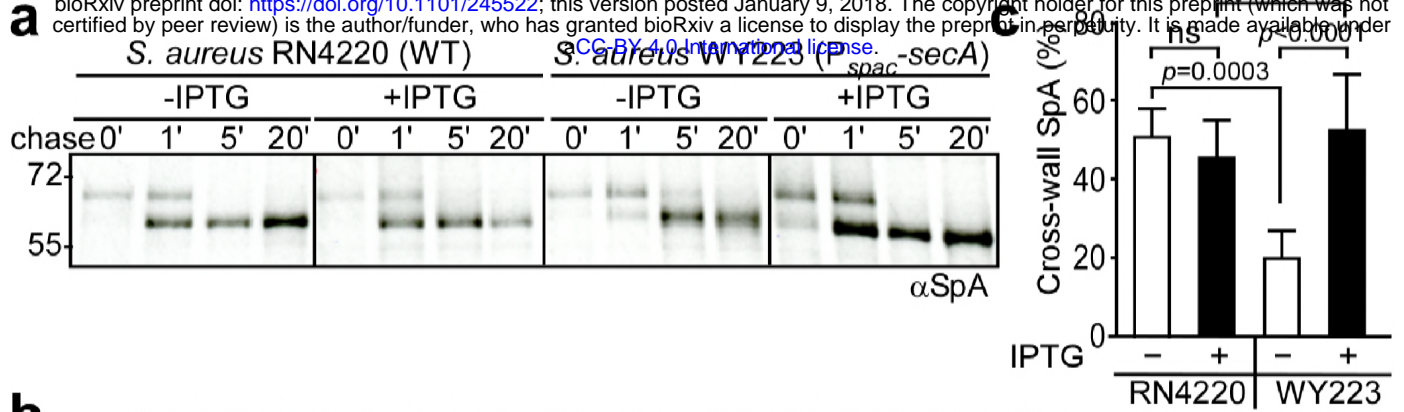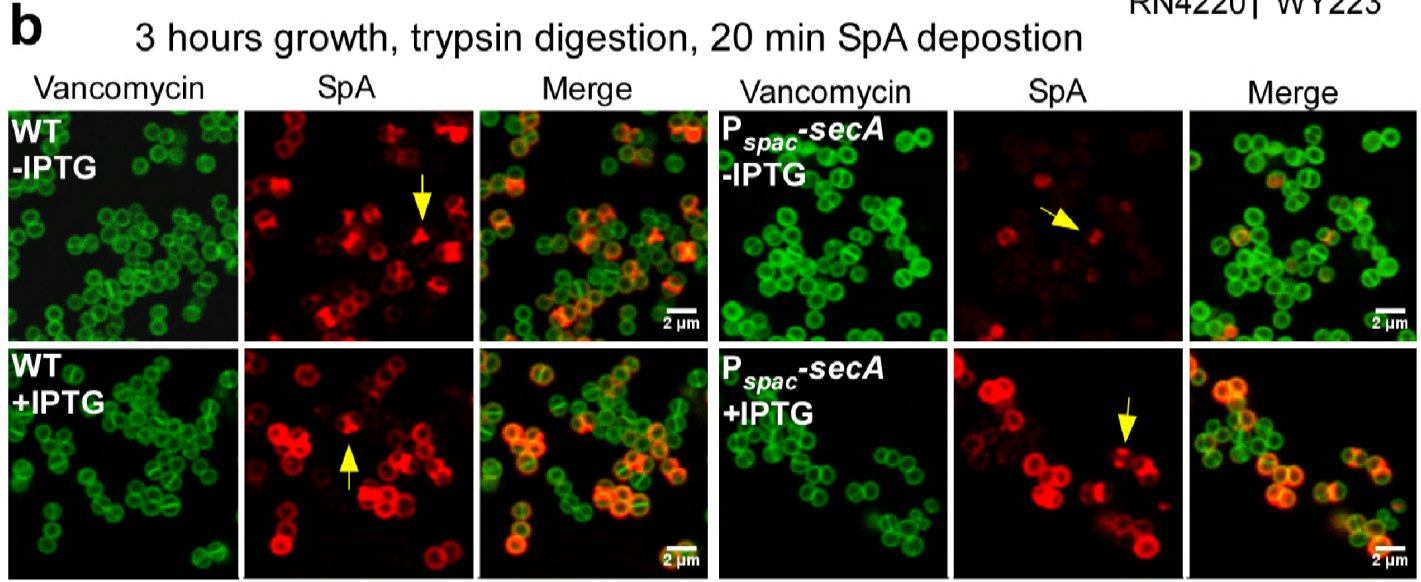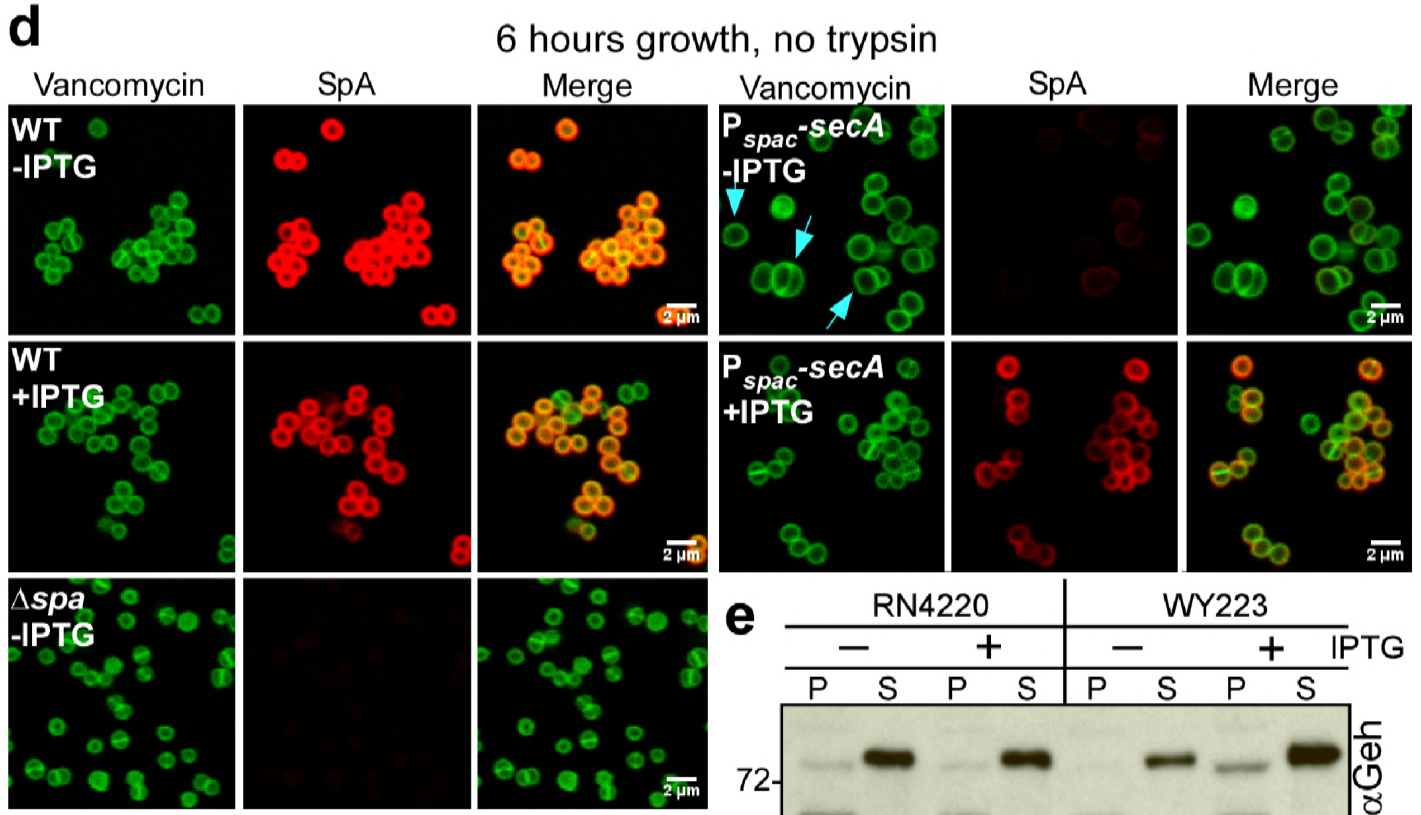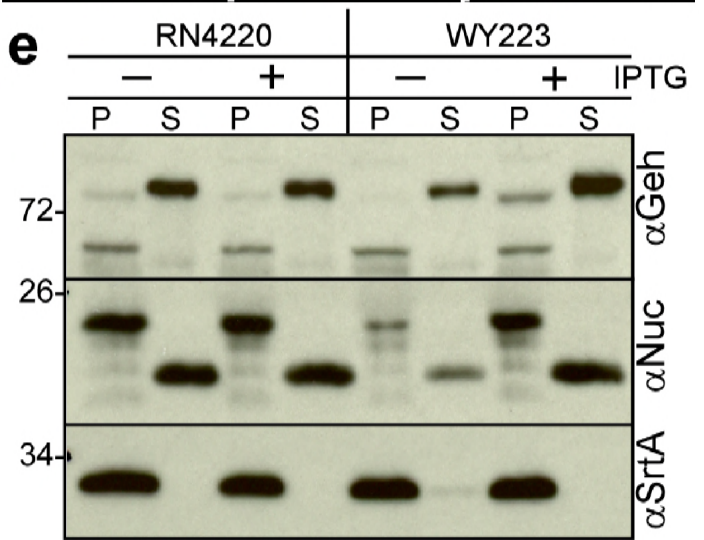



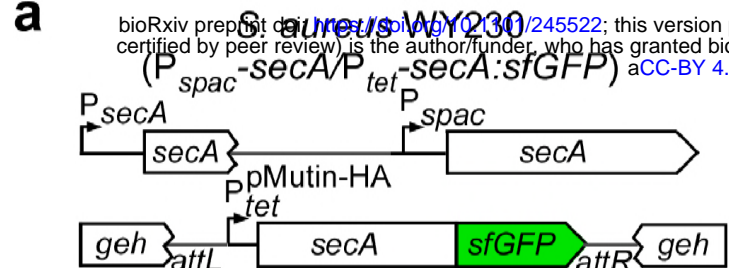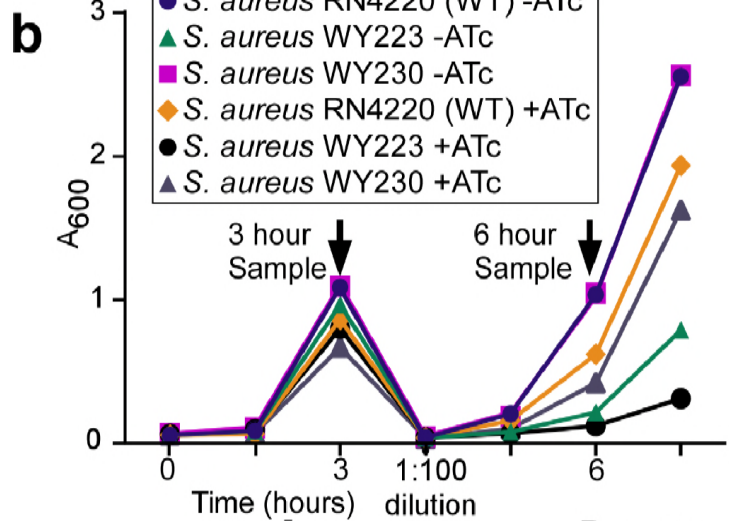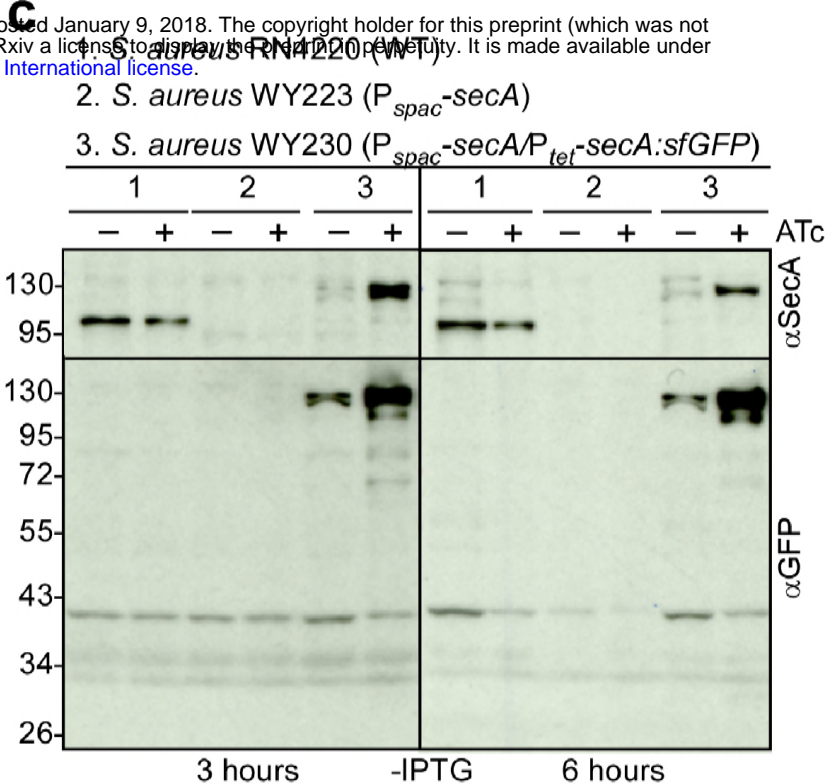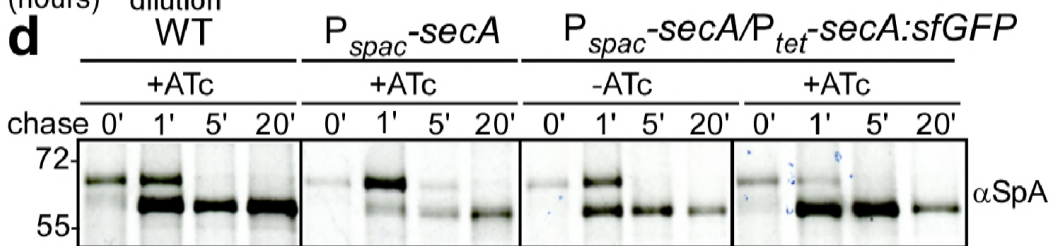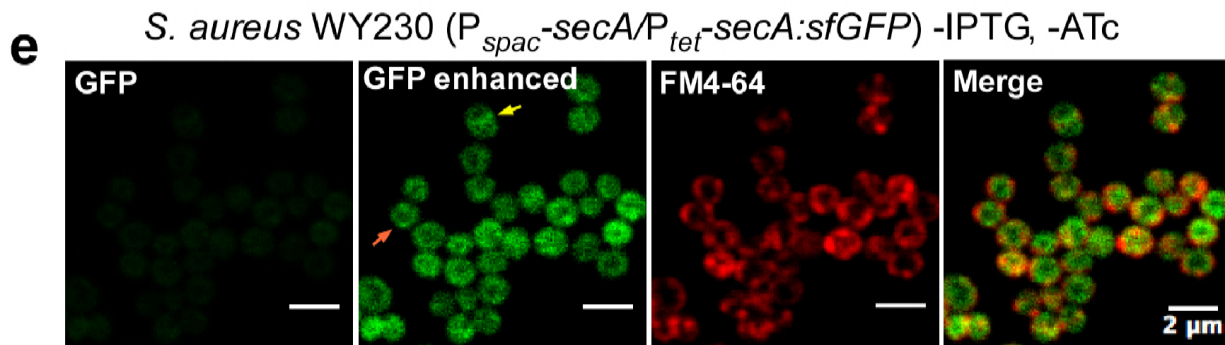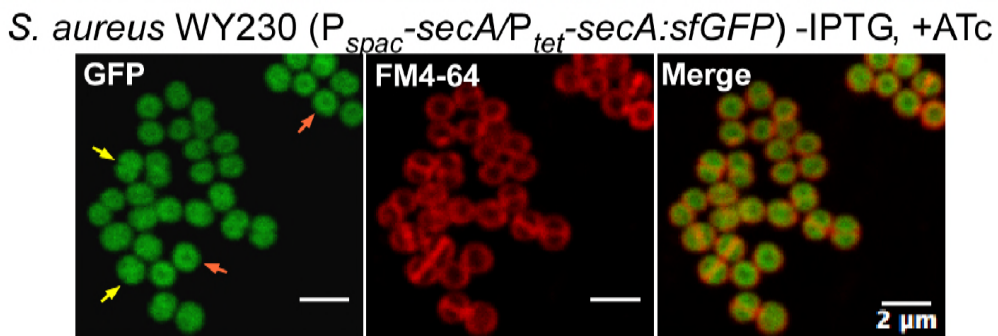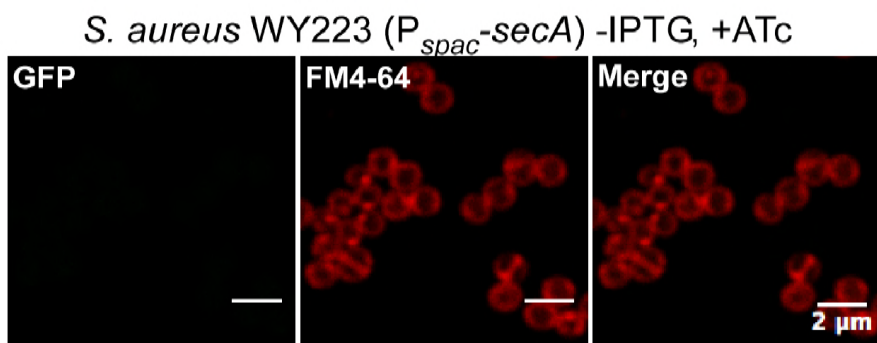

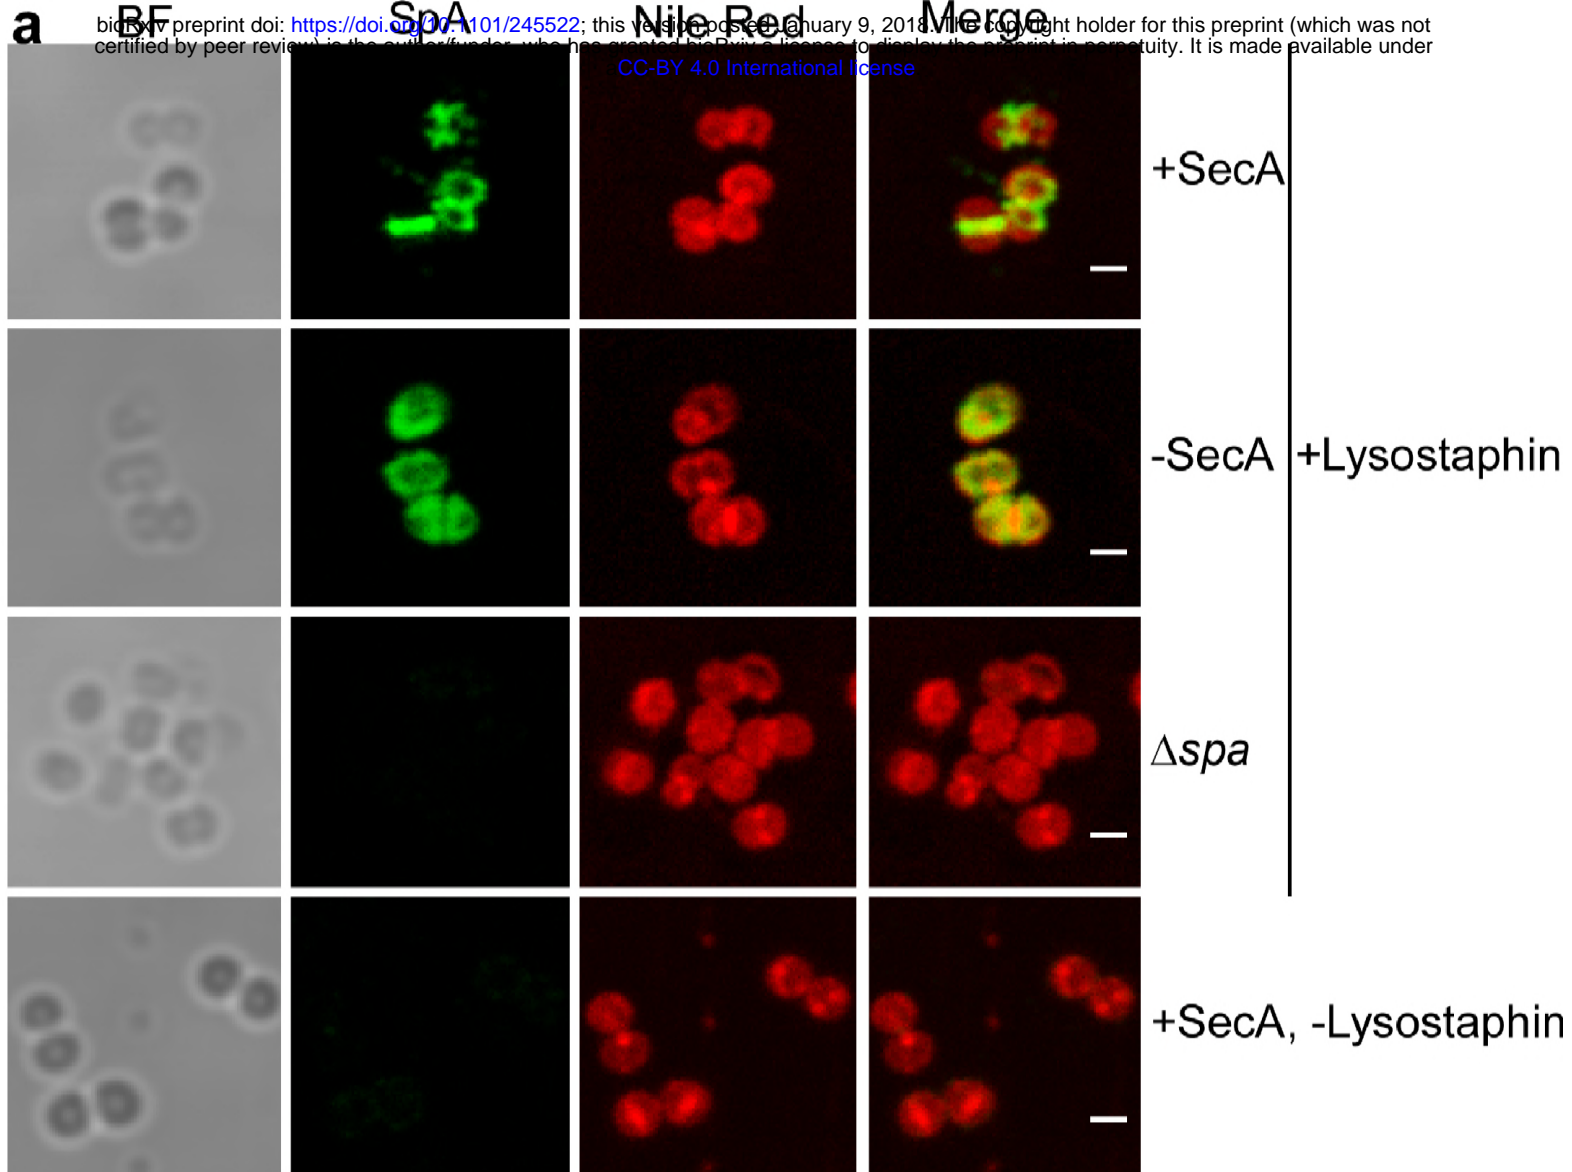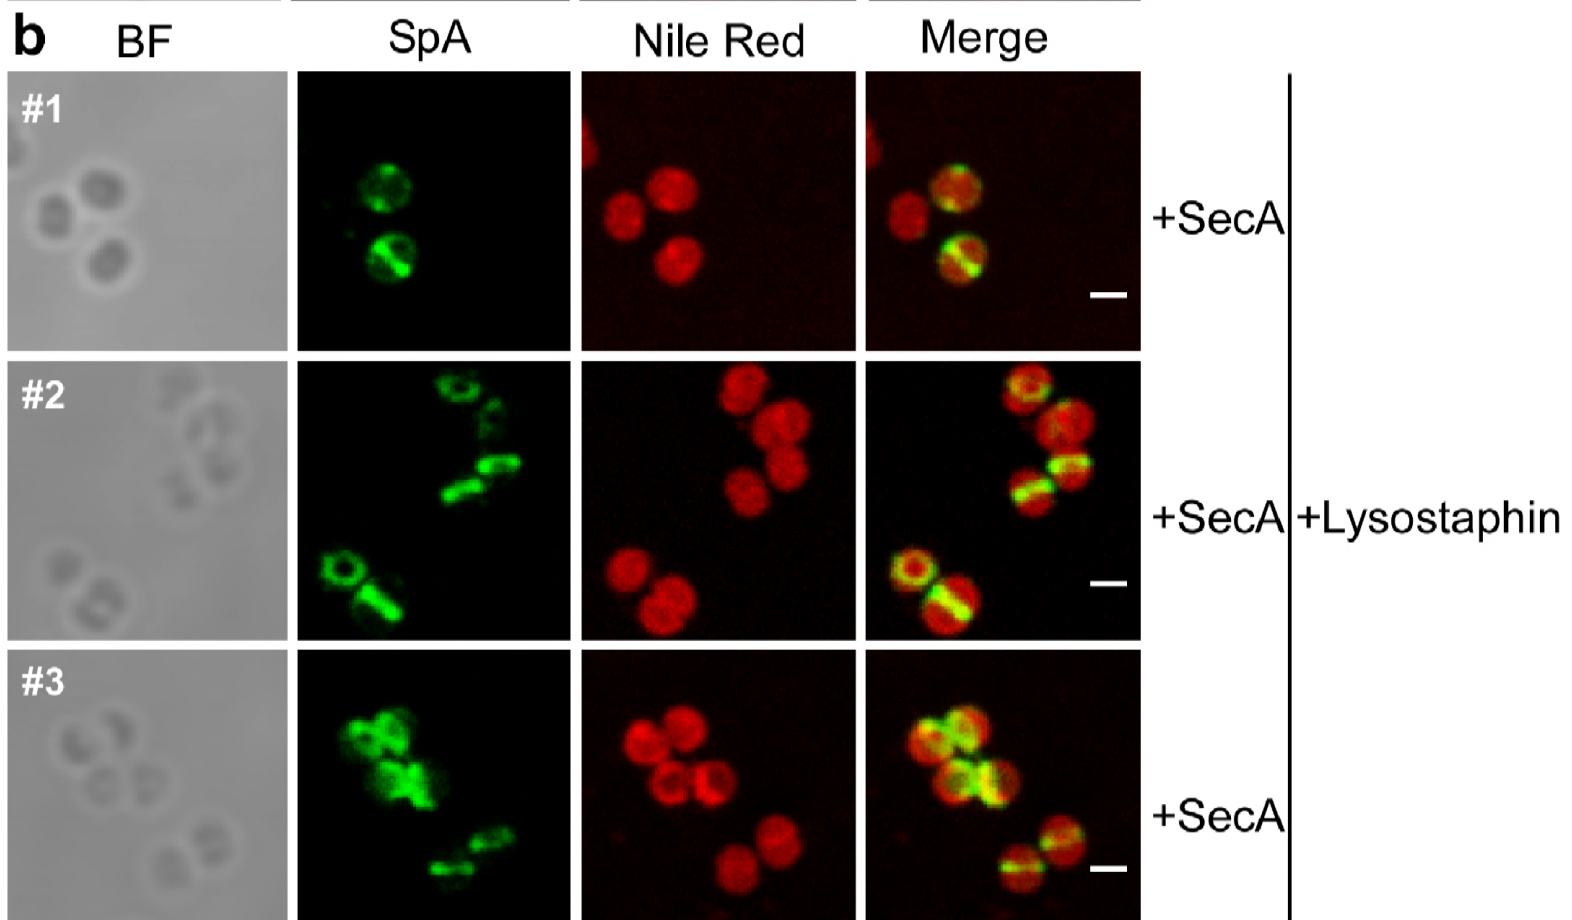

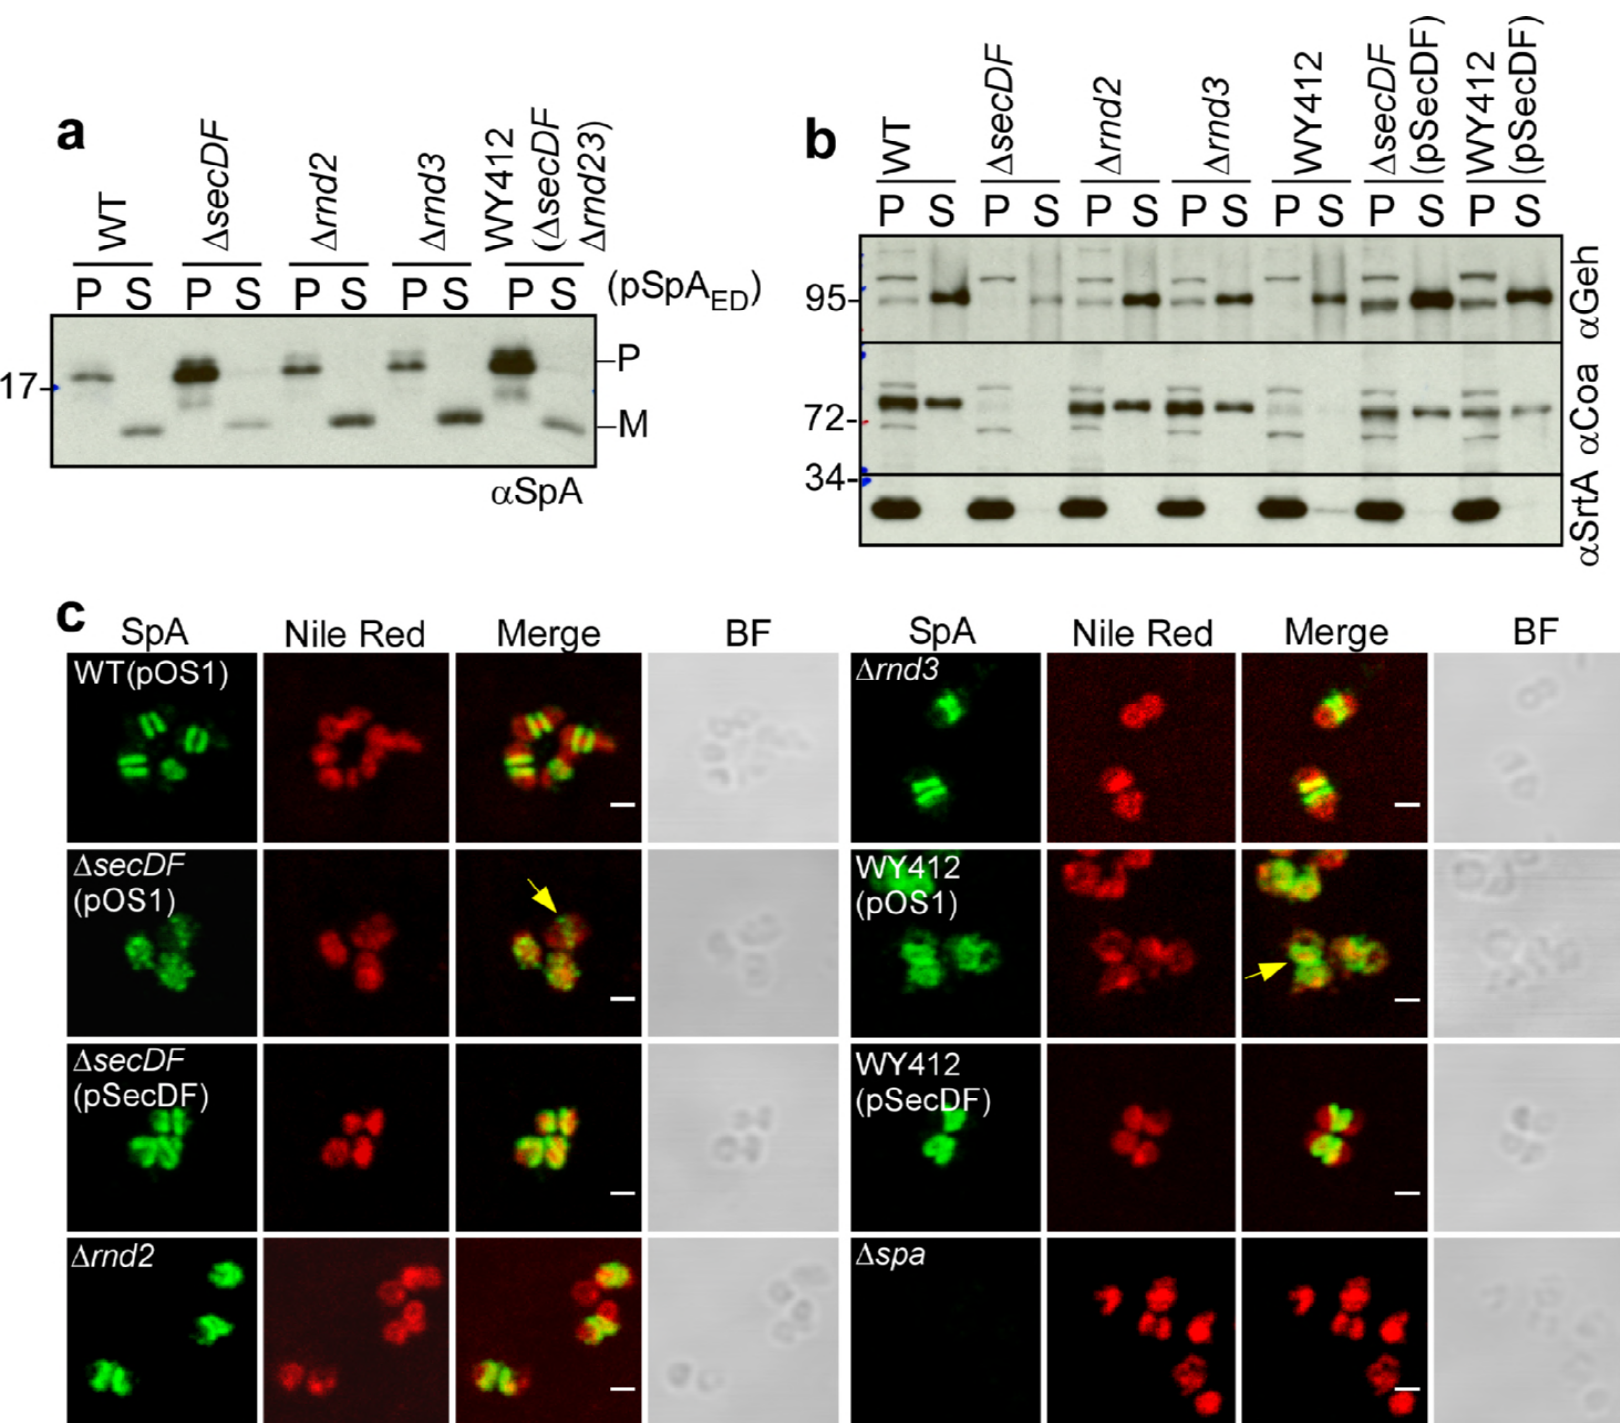



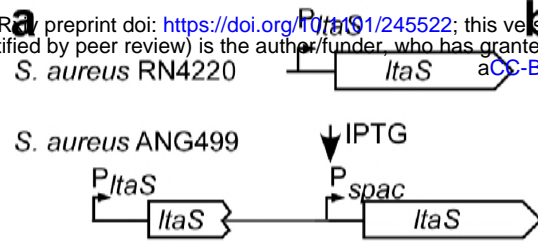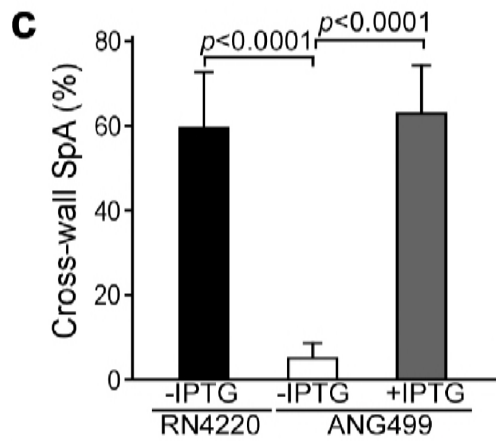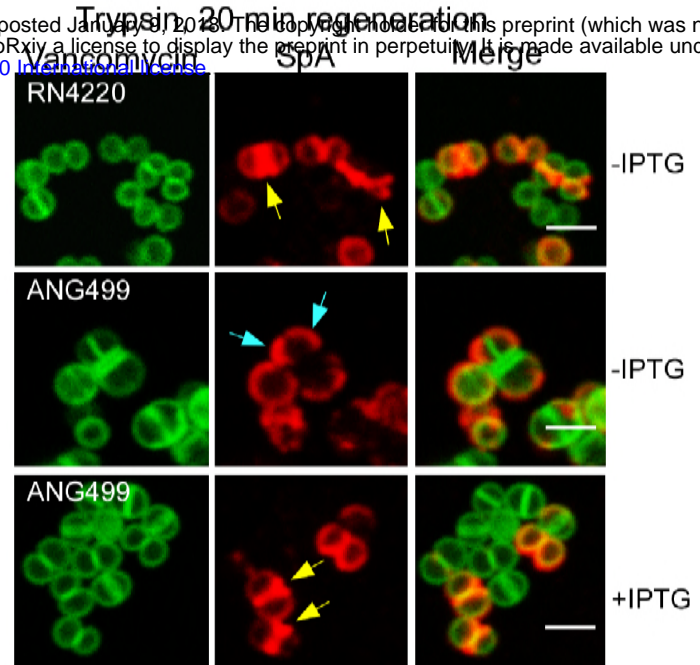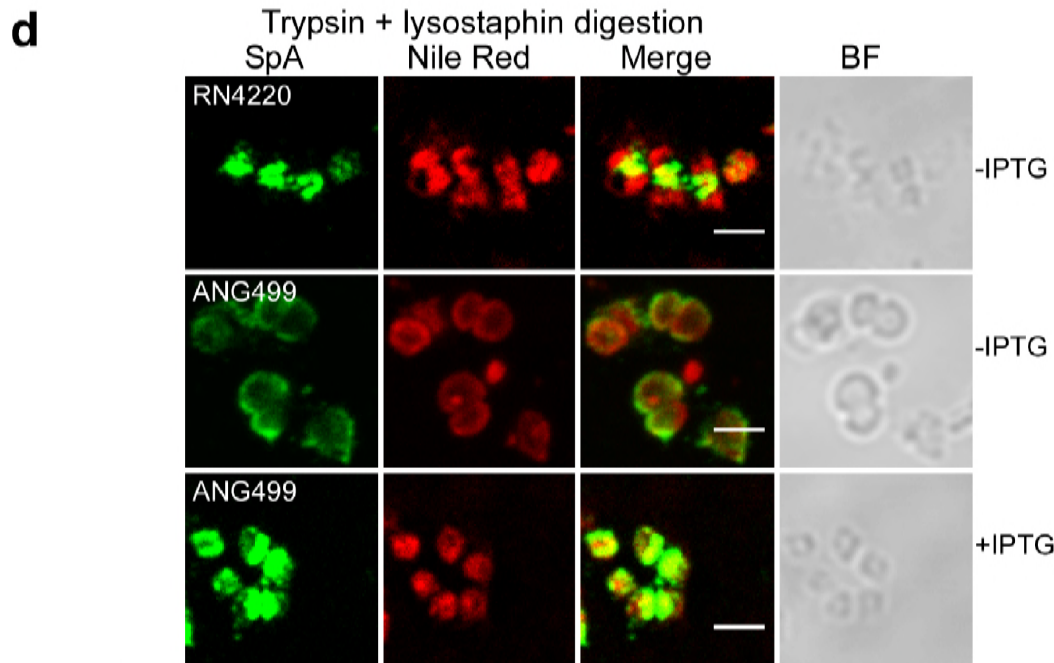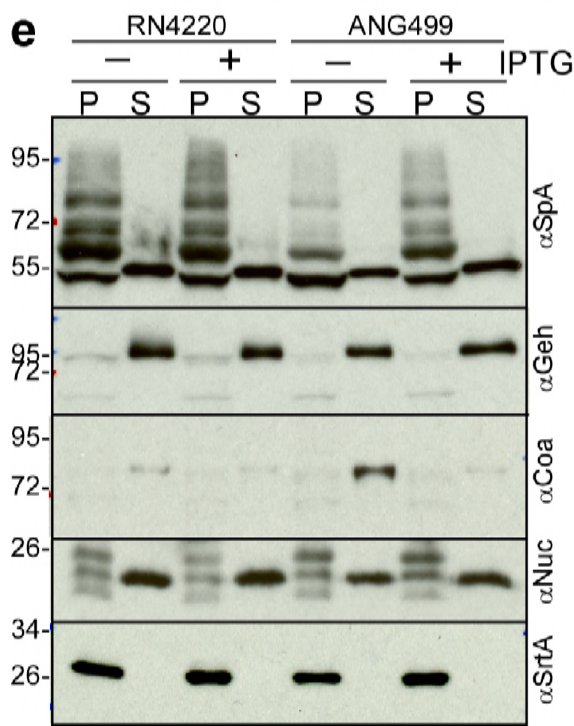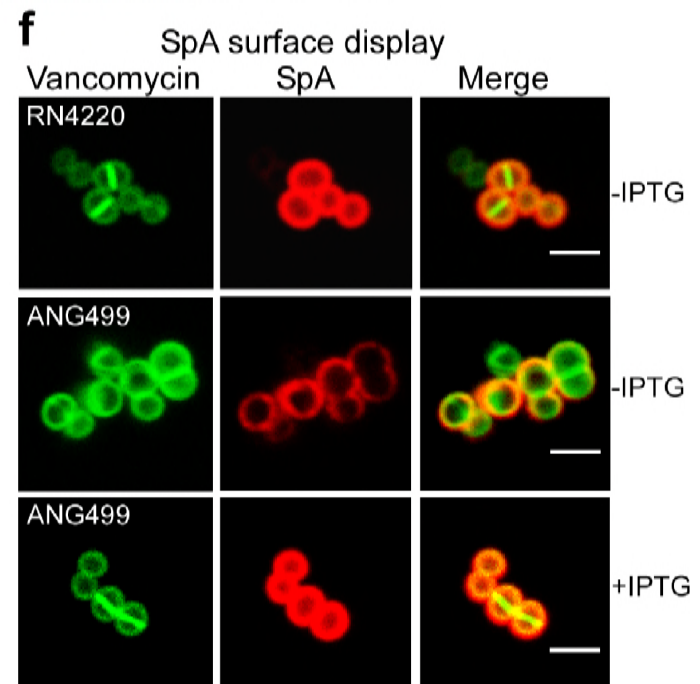

Source: http://biorxiv.org/content/10.1101/245522v1.full.pdf
